# Supplementary material for: Visible light-induced cascadeN-alkylation/amidation reaction of quinazolin-4(3H)-ones and related N-heterocycles
Source: Royal Society of Chemistry journal article supplement (doi:10.1039/d2ob02226e), 2023-01-01
Supplement: d2ob02226e1.pdf [file d2ob02226e1.pdf]

## Electronic Supporting Information

### Visible Light induced Cascade *N*-Alkylation/Amidation Reaction of Quinazolin-4(3*H*)-ones and Related *N*-Heterocycles

Jiexiong Mai,<sup>1</sup> Ziwei Huang,<sup>1</sup> Shaohuan Lv,<sup>1</sup> Quan Chen,<sup>1</sup> Rongrong Chen,<sup>1</sup> Feng Xie<sup>1\*</sup>, Jun Wang<sup>2</sup> and Bin Li<sup>1\*</sup>

<sup>1</sup>*School of Biotechnology and Health Sciences, Wuyi University, Jiangmen 529020, Guangdong Province, P.R. China*

<sup>2</sup>*Department of Chemistry, Hong Kong Baptist University, Kowloon, Hong Kong, China*

#### Table of Contents

|     |                                                                        |
|-----|------------------------------------------------------------------------|
| S2  | <i>General remarks</i>                                                 |
| S2  | <i>General procedures for N-alkylation/amidation cascade reactions</i> |
| S4  | <i>The data of reaction optimization</i>                               |
| S8  | <i>Characterization data of substrates</i>                             |
| S25 | <i>Table of crystallographic data for 3i (CCDC 2189508)</i>            |
| S26 | <i><sup>1</sup>H and <sup>13</sup>C NMR Spectra</i>                    |

### ***General remarks***

All reagents were obtained from commercial sources and used as received. Ethanol (anhydrous) were used as received. Technical grade petroleum ether (40-60°C bp.) and ethyl acetate were used for chromatography column.

<sup>1</sup>H NMR spectra were recorded in CDCl<sub>3</sub> at ambient temperature on Bruker AVANCE I 500 spectrometers at 500.1 MHz, using the solvent as internal standard (7.26 ppm). <sup>13</sup>C NMR spectra were obtained at 125 MHz and referenced to the internal solvent signals (central peak is 77.2 ppm). Chemical shift ( $\delta$ ) and coupling constants ( $J$ ) are given in ppm and in Hz, respectively. The peak patterns are indicated as follows: s, singlet; d, doublet; t, triplet; q, quartet; m, multiplet, and br. for broad.

GC analyses were performed with GC-7890A (Agilent) equipped with a 30-m capillary column (HP-5ms, fused silica capillary column, 30 M\*0.25 mm\*0.25 mm film thickness), was used with N<sub>2</sub>/air as vector gas. GCMS were measured by GCMS-7890A-5975C (Agilent) with GC-7890A equipped with a 30-m capillary column (HP-5ms, fused silica capillary column, 30 M\*0.25 mm\*0.25 mm film thickness), was used with helium as vector gas. HRMS were measured by MAT 95XP (Termol) (LCMS-IT-TOF).

Compounds **3i** were collected at 100 K on a Rigaku Oxford Diffraction Supernova Dual Source, Cu at Zero equipped with an AtlasS2 CCD using Cu K $\alpha$  radiation. Data reduction was carried out with the diffractometer's software.

### **General procedure for I<sub>2</sub>/K<sub>2</sub>CO<sub>3</sub> promoted oxidative N-alkylation/amidation of quinazolinone derivatives with alkyl bromides or chlorides**

Quinazolinone derivative (0.25 mmol), alkyl bromide or chloride (0.375 mmol), I<sub>2</sub> (0.25 mmol), K<sub>2</sub>CO<sub>3</sub> (0.375 mmol), and DMC (0.5 mL) were introduced in Schlenck tube under 36W white LEDs under air atmosphere, equipped with magnetic stirring bar and was stirred at 100 °C. After 6 h, the solvent was then evaporated under vacuum and the desired product was purified by using a silica gel chromatography column and a mixture of petrol ether/ethyl acetate as eluent.

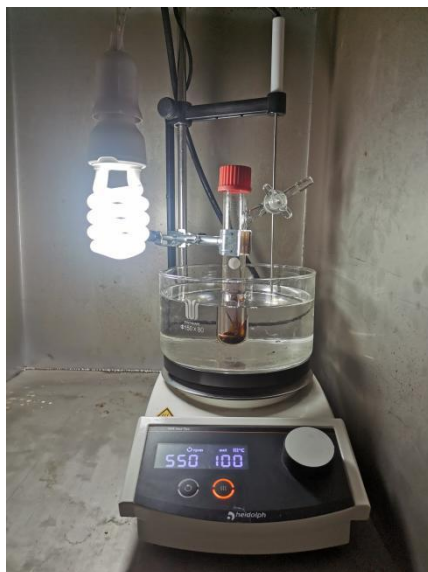

**Figure S1.** A photo for the reaction set-up.

**General procedure for I<sub>2</sub>/K<sub>2</sub>CO<sub>3</sub> promoted oxidative *N*-alkylation/amidation of *N*-heterocycles with benzyl bromide**

*N*-heterocycle (0.25 mmol), benzyl bromide (0.375 mmol), I<sub>2</sub> (0.25 mmol), K<sub>2</sub>CO<sub>3</sub> (0.375 mmol), and DMC (0.5 mL) were introduced in Schlenk tube under 36W white LEDs under air atmosphere, equipped with magnetic stirring bar and was stirred at 100 °C. After 6 h, the solvent was then evaporated under vacuum and the desired product was purified by using a silica gel chromatography column and a mixture of petrol ether/ethyl acetate as eluent.

**Procedure for the synthesis of 1,3-dibenzyl-4-oxo-3,4-dihydroquinazolin-1-ium bromide (compound 8)**

3-Benzylquinazolin-4(3H)-one (0.5 mmol), benzyl bromide (0.75 mmol), acetone (2.0 mL) were introduced in Schlenk tube, equipped with magnetic stirring bar and was stirred at 100 °C. After 12 h, the reaction mixture was filtered, and the residue of the product was washed with diethyl ether (20 mL × 3), and dried under vacuum.

**Procedure for the synthesis of 3-benzyl-2-(benzyloxy)quinazolin-4(3H)-one (compound 9)**

3-Benzyl-2-chloroquinazolin-4(3H)-one (0.5 mmol), benzyl alcohol (0.75 mmol), KO<sup>t</sup>Bu (0.75 mmol), 1,4-dioxane (2.0 mL) were introduced in Schlenk tube, equipped with magnetic stirring bar and was stirred at 100 °C. After 18 h, the solvent was then evaporated under vacuum and the desired product was purified by using a silica gel chromatography column and a mixture of petrol ether/ethyl acetate as eluent.

## The data of reaction optimization

**Table S1.** Screening of different temperature<sup>a</sup>

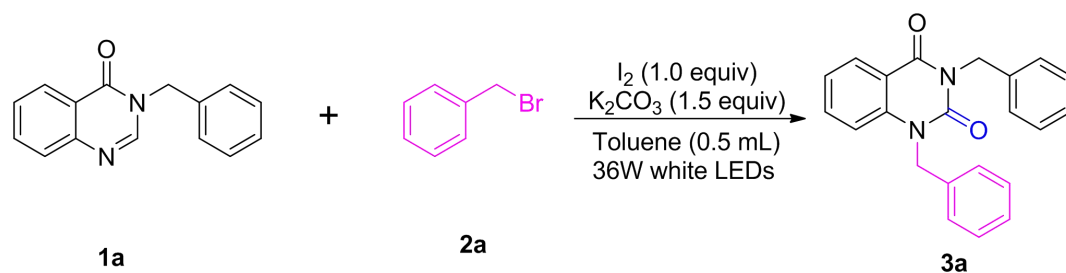

| Entry | Temp. (°C) | Yield (%) |
|-------|------------|-----------|
| 1     | R.T        | 6         |
| 2     | 50         | 47        |
| 3     | 90         | 75        |
| 4     | 95         | 83        |
| 5     | 100        | 95        |
| 6     | 105        | 94        |

<sup>a</sup>Reaction conditions: quinazolin-4(3*H*)-one (0.25 mmol), benzyl bromide (1.5 equiv), I<sub>2</sub> (1.0 equiv), K<sub>2</sub>CO<sub>3</sub> (1.5 equiv), toluene (0.5 mL) under 36W white LEDs for 6 h, air atmosphere.

**Table S2.** Screening of different bases<sup>a</sup>

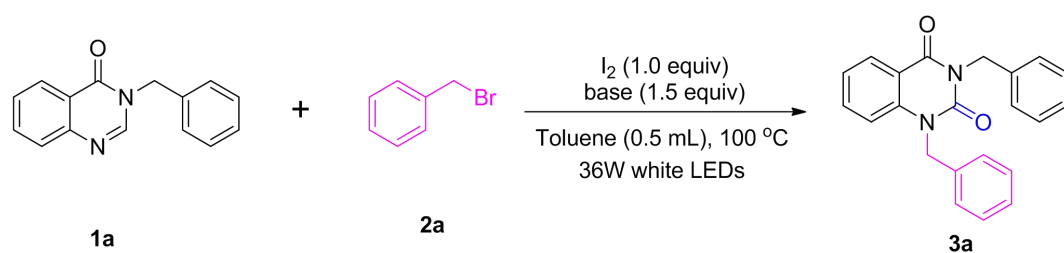

| Entry | Base                               | Yield(%) |
|-------|------------------------------------|----------|
| 1     | K <sub>2</sub> CO <sub>3</sub>     | 95       |
| 2     | KOAc                               | 84       |
| 3     | <i>t</i> -BuOK                     | 43       |
| 4     | C <sub>6</sub> H <sub>5</sub> COOK | 68       |
| 5     | K <sub>3</sub> PO <sub>4</sub>     | 88       |
| 6     | CF <sub>3</sub> COOK               | 8        |
| 7     | KOTf                               | ---      |
| 8     | KOH                                | trace    |
| 9     | Cs <sub>2</sub> CO <sub>3</sub>    | 18       |
| 10    | NaOH                               | 72       |
| 11    | CaHCO <sub>3</sub>                 | 82       |

<sup>a</sup>Reaction conditions: quinazolin-4(3*H*)-one (0.25 mmol), benzyl bromide (1.5 equiv), I<sub>2</sub> (1.0 equiv), base (1.5 equiv), toluene (0.5 mL) at 100°C under 36W white LEDs for 6 h, air atmosphere.



**Table S3.** Screening of different oxidants<sup>a</sup>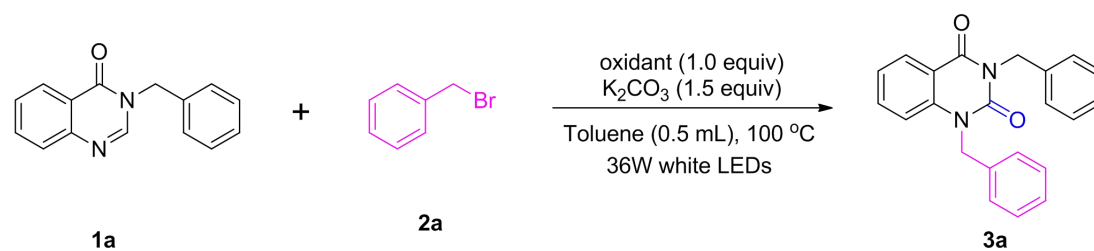

| Entry | Oxidant                                       | Yield(%) |
|-------|-----------------------------------------------|----------|
| 1     | I <sub>2</sub>                                | 95       |
| 2     | C <sub>6</sub> Cl <sub>4</sub> O <sub>2</sub> | trace    |
| 3     | CuSO <sub>4</sub>                             | trace    |
| 4     | TBHP                                          | 8        |
| 5     | CuO                                           | 25       |

<sup>a</sup>Reaction conditions: quinazolin-4(3*H*)-one (0.25 mmol), benzyl bromide (1.5 equiv), oxidant (1.0 equiv), K<sub>2</sub>CO<sub>3</sub> (1.5 equiv), toluene (0.5 mL) at 100 °C under 36W white LEDs for 6 h, air atmosphere.

**Table S3.** Screening of different solvents<sup>a</sup>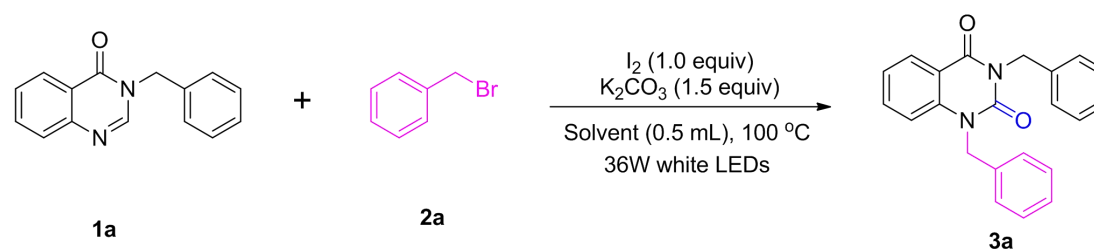

| Entry | Solvent            | Yield(%) |
|-------|--------------------|----------|
| 1     | 1,4-dioxane        | 87       |
| 2     | Toluene            | 95       |
| 3     | DMF                | 36       |
| 4     | DMC                | 99       |
| 5     | THF                | 55       |
| 6     | Ethanol            | 51       |
| 7     | 1,2-Dichloroethane | 41       |

<sup>a</sup>Reaction conditions: quinazolin-4(3*H*)-one (0.25 mmol), benzyl bromide (1.5 equiv), I<sub>2</sub> (1.0 equiv), K<sub>2</sub>CO<sub>3</sub> (1.5 equiv), solvent (0.5 mL) at 100 °C under 36W white LEDs for 6 h, air atmosphere.

**Scheme S1 Control experiments.**

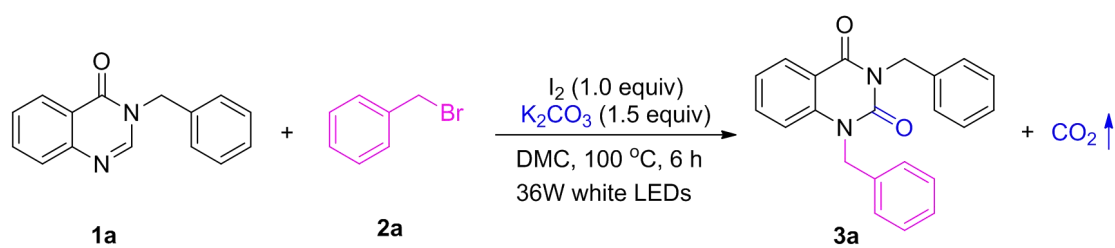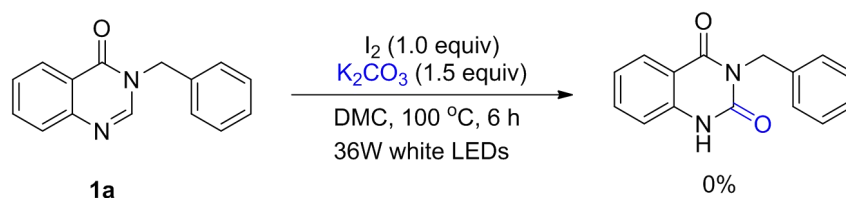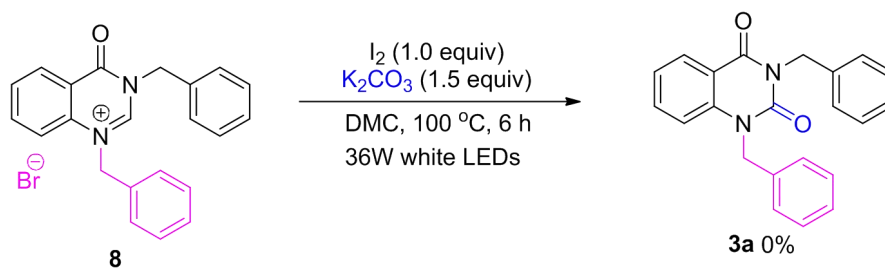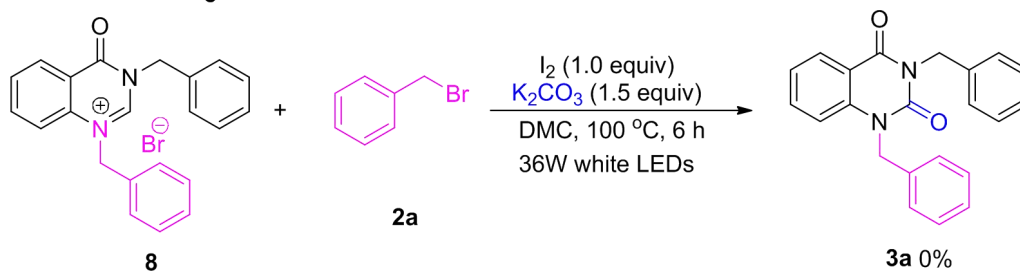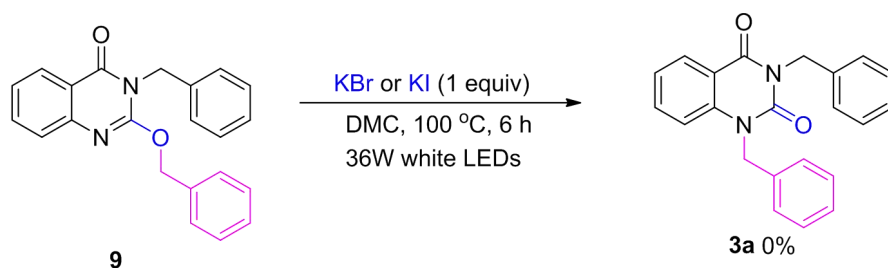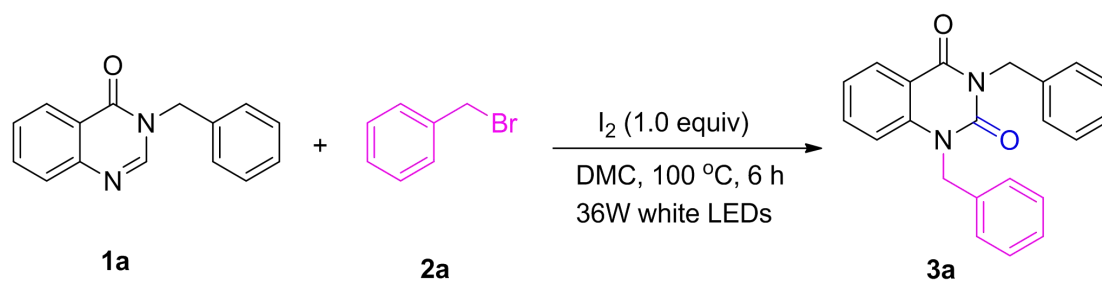

Without  $\text{K}_2\text{CO}_3$  : 0%  
 $\text{O}_2$  instead of  $\text{K}_2\text{CO}_3$  : 0%  
 Under  $\text{N}_2$  atmosphere : 95%

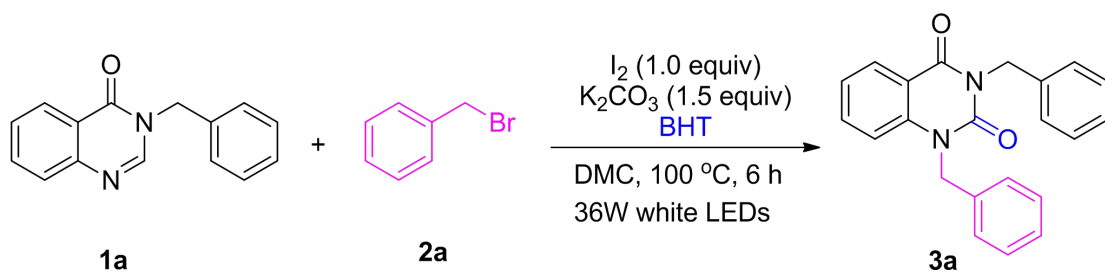

Without BHT : 99%  
With 1.0 equiv. of BHT : 43%  
With 2.2 equiv. of BHT : 0%

## Characterization data of substrates

---

### 1,3-dibenzylquinazoline-2,4(1H,3H)-dione<sup>[1]</sup> (3a)

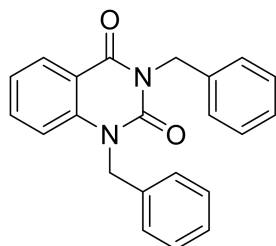

White solid, yield = 76%, 65 mg.

<sup>1</sup>H NMR (500 MHz, CDCl<sub>3</sub>): δ (ppm) = 8.27 (dd, 1H, *J* = 8.0, 1.5 Hz), 7.60-7.54 (m, 3H), 7.37-7.34 (m, 4H), 7.31-7.29 (m, 2H), 7.28-7.22 (m, 3H), 7.13-7.12 (m, 1H), 5.40 (s, 2H), 5.37 (s, 2H).

<sup>13</sup>C NMR (125 MHz, CDCl<sub>3</sub>): δ (ppm) = 161.8, 151.5, 140.0, 137.0, 135.6, 135.1, 139.2, 139.03, 129.00, 128.5, 127.67, 127.66, 126.4, 123.1, 115.8, 114.4, 47.4, 45.2.

### 3-benzyl-1-(4-methylbenzyl)quinazoline-2,4(1H,3H)-dione (3b)

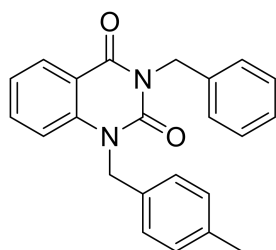

White solid, yield = 57%, 51 mg.

<sup>1</sup>H NMR (500 MHz, CDCl<sub>3</sub>): δ (ppm) = 8.27 (dd, 1H, *J* = 7.5, 1.5 Hz), 7.59-7.53 (m, 3H), 7.37-7.34 (m, 2H), 7.31-7.28 (m, 1H), 7.24-7.21 (m, 1H), 7.18-7.14 (m, 5H), 5.37 (s, 2H), 5.36 (s, 2H), 2.24 (s, 3H).

<sup>13</sup>C NMR (125 MHz, CDCl<sub>3</sub>): δ (ppm) = 161.9, 151.6, 140.1, 137.5, 137.2, 135.2, 132.7, 129.8, 129.2, 129.1, 128.6, 127.8, 126.6, 123.2, 115.9, 114.6, 47.3, 45.3, 21.2.

### 3-benzyl-1-(4-(tert-butyl)benzyl)quinazoline-2,4(1H,3H)-dione (3c)

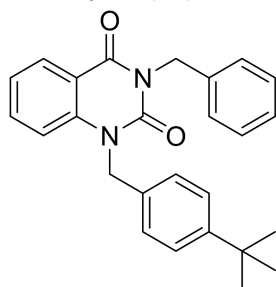

Yellow solid, yield = 61%, 61 mg.

$^1\text{H}$  NMR (500 MHz,  $\text{CDCl}_3$ ):  $\delta$  (ppm) = 8.27 (dd, 1H,  $J = 7.5, 1.5$  Hz), 7.60-7.55 (m, 3H), 7.38-7.34 (m, 4H), 7.31-7.30 (m, 1H), 7.25-7.17 (m, 4H), 5.37 (s, 4H), 1.32 (s, 9H).  
 $^{13}\text{C}$  NMR (125 MHz,  $\text{CDCl}_3$ ):  $\delta$  (ppm) = 162.0, 151.6, 150.7, 140.2, 137.2, 135.2, 132.7, 129.2, 129.1, 128.6, 127.8, 126.3, 126.0, 123.2, 115.8, 114.6, 47.2, 45.3, 34.6, 31.4.  
HRMS (EI):  $m/z$  calcd for  $\text{C}_{26}\text{H}_{27}\text{N}_2\text{O}_2$   $[\text{M}+\text{H}]^+$  399.2067, found 399.2068.

### 3-benzyl-1-(4-fluorobenzyl)quinazoline-2,4(1H,3H)-dione (3d)

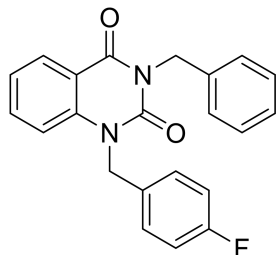

Yellow solid, yield = 70%, 63 mg.

$^1\text{H}$  NMR (500 MHz,  $\text{CDCl}_3$ ):  $\delta$  (ppm) = 8.28 (dd, 1H,  $J = 8.0, 2.0$  Hz), 7.59-7.56 (m, 3H), 7.37-7.34 (m, 2H), 7.31-7.30 (m, 1H), 7.27-7.23 (m, 3H), 7.11 (d, 1H,  $J = 8.5$  Hz), 7.06-7.02 (m, 2H), 5.36 (s, 4H).

$^{13}\text{C}$  NMR (125 MHz,  $\text{CDCl}_3$ ):  $\delta$  (ppm) = 163.3 (d,  $J_{\text{CF}} = 244.75$  Hz), 161.9, 151.6, 139.9, 137.1, 135.3, 131.5 (d,  $J_{\text{CF}} = 3.25$  Hz), 129.4, 129.2, 128.6, 128.4 (d,  $J_{\text{CF}} = 8.0$  Hz), 127.8, 123.4, 116.2 (d,  $J_{\text{CF}} = 21.5$  Hz), 115.9, 114.3, 46.9, 45.3.

$^{19}\text{F}$  NMR (470 MHz,  $\text{CDCl}_3$ ):  $\delta$  (ppm) = -114.5.

HRMS (EI):  $m/z$  calcd for  $\text{C}_{22}\text{H}_{18}\text{FN}_2\text{O}_2$   $[\text{M}+\text{H}]^+$  361.1346, found 361.1346.

### 3-benzyl-1-(4-bromobenzyl)quinazoline-2,4(1H,3H)-dione (3e)

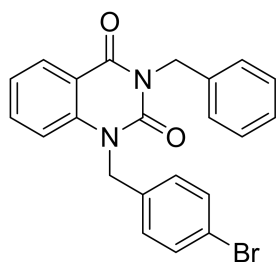

White solid, yield = 53%, 56 mg.

$^1\text{H}$  NMR (500 MHz,  $\text{CDCl}_3$ ):  $\delta$  (ppm) = 8.28 (dd, 1H,  $J = 8.0, 1.5$  Hz), 7.58-7.55 (m, 3H), 7.48-7.46 (m, 2H), 7.37-7.33 (m, 2H), 7.31-7.28 (m, 1H), 7.27-7.24 (m, 1H), 7.14 (d, 2H,  $J = 8.0$  Hz), 7.06 (d, 1H,  $J = 8.0$  Hz), 5.36 (s, 2H), 5.33 (s, 2H).

$^{13}\text{C}$  NMR (125 MHz,  $\text{CDCl}_3$ ):  $\delta$  (ppm) = 161.8, 151.5, 139.8, 137.0, 135.3, 134.8, 132.3, 129.4, 129.2, 128.6, 128.4, 127.9, 123.4, 121.7, 115.9, 114.3, 47.0, 45.3.

HRMS (EI):  $m/z$  calcd for  $\text{C}_{22}\text{H}_{18}\text{BrN}_2\text{O}_2$   $[\text{M}+\text{H}]^+$  421.0546, found 421.0547.

### 3-benzyl-1-(4-(trifluoromethyl)benzyl)quinazoline-2,4(1H,3H)-dione (3f)

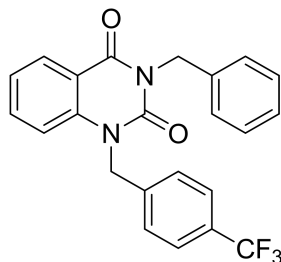

White solid, yield = 56%, 57 mg.

$^1\text{H}$  NMR (500 MHz,  $\text{CDCl}_3$ ):  $\delta$  (ppm) = 8.29 (dd, 1H,  $J$  = 8.0, 1.5 Hz), 7.62-7.56 (m, 5H), 7.38-7.30 (m, 5H), 7.26 (d, 1H,  $J$  = 7.5 Hz), 7.03 (d, 1H,  $J$  = 8.5 Hz), 5.44 (s, 2H), 5.36 (s, 2H).

$^{13}\text{C}$  NMR (125 MHz,  $\text{CDCl}_3$ ):  $\delta$  (ppm) = 161.8, 151.6, 139.9, 139.8, 137.0, 135.4, 130.3 (q,  $J_{\text{CF}}$  = 32.5 Hz), 129.6, 129.2, 128.7, 127.9, 126.9, 126.2 (q,  $J_{\text{CF}}$  = 3.6 Hz), 125.1 (q,  $J_{\text{CF}}$  = 270.3 Hz), 123.6, 116.0, 114.2, 47.2, 45.4.

$^{19}\text{F}$  NMR (470 MHz,  $\text{CDCl}_3$ ):  $\delta$  (ppm) = -62.6.

HRMS (EI):  $m/z$  calcd for  $\text{C}_{23}\text{H}_{18}\text{F}_3\text{N}_2\text{O}_2$   $[\text{M}+\text{H}]^+$  411.1314, found 411.1313.

### 3-benzyl-1-(2-methylbenzyl)quinazoline-2,4(1H,3H)-dione (3g)

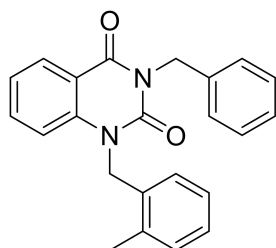

White solid, yield = 73%, 65 mg.

$^1\text{H}$  NMR (500 MHz,  $\text{CDCl}_3$ ):  $\delta$  (ppm) = 8.30 (dd, 1H,  $J$  = 8.0, 2.0 Hz), 7.59-7.58 (m, 2H), 7.55-7.51 (m, 1H), 7.36-7.33 (m, 2H), 7.31-7.18 (m, 4H), 7.10-7.07 (m, 1H), 6.90 (d, 1H,  $J$  = 8.0 Hz), 6.80-6.78 (m, 1H), 5.37 (s, 2H), 5.34 (s, 2H), 2.46 (s, 3H).

$^{13}\text{C}$  NMR (125 MHz,  $\text{CDCl}_3$ ):  $\delta$  (ppm) = 151.4, 140.2, 137.2, 135.3, 134.9, 133.0, 130.8, 129.23, 129.20, 128.6, 127.8, 127.4, 126.6, 124.4, 123.3, 115.8, 114.6, 45.7, 45.3, 19.3.

### 3-benzyl-1-(2-fluorobenzyl)quinazoline-2,4(1H,3H)-dione (3h)

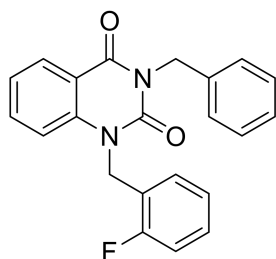

Yellow solid, yield = 93%, 84 mg.

$^1\text{H}$  NMR (500 MHz,  $\text{CDCl}_3$ ):  $\delta$  (ppm) = 8.27 (dd, 1H,  $J$  = 8.0, 2.0 Hz), 7.60-7.56 (m, 3H), 7.37-7.34 (m, 2H), 7.32-7.29 (m, 1H), 7.28-7.23 (m, 2H), 7.15-7.04 (m, 4H), 5.46 (s, 2H), 5.37 (s, 2H).

$^{13}\text{C}$  NMR (125 MHz,  $\text{CDCl}_3$ ):  $\delta$  (ppm) = 161.8, 161.4 (d,  $J_{\text{CF}} = 243.75$  Hz), 151.6, 139.7, 137.1, 135.4, 129.6 (d,  $J_{\text{CF}} = 7.5$  Hz), 129.3, 129.1, 128.6, 128.2 (d,  $J_{\text{CF}} = 3.75$  Hz), 127.8, 124.9 (d,  $J_{\text{CF}} = 3.75$  Hz), 123.4, 122.9 (d,  $J_{\text{CF}} = 12.5$  Hz), 115.9 (d,  $J_{\text{CF}} = 6.25$  Hz), 115.7, 114.1 (d,  $J_{\text{CF}} = 1.25$  Hz), 45.3, 41.2 (d,  $J_{\text{CF}} = 5.0$  Hz).

$^{19}\text{F}$  NMR (470 MHz,  $\text{CDCl}_3$ ):  $\delta$  (ppm) = -118.5.

HRMS (EI):  $m/z$  calcd for  $\text{C}_{22}\text{H}_{18}\text{FN}_2\text{O}_2$   $[\text{M}+\text{H}]^+$  361.1346, found 361.1350.

### 3-benzyl-1-(2-chlorobenzyl)quinazoline-2,4(1H,3H)-dione (3i)

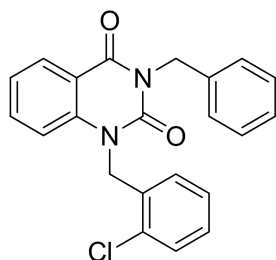

White solid, yield = 73%, 69 mg.

$^1\text{H}$  NMR (500 MHz,  $\text{CDCl}_3$ ):  $\delta$  (ppm) = 8.30 (dd, 1H,  $J = 8.0, 1.5$  Hz), 7.60-7.54 (m, 3H), 7.46 (dd, 1H,  $J = 8.0, 1.5$  Hz), 7.37-7.34 (m, 2H), 7.32-7.29 (m, 1H), 7.27-7.23 (m, 2H), 7.17-7.14 (m, 1H), 6.94-6.90 (m, 2H), 5.48 (s, 2H), 5.38 (s, 2H).

$^{13}\text{C}$  NMR (125 MHz,  $\text{CDCl}_3$ ):  $\delta$  (ppm) = 161.8, 151.4, 139.7, 137.0, 135.4, 132.8, 132.6, 129.9, 129.3, 129.2, 128.9, 128.6, 127.8, 127.5, 126.7, 123.4, 115.8, 114.5, 45.33, 45.30.

### 3-benzyl-1-(2-bromobenzyl)quinazoline-2,4(1H,3H)-dione (3j)

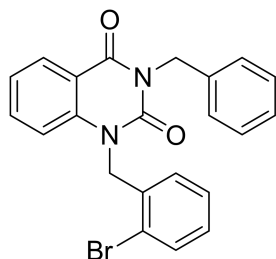

Yellow solid, yield = 83%, 87 mg.

$^1\text{H}$  NMR (500 MHz,  $\text{CDCl}_3$ ):  $\delta$  (ppm) = 8.29 (dd, 1H,  $J = 8.0, 1.5$  Hz), 7.65 (dd, 1H,  $J = 7.5, 1.5$  Hz), 7.59-7.54 (m, 3H), 7.37-7.33 (m, 2H), 7.31-7.30 (m, 1H), 7.28-7.24 (m, 1H), 7.21-7.15 (m, 2H), 6.91-6.86 (m, 2H), 5.43 (s, 2H), 5.37 (s, 2H).

$^{13}\text{C}$  NMR (125 MHz,  $\text{CDCl}_3$ ):  $\delta$  (ppm) = 161.9, 151.5, 139.8, 137.0, 135.5, 134.2, 133.3, 129.3, 129.24, 129.21, 128.6, 128.1, 127.8, 126.8, 123.5, 122.4, 115.9, 114.5, 48.0, 45.3.

HRMS (EI):  $m/z$  calcd for  $\text{C}_{22}\text{H}_{18}\text{BrN}_2\text{O}_2$   $[\text{M}+\text{H}]^+$  421.0546, found 421.0546.

### 3-benzyl-1-(2-iodobenzyl)quinazoline-2,4(1H,3H)-dione (3k)

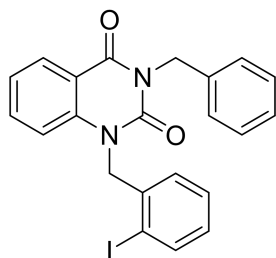

White solid, yield = 73%, 85 mg.

$^1\text{H}$  NMR (500 MHz,  $\text{CDCl}_3$ ):  $\delta$  (ppm) = 8.30 (dd, 1H,  $J$  = 8.0, 2.0 Hz), 7.93 (dd, 1H,  $J$  = 8.0, 1.0 Hz), 7.60-7.54 (m, 3H), 7.37-7.34 (m, 2H), 7.31-7.21 (m, 3H), 7.02-6.99 (m, 1H), 6.85-6.80 (m, 2H), 5.37 (s, 2H), 5.33 (s, 2H).

$^{13}\text{C}$  NMR (125 MHz,  $\text{CDCl}_3$ ):  $\delta$  (ppm) = 161.8, 151.4, 139.9, 139.7, 137.0, 136.8, 135.5, 129.4, 129.3, 129.2, 128.9, 128.6, 127.8, 126.2, 123.5, 115.8, 114.6, 97.2, 53.1, 45.3.

HRMS (EI):  $m/z$  calcd for  $\text{C}_{22}\text{H}_{18}\text{IN}_2\text{O}_2$   $[\text{M}+\text{H}]^+$  469.0407, found 469.0408.

### methyl 2-((3-benzyl-2,4-dioxo-3,4-dihydroquinazolin-1(2H)-yl)methyl)benzoate (3l)

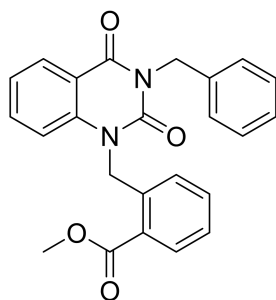

Yellow solid, yield = 65%, 65 mg.

$^1\text{H}$  NMR (500 MHz,  $\text{CDCl}_3$ ):  $\delta$  (ppm) = 8.30 (dd, 1H,  $J$  = 8.0, 1.5 Hz), 8.13 (dd, 1H,  $J$  = 8.0, 1.5 Hz), 7.58-7.56 (m, 2H), 7.55-7.51 (m, 1H), 7.42-7.32 (m, 4H), 7.30-7.28 (m, 1H), 7.27-7.23 (m, 1H), 6.98-6.94 (m, 2H), 5.84 (s, 2H), 5.36 (s, 2H), 4.00 (s, 3H).

$^{13}\text{C}$  NMR (125 MHz,  $\text{CDCl}_3$ ):  $\delta$  (ppm) = 167.5, 162.0, 151.5, 140.2, 137.7, 137.2, 135.4, 133.2, 131.8, 129.3, 129.2, 128.6, 128.0, 127.8, 127.4, 125.6, 123.4, 115.9, 114.6, 52.4, 56.8, 45.3.

HRMS (EI):  $m/z$  calcd for  $\text{C}_{24}\text{H}_{21}\text{N}_2\text{O}_4$   $[\text{M}+\text{H}]^+$  401.1495, found 401.1496.

### 3-benzyl-1-(3,5-dimethoxybenzyl)quinazoline-2,4(1H,3H)-dione (3m)

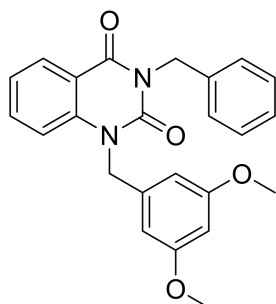

White solid, yield = 51%, 51 mg.



<sup>1</sup>H NMR (500 MHz, CDCl<sub>3</sub>): δ (ppm) = 8.26 (dd, 1H, *J* = 7.5, 1.5 Hz), 7.58-7.54 (m, 3H), 7.34-7.31 (m, 2H), 7.28-7.22 (m, 2H), 7.14 (d, 1H, *J* = 8.5 Hz), 6.38-6.35 (m, 3H), 5.36 (s, 2H), 5.32 (s, 2H), 3.72 (s, 6H).

<sup>13</sup>C NMR (125 MHz, CDCl<sub>3</sub>): δ (ppm) = 161.9, 161.4, 151.6, 140.1, 138.3, 137.2, 135.3, 129.3, 129.1, 128.6, 127.8, 123.3, 115.9, 114.6, 104.6, 99.3, 55.4, 47.6, 45.2.

HRMS (EI): *m/z* calcd for C<sub>24</sub>H<sub>23</sub>N<sub>2</sub>O<sub>4</sub> [M+H]<sup>+</sup> 403.1652, found 403.1652.

### 3-benzyl-1-(3,5-bis(trifluoromethyl)benzyl)quinazoline-2,4(1H,3H)-dione (3n)

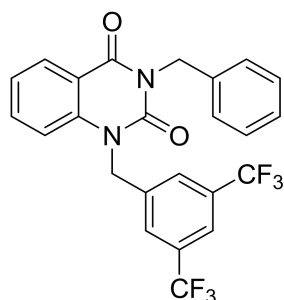

White solid, yield = 63%, 75 mg.

<sup>1</sup>H NMR (500 MHz, CDCl<sub>3</sub>): δ (ppm) = 8.32 (dd, 1H, *J* = 8.0, 2.0 Hz), 7.84 (s, 1H), 7.73 (s, 2H), 7.64-7.60 (m, 1H), 7.55 (d, 2H, *J* = 7.5 Hz), 7.36-7.28 (m, 4H), 7.03 (d, 1H, *J* = 8.5 Hz), 5.48 (s, 2H), 5.37 (s, 2H).

<sup>13</sup>C NMR (125 MHz, CDCl<sub>3</sub>): δ (ppm) = 161.6, 151.6, 139.5, 138.8, 136.8, 135.6, 132.7 (q, *J*<sub>CF</sub> = 33.3 Hz), 129.9, 129.0, 128.7, 128.0, 126.9, 124.2 (q, *J*<sub>CF</sub> = 271.1 Hz), 123.9, 122.2 (q, *J*<sub>CF</sub> = 4.0 Hz), 116.1, 113.6, 46.9, 45.4.

<sup>19</sup>F NMR (470 MHz, CDCl<sub>3</sub>): δ (ppm) = -62.9.

HRMS (EI): *m/z* calcd for C<sub>24</sub>H<sub>17</sub>F<sub>6</sub>N<sub>2</sub>O<sub>2</sub> [M+H]<sup>+</sup> 479.1188, found 479.1189.

### 1-allyl-3-benzylquinazoline-2,4(1H,3H)-dione<sup>[2]</sup> (3o)

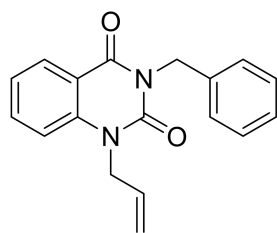

White solid, yield = 63%, 46 mg.

<sup>1</sup>H NMR (500 MHz, CDCl<sub>3</sub>): δ (ppm) = 8.26 (dd, 1H, *J* = 8.0, 1.5 Hz), 7.66-7.63 (m, 1H), 7.55 (d, 2H, *J* = 7.5 Hz), 7.33 (t, 2H, *J* = 7.0 Hz), 7.29-7.25 (m, 2H), 7.18 (d, 1H, *J* = 8.5 Hz), 5.98-5.90 (m, 1H), 5.32 (s, 2H), 5.30-5.20 (m, 2H), 4.79 (t, 2H, *J* = 2.5 Hz).

<sup>13</sup>C NMR (125 MHz, CDCl<sub>3</sub>): δ (ppm) = 161.9, 151.0, 140.0, 137.1, 135.2, 131.3, 129.25, 129.20, 128.6, 127.8, 123.2, 117.8, 115.8, 114.3, 46.2, 45.2.

### ethyl (E)-4-(3-benzyl-2,4-dioxo-3,4-dihydroquinazolin-1(2H)-yl)but-2-enoate (3p)

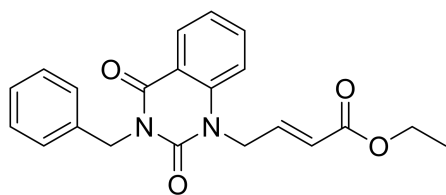

Yellow oil, yield = 86%, 78 mg.

$^1\text{H}$  NMR (500 MHz,  $\text{CDCl}_3$ ):  $\delta$  (ppm) = 8.28 (dd, 1H,  $J$  = 7.5, 1.5 Hz), 7.67-7.64 (m, 1H), 7.55-7.53 (m, 2H), 7.35-7.32 (m, 2H), 7.31-7.29 (m, 1H), 7.285-7.280 (m, 1H), 7.06-7.01 (m, 2H), 5.87-5.84 (m, 1H), 5.30 (s, 2H), 4.95-4.94 (m, 2H), 4.19 (q, 2H,  $J$  = 7.0 Hz), 1.28 (t, 3H,  $J$  = 7.0 Hz).

$^{13}\text{C}$  NMR (125 MHz,  $\text{CDCl}_3$ ):  $\delta$  (ppm) = 165.6, 161.7, 150.9, 140.9, 139.5, 136.9, 135.5, 129.5, 129.2, 128.6, 127.8, 123.6, 123.3, 115.8, 113.9, 60.9, 45.3, 44.6, 14.3.

HRMS (EI):  $m/z$  calcd for  $\text{C}_{21}\text{H}_{21}\text{N}_2\text{O}_4$   $[\text{M}+\text{H}]^+$  365.1495, found 365.1494.

**4'-((3-benzyl-2,4-dioxo-3,4-dihydroquinazolin-1(2H)-yl)methyl)-[1,1'-biphenyl]-2-carbonitrile (3q)**

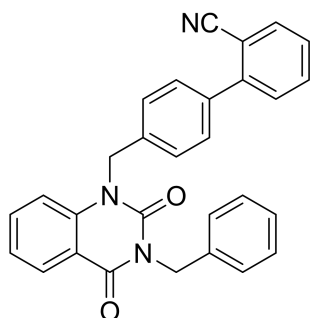

Yellow solid, yield = 86%, 95 mg.

$^1\text{H}$  NMR (500 MHz,  $\text{CDCl}_3$ ):  $\delta$  (ppm) = 8.30 (dd, 1H,  $J$  = 7.5, 1.5 Hz), 7.78 (dd, 1H,  $J$  = 7.5, 1.0 Hz), 7.67-7.54 (m, 6H), 7.50-7.45 (m, 2H), 7.40-7.34 (m, 4H), 7.31-7.29 (m, 1H), 7.27-7.25 (m, 1H), 7.12 (d, 1H,  $J$  = 8.5 Hz), 5.46 (s, 2H), 5.38 (s, 2H).

$^{13}\text{C}$  NMR (125 MHz,  $\text{CDCl}_3$ ):  $\delta$  (ppm) = 161.9, 151.6, 144.9, 140.0, 137.7, 137.1, 136.4, 135.5, 134.0, 133.1, 130.2, 129.5, 129.4, 129.2, 128.6, 127.9, 127.8, 127.0, 123.4, 118.8, 115.9, 114.5, 111.2, 47.3, 45.3.

HRMS (EI):  $m/z$  calcd for  $\text{C}_{29}\text{H}_{22}\text{N}_3\text{O}_2$   $[\text{M}+\text{H}]^+$  444.1706, found 444.1706.

**3-benzyl-1-((5-chlorothiophen-2-yl)methyl)quinazoline-2,4(1H,3H)-dione (3r)**

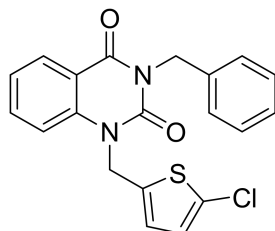

Yellow solid, yield = 76%, 73 mg.

$^1\text{H}$  NMR (500 MHz,  $\text{CDCl}_3$ ):  $\delta$  (ppm) = 8.27 (dd, 1H,  $J$  = 8.0, 1.5 Hz), 7.70-7.66 (m, 1H), 7.55 (d, 2H,  $J$  = 7.0 Hz), 7.36-7.30 (m, 4H), 7.28-7.27 (m, 1H), 6.90 (d, 1H,  $J$  = 3.5 Hz), 6.78 (d, 1H,  $J$  = 4.0 Hz), 5.38 (s, 2H), 5.33 (s, 2H).

$^{13}\text{C}$  NMR (125 MHz,  $\text{CDCl}_3$ ):  $\delta$  (ppm) = 161.7, 151.1, 139.4, 136.9, 136.8, 135.4, 130.4, 129.7, 129.1, 128.6, 127.8, 126.4, 125.8, 123.5, 116.0, 113.6, 45.2, 42.8.

HRMS (EI):  $m/z$  calcd for  $\text{C}_{20}\text{H}_{16}\text{ClN}_2\text{O}_2\text{S}$   $[\text{M}+\text{H}]^+$  383.0615, found 383.0619.

### 3-benzyl-1-(3-(trimethylsilyl)prop-2-yn-1-yl)quinazoline-2,4(1H,3H)-dione (3t)

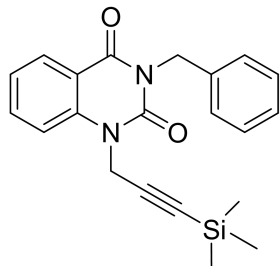

Colorless oil, yield = 51%, 46 mg.

$^1\text{H}$  NMR (500 MHz,  $\text{CDCl}_3$ ):  $\delta$  (ppm) = 8.28 (dd, 1H,  $J$  = 8.0, 1.5 Hz), 7.73-7.70 (m, 1H), 7.56 (d, 2H,  $J$  = 7.0 Hz), 7.41 (d, 1H,  $J$  = 8.5 Hz), 7.35-7.27 (m, 4H), 5.30 (s, 2H), 4.96 (s, 2H), 0.15 (s, 9H).

$^{13}\text{C}$  NMR (125 MHz,  $\text{CDCl}_3$ ):  $\delta$  (ppm) = 161.8, 150.6, 139.3, 137.0, 135.1, 129.3, 129.2, 128.6, 127.8, 123.5, 116.0, 114.5, 98.6, 90.8, 45.3, 34.6, 0.1.

### 1-benzyl-3-(4-methylbenzyl)quinazoline-2,4(1H,3H)-dione (5a)

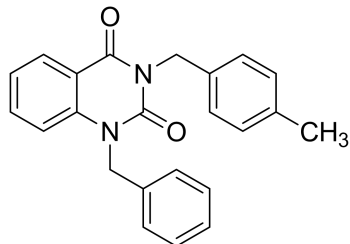

White solid, yield = 65%, 58 mg.

$^1\text{H}$  NMR (500 MHz,  $\text{CDCl}_3$ ):  $\delta$  (ppm) = 8.27 (dd, 1H,  $J$  = 8.0, 1.5 Hz), 7.56-7.52 (m, 1H), 7.49 (d, 2H,  $J$  = 7.5 Hz), 7.35 (t, 2H,  $J$  = 7.0 Hz), 7.30-7.28 (m, 1H), 7.27-7.21 (m, 3H), 7.16 (d, 2H,  $J$  = 8.0 Hz), 7.11 (d, 1H,  $J$  = 8.5 Hz), 5.39 (s, 2H), 5.33 (s, 2H), 2.34 (s, 3H).

$^{13}\text{C}$  NMR (125 MHz,  $\text{CDCl}_3$ ):  $\delta$  (ppm) = 161.9, 151.6, 140.1, 137.5, 135.8, 135.2, 129.29, 129.27, 129.20, 129.1, 127.8, 126.6, 123.2, 115.9, 114.5, 47.5, 45.1, 21.3.

HRMS (EI):  $m/z$  calcd for  $\text{C}_{23}\text{H}_{21}\text{N}_2\text{O}_2$   $[\text{M}+\text{H}]^+$  357.1597, found 357.1598.

### 1-benzyl-3-(4-(tert-butyl)benzyl)quinazoline-2,4(1H,3H)-dione (5b)

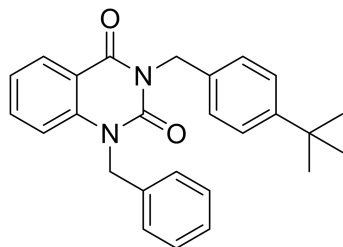

Colorless oil, yield = 75%, 75 mg.

$^1\text{H}$  NMR (500 MHz,  $\text{CDCl}_3$ ):  $\delta$  (ppm) = 8.27 (dd, 1H,  $J$  = 8.0, 1.5 Hz), 7.55-7.54 (m, 3H), 7.39-7.34 (m, 4H), 7.31-7.28 (m, 2H), 7.27-7.21 (m, 2H), 7.12 (d, 1H,  $J$  = 8.5 Hz), 5.40 (s, 2H), 5.35 (s, 2H), 1.33 (s, 9H).

$^{13}\text{C}$  NMR (125 MHz,  $\text{CDCl}_3$ ):  $\delta$  (ppm) = 162.0, 151.6, 150.6, 140.1, 135.8, 135.2, 134.2, 129.3, 129.1, 129.0, 127.8, 126.6, 125.5, 123.2, 116.0, 114.5, 47.6, 45.0, 34.7, 31.5.

HRMS (EI):  $m/z$  calcd for  $\text{C}_{26}\text{H}_{27}\text{N}_2\text{O}_2$   $[\text{M}+\text{H}]^+$  399.2067, found 399.2068.

#### 1-benzyl-3-(4-bromobenzyl)quinazoline-2,4(1H,3H)-dione (5c)

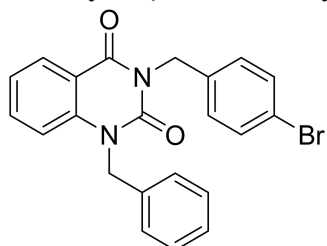

Yellow oil, yield = 83%, 87 mg.

$^1\text{H}$  NMR (500 MHz,  $\text{CDCl}_3$ ):  $\delta$  (ppm) = 8.27-8.25 (m, 1H), 7.58-7.54 (m, 1H), 7.47 (s, 4H), 7.37-7.34 (m, 2H), 7.31-7.28 (m, 1H), 7.26-7.23 (m, 3H), 7.13 (d, 1H,  $J$  = 8.5 Hz), 5.39 (s, 2H), 5.30 (s, 2H).

$^{13}\text{C}$  NMR (125 MHz,  $\text{CDCl}_3$ ):  $\delta$  (ppm) = 161.9, 151.5, 140.0, 136.1, 135.6, 131.7, 131.1, 129.3, 129.2, 127.9, 126.5, 123.4, 121.9, 115.8, 114.6, 47.6, 44.7.

HRMS (EI):  $m/z$  calcd for  $\text{C}_{22}\text{H}_{18}\text{BrN}_2\text{O}_2$   $[\text{M}+\text{H}]^+$  421.0546, found 421.0546.

#### 1-benzyl-3-(4-(trifluoromethyl)benzyl)quinazoline-2,4(1H,3H)-dione (5d)

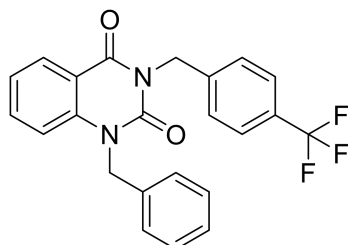

White solid, yield = 81%, 83 mg.

$^1\text{H}$  NMR (500 MHz,  $\text{CDCl}_3$ ):  $\delta$  (ppm) = 8.27 (dd, 1H,  $J$  = 8.0, 1.5 Hz), 7.68 (d, 2H,  $J$  = 8.0 Hz), 7.62-7.56 (m, 3H), 7.36 (t, 2H,  $J$  = 7.5 Hz), 7.31 (d, 1H,  $J$  = 7.0 Hz), 7.27-7.24 (m, 3H), 7.15 (d, 1H,  $J$  = 8.5 Hz), 5.41 (s, 4H).

$^{13}\text{C}$  NMR (125 MHz,  $\text{CDCl}_3$ ):  $\delta$  (ppm) = 161.9, 151.5, 141.0, 140.1, 135.6, 135.5, 130.1 (q,  $J_{\text{CF}}$  = 32.1 Hz), 129.4, 129.3, 129.2, 127.9, 126.5, 125.7 (q,  $J_{\text{CF}}$  = 3.9 Hz), 125.4 (q,  $J_{\text{CF}}$  = 270.4 Hz), 123.5, 115.7, 114.7, 47.6, 44.9.

$^{19}\text{F}$  NMR (470 MHz,  $\text{CDCl}_3$ ):  $\delta$  (ppm) = -62.5.

HRMS (EI):  $m/z$  calcd for  $\text{C}_{23}\text{H}_{18}\text{F}_3\text{N}_2\text{O}_2$   $[\text{M}+\text{H}]^+$  411.1314, found 411.1314.

#### 1-benzyl-3-(2-chlorobenzyl)quinazoline-2,4(1H,3H)-dione (5e)

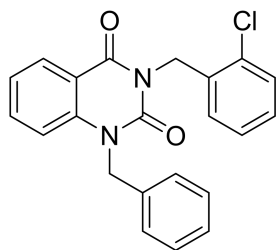

White solid, yield = 66%, 62 mg.

$^1\text{H}$  NMR (500 MHz,  $\text{CDCl}_3$ ):  $\delta$  (ppm) = 8.29 (dd, 1H,  $J$  = 8.0, 2.0 Hz), 7.62-7.58 (m, 1H), 7.43-7.41 (m, 1H), 7.36 (t, 2H,  $J$  = 7.5 Hz), 7.31-7.28 (m, 2H), 7.27-7.26 (m, 2H), 7.24-7.18 (m, 3H), 7.12-7.10 (m, 1H), 5.51 (s, 2H), 5.43 (s, 2H).

$^{13}\text{C}$  NMR (125 MHz,  $\text{CDCl}_3$ ):  $\delta$  (ppm) = 162.0, 151.5, 140.2, 135.7, 135.5, 134.2, 133.2, 129.8, 129.4, 129.2, 128.5, 127.9, 127.09, 127.03, 126.6, 123.4, 115.7, 114.7, 47.6, 43.2.

HRMS (EI):  $m/z$  calcd for  $\text{C}_{22}\text{H}_{18}\text{ClN}_2\text{O}_2$   $[\text{M}+\text{H}]^+$  377.1051, found 377.1052.

### 1-benzyl-3-(2-bromobenzyl)quinazoline-2,4(1H,3H)-dione (5f)

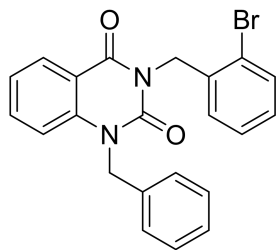

Yellow solid, yield = 61%, 64 mg.

$^1\text{H}$  NMR (500 MHz,  $\text{CDCl}_3$ ):  $\delta$  (ppm) = 8.29 (dd, 1H,  $J$  = 8.0, 1.5 Hz), 7.62-7.59 (m, 2H), 7.36 (t, 2H,  $J$  = 7.5 Hz), 7.31-7.28 (m, 3H), 7.27 (s, 1H), 7.24 (t, 1H,  $J$  = 7.0 Hz), 7.20 (d, 1H,  $J$  = 8.5 Hz), 7.15-7.12 (m, 1H), 7.05 (dd, 1H,  $J$  = 8.0, 1.5 Hz), 5.48 (s, 2H), 5.43 (s, 2H).

$^{13}\text{C}$  NMR (125 MHz,  $\text{CDCl}_3$ ):  $\delta$  (ppm) = 161.9, 151.4, 140.2, 135.67, 135.66, 135.5, 133.1, 129.4, 129.1, 128.7, 127.9, 127.6, 126.7, 126.6, 123.4, 123.0, 115.7, 114.7, 47.6, 45.6.

HRMS (EI):  $m/z$  calcd for  $\text{C}_{22}\text{H}_{18}\text{BrN}_2\text{O}_2$   $[\text{M}+\text{H}]^+$  421.0546, found 421.0545.

### 1-benzyl-3-(2-iodobenzyl)quinazoline-2,4(1H,3H)-dione (5g)

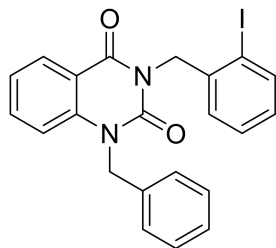

Yellow solid, yield = 39%, 46 mg.

$^1\text{H}$  NMR (500 MHz,  $\text{CDCl}_3$ ):  $\delta$  (ppm) = 8.29 (dd, 1H,  $J$  = 8.0, 2.0 Hz), 7.91-7.89 (m, 1H), 7.63-7.59 (m, 1H), 7.38-7.35 (m, 2H), 7.32-7.29 (m, 2H), 7.28-7.26 (m, 3H), 7.20 (d, 1H,  $J$  = 8.5 Hz), 6.99-6.95 (m, 2H), 5.43 (s, 2H), 5.39 (s, 2H).

$^{13}\text{C}$  NMR (125 MHz,  $\text{CDCl}_3$ ):  $\delta$  (ppm) = 161.8, 151.4, 140.2, 139.8, 138.5, 135.7, 135.6, 129.5, 129.2, 128.9, 128.5, 127.9, 126.6, 125.9, 123.5, 115.7, 114.7, 98.1, 50.6, 47.6.  
HRMS (EI):  $m/z$  calcd for  $\text{C}_{22}\text{H}_{18}\text{N}_2\text{O}_2$   $[\text{M}+\text{H}]^+$  469.0407, found 469.0410.

### 1-benzyl-3-(3,5-bis(trifluoromethyl)benzyl)quinazoline-2,4(1H,3H)-dione (5h)

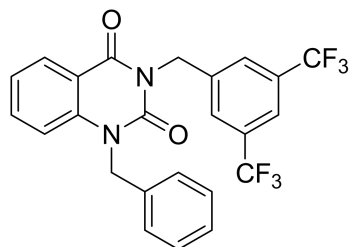

White solid, yield = 70%, 84 mg.

$^1\text{H}$  NMR (500 MHz,  $\text{CDCl}_3$ ):  $\delta$  (ppm) = 8.27 (dd, 1H,  $J$  = 8.0, 2.0 Hz), 8.05 (s, 2H), 7.83 (s, 1H), 7.62-7.58 (s, 1H), 7.38-7.34 (m, 2H), 7.32-7.29 (m, 1H), 7.28-7.26 (m, 3H), 7.18 (d, 1H,  $J$  = 8.5 Hz), 5.46 (s, 2H), 5.42 (s, 2H).

$^{13}\text{C}$  NMR (125 MHz,  $\text{CDCl}_3$ ):  $\delta$  (ppm) = 161.8, 151.5, 140.1, 139.5, 135.7, 135.5, 132.0 (q,  $J_{\text{CF}}$  = 33.0 Hz), 129.5 (q,  $J_{\text{CF}}$  = 3.9 Hz), 129.4, 129.2, 128.0, 126.6, 124.5 (q,  $J_{\text{CF}}$  = 271.0 Hz), 123.6, 122.0 (q,  $J_{\text{CF}}$  = 3.9 Hz), 115.6, 114.7, 47.6, 44.4.

$^{19}\text{F}$  NMR (470 MHz,  $\text{CDCl}_3$ ):  $\delta$  (ppm) = -62.7.

HRMS (EI):  $m/z$  calcd for  $\text{C}_{24}\text{H}_{17}\text{F}_6\text{N}_2\text{O}_2$   $[\text{M}+\text{H}]^+$  479.1188, found 479.1187.

### 3-allyl-1-benzylquinazoline-2,4(1H,3H)-dione (5i)

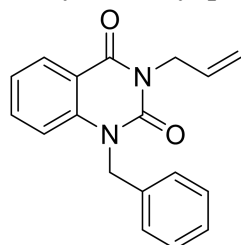

Yellow solid, yield = 90%, 66 mg.

$^1\text{H}$  NMR (500 MHz,  $\text{CDCl}_3$ ):  $\delta$  (ppm) = 8.26 (dd, 1H,  $J$  = 8.0, 1.5 Hz), 7.58-7.54 (m, 1H), 7.37-7.34 (m, 2H), 7.31-7.22 (m, 4H), 7.14 (d, 1H,  $J$  = 8.5 Hz), 6.06-5.98 (m, 1H), 5.41 (s, 2H), 5.38-5.34 (m, 1H), 5.27-5.25 (m, 1H), 4.80-4.79 (m, 2H).

$^{13}\text{C}$  NMR (125 MHz,  $\text{CDCl}_3$ ):  $\delta$  (ppm) = 161.6, 151.3, 140.1, 135.8, 135.2, 132.0, 129.2, 129.1, 127.8, 126.6, 123.2, 118.0, 115.8, 114.6, 47.4, 44.2.

HRMS (EI):  $m/z$  calcd for  $\text{C}_{18}\text{H}_{17}\text{N}_2\text{O}_2$   $[\text{M}+\text{H}]^+$  293.1284, found 293.1284.

### 1,3-dibenzyl-7-methoxyquinazoline-2,4(1H,3H)-dione (5j)

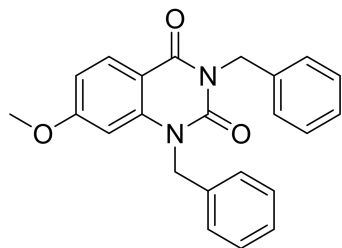

Yellow solid, yield = 80%, 74 mg.

$^1\text{H}$  NMR (500 MHz,  $\text{CDCl}_3$ ):  $\delta$  (ppm) = 8.18 (d, 1H,  $J$  = 9.0 Hz), 7.58-7.56 (m, 2H), 7.37-7.33 (m, 4H), 7.30-7.28 (s, 2H), 7.28-7.27 (m, 2H), 6.77 (dd, 1H,  $J$  = 9.0, 2.0 Hz), 6.55 (d, 1H,  $J$  = 2.0 Hz), 5.36 (s, 2H), 5.34 (s, 2H), 3.77 (s, 3H).

$^{13}\text{C}$  NMR (125 MHz,  $\text{CDCl}_3$ ):  $\delta$  (ppm) = 165.2, 161.6, 152.0, 141.8, 137.3, 135.9, 131.2, 129.2, 129.1, 128.6, 127.8, 127.7, 126.6, 109.9, 109.3, 99.5, 55.7, 47.7, 45.1.

HRMS (EI):  $m/z$  calcd for  $\text{C}_{23}\text{H}_{21}\text{N}_2\text{O}_3$   $[\text{M}+\text{H}]^+$  373.1546, found 373.1549.

### 1,3-dibenzyl-7-fluoroquinazoline-2,4(1H,3H)-dione (5k)

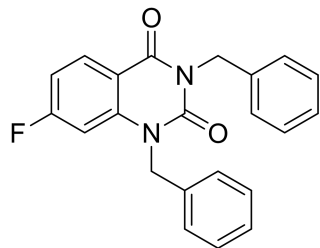

White, solid = 97%, 87 mg.

$^1\text{H}$  NMR (500 MHz,  $\text{CDCl}_3$ ):  $\delta$  (ppm) = 7.94 (dd, 1H,  $J$  = 8.0, 3.0 Hz), 7.59-7.57 (m, 2H), 7.38-7.34 (m, 4H), 7.32-7.28 (m, 2H), 7.28-7.24 (m, 3H), 7.10 (dd, 1H,  $J$  = 9.0, 4.0 Hz), 5.39 (s, 2H), 5.36 (s, 2H).

$^{13}\text{C}$  NMR (125 MHz,  $\text{CDCl}_3$ ):  $\delta$  (ppm) = 161.1, 161.0, 159.4, 157.5, 151.3, 136.9, 136.5 (d,  $J_{\text{CF}}$  = 2.1 Hz), 135.5, 129.2, 128.6, 127.9 (d,  $J_{\text{CF}}$  = 5.1 Hz), 126.5, 123.0 (d,  $J_{\text{CF}}$  = 23.8 Hz), 117.2 (d,  $J_{\text{CF}}$  = 7.6 Hz), 116.6 (d,  $J_{\text{CF}}$  = 7.6 Hz), 114.8 (d,  $J_{\text{CF}}$  = 23.9 Hz), 47.9, 45.5.

$^{19}\text{F}$  NMR (470 MHz,  $\text{CDCl}_3$ ):  $\delta$  (ppm) = -118.8.

HRMS (EI):  $m/z$  calcd for  $\text{C}_{22}\text{H}_{18}\text{FN}_2\text{O}_2$   $[\text{M}+\text{H}]^+$  361.1346, found 361.1346.

### 1,3-dibenzyl-7-bromoquinazoline-2,4(1H,3H)-dione (5l)

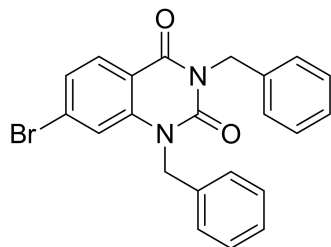

White solid, yield = 73%, 77 mg.

$^1\text{H}$  NMR (500 MHz,  $\text{CDCl}_3$ ):  $\delta$  (ppm) = 8.11 (d, 1H,  $J$  = 8.5 Hz), 7.57-7.55 (m, 2H), 7.39-7.30 (m, 8H), 7.28-7.26 (m, 2H), 5.34 (s, 4H).

$^{13}\text{C}$  NMR (125 MHz,  $\text{CDCl}_3$ ):  $\delta$  (ppm) = 161.3, 151.4, 140.9, 136.8, 135.2, 130.7, 130.2, 129.3, 129.2, 128.7, 128.1, 127.9, 126.68, 126.64, 117.6, 114.7, 47.7, 45.4.  
HRMS (EI):  $m/z$  calcd for  $\text{C}_{22}\text{H}_{18}\text{BrN}_2\text{O}_2$   $[\text{M}+\text{H}]^+$  421.0546, found 421.0547.

### 1,3-dibenzyl-6,7-dimethoxyquinazoline-2,4(1H,3H)-dione (5m)

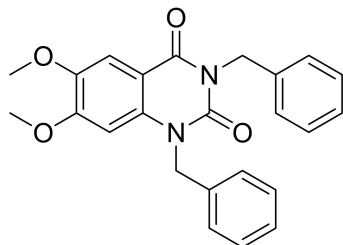

Translucent oil, yield = 73%, 73 mg.

$^1\text{H}$  NMR (500 MHz,  $\text{CDCl}_3$ ):  $\delta$  (ppm) = 7.62 (s, 1H), 7.58-7.56 (m, 2H), 7.36-7.33 (m, 4H), 7.30-7.26 (m, 4H), 6.54 (s, 1H), 5.38 (s, 2H), 5.36 (s, 2H), 3.92 (s, 3H), 3.76 (s, 3H).

$^{13}\text{C}$  NMR (125 MHz,  $\text{CDCl}_3$ ):  $\delta$  (ppm) = 161.5, 155.0, 151.8, 145.7, 137.3, 136.1, 135.7, 129.1, 129.0, 128.5, 127.9, 127.6, 126.6, 109.0, 108.2, 97.7, 56.3, 56.2, 47.9, 45.2.

HRMS (EI):  $m/z$  calcd for  $\text{C}_{24}\text{H}_{23}\text{N}_2\text{O}_4$   $[\text{M}+\text{H}]^+$  403.1652, found 403.1653.

### 1,3-dibenzyl-6-bromo-7-chloroquinazoline-2,4(1H,3H)-dione (5n)

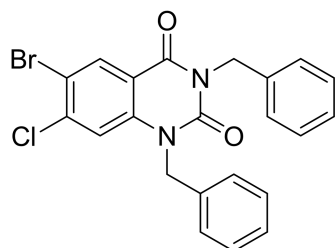

White, solid = 59%, 67 mg.

$^1\text{H}$  NMR (500 MHz,  $\text{CDCl}_3$ ):  $\delta$  (ppm) = 8.29 (s, 1H), 7.56-7.54 (m, 2H), 7.43 (s, 1H), 7.39-7.31 (m, 6H), 7.26-7.24 (m, 2H), 5.33 (s, 4H).

$^{13}\text{C}$  NMR (125 MHz,  $\text{CDCl}_3$ ):  $\delta$  (ppm) = 160.4, 151.1, 138.9, 136.6, 134.9, 130.3, 130.1, 129.7, 129.4, 129.2, 128.7, 128.2, 128.0, 126.6, 119.9, 116.2, 47.9, 45.6.

HRMS (EI):  $m/z$  calcd for  $\text{C}_{22}\text{H}_{17}\text{BrClN}_2\text{O}_2$   $[\text{M}+\text{H}]^+$  455.0156, found 455.0140.

### 1,3-dibenzyl-6,8-difluoroquinazoline-2,4(1H,3H)-dione (5o)

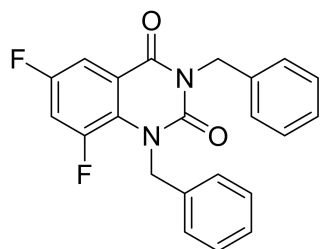

Translucent oil, yield = 74%, 70 mg.



$^1\text{H}$  NMR (500 MHz,  $\text{CDCl}_3$ ):  $\delta$  (ppm) = 7.60-7.59 (m, 2H), 7.39-7.31 (m, 6H), 7.25-7.23 (m, 2H), 6.68-6.62 (m, 2H), 5.33 (s, 2H), 5.32 (s, 2H).

$^{13}\text{C}$  NMR (125 MHz,  $\text{CDCl}_3$ ):  $\delta$  (ppm) = 167.4 (d,  $J_{\text{CF}} = 15.1$  Hz), 165.4 (dd,  $J_{\text{CF}} = 4.6$  Hz,  $J_{\text{CF}} = 4.6$  Hz), 163.2 (d,  $J_{\text{CF}} = 15.4$  Hz), 158.1 (d,  $J_{\text{CF}} = 4.5$  Hz), 151.1, 143.1 (dd,  $J_{\text{CF}} = 4.3$  Hz,  $J_{\text{CF}} = 4.3$  Hz), 136.7, 134.8, 129.5, 129.3, 128.6, 128.2 (d,  $J_{\text{CF}} = 23.1$  Hz), 126.5, 102.7 (dd,  $J_{\text{CF}} = 2.9$  Hz,  $J_{\text{CF}} = 2.9$  Hz), 100.1 (t,  $J_{\text{CF}} = 25.4$  Hz), 98.3 (dd,  $J_{\text{CF}} = 4.0$  Hz,  $J_{\text{CF}} = 4.0$  Hz), 48.4, 45.1.

$^{19}\text{F}$  NMR (470 MHz,  $\text{CDCl}_3$ ):  $\delta$  (ppm) = -97.1, -103.4.

HRMS (EI):  $m/z$  calcd for  $\text{C}_{22}\text{H}_{17}\text{F}_2\text{N}_2\text{O}_2$   $[\text{M}+\text{H}]^+$  379.1252, found 379.1252.

### 1,3-dibenzyl-6-(benzyloxy)quinazoline-2,4(1H,3H)-dione (5p)

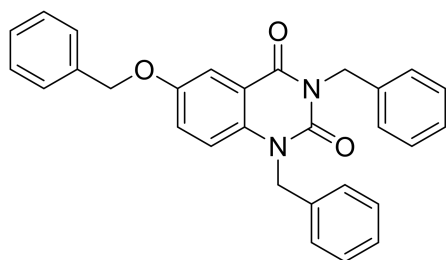

Colorless oil, yield = 31%, 36 mg.

$^1\text{H}$  NMR (500 MHz,  $\text{CDCl}_3$ ):  $\delta$  (ppm) = 7.80 (d, 1H,  $J = 3.0$  Hz), 7.59-7.57 (m, 2H), 7.45-7.33 (m, 9H), 7.30-7.28 (m, 2H), 7.26-7.24 (m, 2H), 7.23-7.20 (m, 1H), 7.06 (d, 1H,  $J = 9.0$  Hz), 5.37 (s, 4H), 5.11 (s, 2H).

$^{13}\text{C}$  NMR (125 MHz,  $\text{CDCl}_3$ ):  $\delta$  (ppm) = 161.8, 154.7, 151.4, 137.2, 136.4, 135.9, 134.4, 129.2, 129.1, 128.8, 128.6, 128.4, 127.81, 127.79, 127.75, 126.6, 124.8, 116.6, 116.2, 111.3, 70.7, 47.7, 45.4.

HRMS (EI):  $m/z$  calcd for  $\text{C}_{29}\text{H}_{25}\text{N}_2\text{O}_3$   $[\text{M}+\text{H}]^+$  449.1859, found 449.1861.

### 1-benzyl-3-methylquinazoline-2,4(1H,3H)-dione (5q)

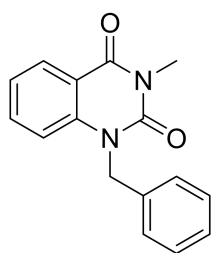

White solid, yield = 95%, 63 mg.

$^1\text{H}$  NMR (500 MHz,  $\text{CDCl}_3$ ):  $\delta$  (ppm) = 8.26 (dd, 1H,  $J = 8.0, 1.5$  Hz), 7.57-7.54 (m, 1H), 7.36-7.33 (m, 2H), 7.29-7.21 (m, 4H), 7.14 (d, 1H,  $J = 8.5$  Hz), 5.40 (s, 2H), 3.57 (s, 3H).

$^{13}\text{C}$  NMR (125 MHz,  $\text{CDCl}_3$ ):  $\delta$  (ppm) = 162.1, 151.7, 139.9, 135.8, 135.1, 129.1, 129.0, 127.8, 126.6, 123.2, 115.7, 114.5, 47.5, 28.8.

### 3-benzylbenzo[d]thiazol-2(3H)-one<sup>[31]</sup> (7a)

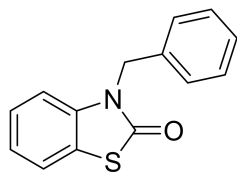

White, solid = 91%, 55 mg.

$^1\text{H}$  NMR (500 MHz,  $\text{CDCl}_3$ ):  $\delta$  (ppm) = 7.46 (dd, 1H,  $J = 1.5$  Hz,  $J = 1.5$  Hz), 7.37-7.30 (m, 5H), 7.26-7.22 (m, 1H), 7.18-7.14 (m, 1H), 6.99 (dd, 1H,  $J = 9.0, 1.0$  Hz), 5.18 (s, 2H).

$^{13}\text{C}$  NMR (125 MHz,  $\text{CDCl}_3$ ):  $\delta$  (ppm) = 170.5, 137.1, 135.3, 129.1, 128.1, 127.3, 126.5, 123.4, 122.8, 111.4, 46.4.

### 3-benzyl-6-bromobenzo[d]thiazol-2(3H)-one (7b)

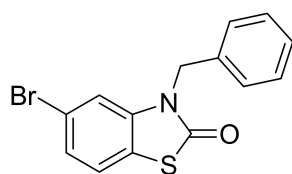

White, solid = 80%, 64 mg.

$^1\text{H}$  NMR (500 MHz,  $\text{CDCl}_3$ ):  $\delta$  (ppm) = 7.40-7.36 (m, 2H), 7.34-7.27 (m, 5H), 7.13 (d, 1H,  $J = 2.0$  Hz), 5.14 (s, 2H).

$^{13}\text{C}$  NMR (125 MHz,  $\text{CDCl}_3$ ):  $\delta$  (ppm) = 170.2, 138.2, 134.7, 129.2, 128.3, 127.3, 126.4, 123.9, 121.7, 120.0, 114.4, 46.5.

HRMS (EI):  $m/z$  calcd for  $\text{C}_{14}\text{H}_{11}\text{BrNOS}$   $[\text{M}+\text{H}]^+$  319.9739, found 319.9739.

### 3-benzyl-6-chlorobenzo[d]thiazol-2(3H)-one (7c)

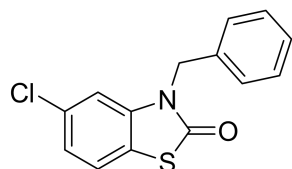

Yellow, solid = 82%, 56 mg.

$^1\text{H}$  NMR (500 MHz,  $\text{CDCl}_3$ ):  $\delta$  (ppm) = 7.39-7.30 (m, 6H), 7.14 (dd, 1H,  $J = 2.0$  Hz,  $J = 2.0$  Hz), 6.99 (d, 1H,  $J = 2.0$  Hz), 5.14 (s, 2H).

$^{13}\text{C}$  NMR (125 MHz,  $\text{CDCl}_3$ ):  $\delta$  (ppm) = 170.4, 138.0, 134.7, 132.5, 129.2, 128.3, 127.2, 123.6, 121.0, 111.7, 46.5.

HRMS (EI):  $m/z$  calcd for  $\text{C}_{14}\text{H}_{11}\text{ClNOS}$   $[\text{M}+\text{H}]^+$  276.0244, found 276.0247.

### 3-benzyl-6-methoxybenzo[d]thiazol-2(3H)-one<sup>[4]</sup> (7d)

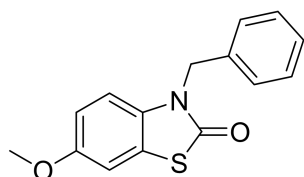

Yellow, solid = 68%, 46 mg.

$^1\text{H}$  NMR (500 MHz,  $\text{CDCl}_3$ ):  $\delta$  (ppm) = 7.36-7.29 (m, 5H), 7.02 (d, 1H,  $J$  = 2.5 Hz), 6.87 (d, 1H,  $J$  = 9.0 Hz), 6.79 (dd, 1H,  $J$  = 9.0, 2.5 Hz), 5.14 (s, 2H), 3.80 (s, 3H).

$^{13}\text{C}$  NMR (125 MHz,  $\text{CDCl}_3$ ):  $\delta$  (ppm) = 170.1, 156.3, 135.4, 130.9, 129.0, 128.0, 127.2, 123.8, 113.0, 112.0, 108.1, 56.0, 46.4.

### 1-benzyl-3-methyl-1,3-dihydro-2H-benzo[d]imidazol-2-one<sup>[5]</sup> (7e)

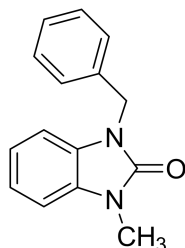

Yellow oil, yield = 60%, 36 mg.

$^1\text{H}$  NMR (500 MHz,  $\text{CDCl}_3$ ):  $\delta$  (ppm) = 7.37-7.32 (m, 4H), 7.30-7.27 (m, 1H), 7.12-7.09 (m, 1H), 7.05-7.00 (m, 2H), 6.91-6.89 (m, 1H), 5.10 (s, 2H), 3.49 (s, 3H).

$^{13}\text{C}$  NMR (125 MHz,  $\text{CDCl}_3$ ):  $\delta$  (ppm) = 154.7, 136.53, 136.52, 130.2, 129.3, 128.9, 127.8, 127.6, 121.4, 108.4, 107.6, 45.0, 27.4.

### 1,3-dibenzyl-4-oxo-3,4-dihydroquinazolin-1-ium bromide (8)

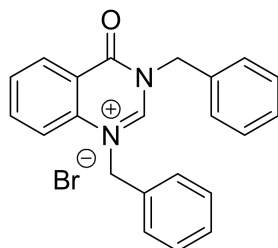

White solid, yield = 73%, 149 mg.

$^1\text{H}$  NMR (500 MHz,  $\text{CD}_3\text{OD}$ ):  $\delta$  = 10.08 (s, 1H), 8.48 (dd, 1H,  $J$  = 8.0, 1.5 Hz), 8.04-8.00 (m, 1H), 7.93 (d, 1H,  $J$  = 9.0 Hz), 7.84 (t, 1H,  $J$  = 7.5 Hz), 7.60-7.58 (m, 2H), 7.50-7.40 (m, 8H), 5.87 (s, 2H), 5.48 (s, 2H).

$^{13}\text{C}$  NMR (125 MHz,  $\text{CD}_3\text{OD}$ ):  $\delta$  = 158.9, 155.1, 138.0, 134.9, 133.6, 131.5, 130.6, 130.4, 130.26, 130.20, 130.1, 130.0, 128.5, 122.0, 120.1, 58.0, 53.7.

HRMS (EI):  $m/z$  calcd for  $\text{C}_{22}\text{H}_{19}\text{NO}$   $[\text{M}-\text{Br}]^+$  327.1491, found 327.1491.

### 3-benzyl-2-(benzyloxy)quinazolin-4(3H)-one (9)

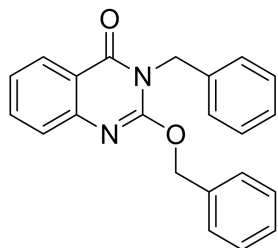

White solid, yield = 70%, 120 mg.

<sup>1</sup>H NMR (500 MHz, CDCl<sub>3</sub>): δ (ppm) = 8.30-8.28 (m, 1H), 7.72-7.68 (m, 1H), 7.56-7.54 (m, 1H), 7.41-7.34 (m, 8H), 7.30-7.28 (m, 3H), 5.52 (s, 2H), 5.34 (s, 2H).

<sup>13</sup>C NMR (125 MHz, CDCl<sub>3</sub>): δ (ppm) = 163.0, 152.3, 147.1, 136.8, 135.3, 134.6, 128.7, 128.66, 128.62, 128.55, 128.49, 127.7, 127.5, 125.7, 124.7, 119.0, 70.3, 44.9.

## References

- [1] Shantharjun, B.; Rajeswari, R.; Vani, D.; Unnava, R.; Sridhar, B.; Reddy, K. R. *Asian J. Org. Chem.*, **2019**, *8*, 2162.
- [2] Piotrowska, D. G.; Andrei, G.; Schols, D.; Snoeck, R.; Łysakowska, M. *Eur. J. Med. Chem.*, **2017**, *126*, 84.
- [3] Yang, Y.; Zhang, X.; Zeng, W.; Huang, H.; Liang, Y. *RSC Adv.*, **2014**, *4*, 6090.
- [4] Roy, G.; Das, R.; Banerjee, M.; Rai, R. K.; Karri, R. *Org. Biomol. Chem.*, **2018**, *16*, 4243.
- [5] Zhuge, J.; Jiang, Z.; Jiang, W.; Histan, G.; Lin, D. *Org. Biomol. Chem.*, **2021**, *19*, 5121.

## Table of crystallographic data for **3i** (CCDC 2189508)

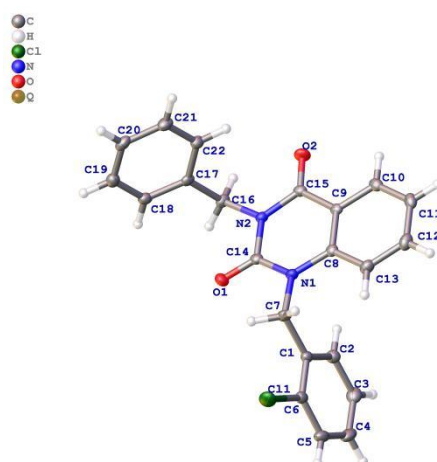

| Complex                            | <b>3i</b>                                                       |
|------------------------------------|-----------------------------------------------------------------|
| Empirical formula                  | C <sub>22</sub> H <sub>17</sub> ClN <sub>2</sub> O <sub>2</sub> |
| Formula weight                     | 376.82                                                          |
| Temperature/K                      | 150.00(10)                                                      |
| Crystal system                     | monoclinic                                                      |
| Space group                        | P2 <sub>1</sub> /c                                              |
| a/Å                                | 12.3628(8)                                                      |
| b/Å                                | 8.7568(5)                                                       |
| c/Å                                | 17.4770(12)                                                     |
| α/°                                | 90                                                              |
| β/°                                | 109.330(7)                                                      |
| γ/°                                | 90                                                              |
| Volume/Å <sup>3</sup>              | 1785.4(2)                                                       |
| Z                                  | 4                                                               |
| ρ <sub>calc</sub> /cm <sup>3</sup> | 1.402                                                           |
| μ/mm <sup>-1</sup>                 | 0.234                                                           |
| F(000)                             | 784.0                                                           |
| Crystal size/mm <sup>3</sup>       | 0.15 × 0.13 × 0.12                                              |
| Radiation                          | Mo Kα (λ = 0.71073)                                             |
| 2θ range for data collection/°     | 4.94 to 49.984                                                  |
| Index ranges                       | -13 ≤ h ≤ 14, -8 ≤ k ≤ 10, -20 ≤ l ≤ 17                         |
| Reflections collected              | 7149                                                            |
| Independent reflections            | 3149 [R <sub>int</sub> = 0.0227, R <sub>sigma</sub> = 0.0318]   |
| Data/restraints/parameters         | 3149/0/244                                                      |
| Goodness-of-fit on F <sup>2</sup>  | 1.101                                                           |
| Final R indexes [I >= 2σ (I)]      | R <sub>1</sub> = 0.0387, wR <sub>2</sub> = 0.0875               |
| Final R indexes [all data]         | R <sub>1</sub> = 0.0474, wR <sub>2</sub> = 0.0930               |

**1,3-dibenzylquinazoline-2,4(1H,3H)-dione (3a)**

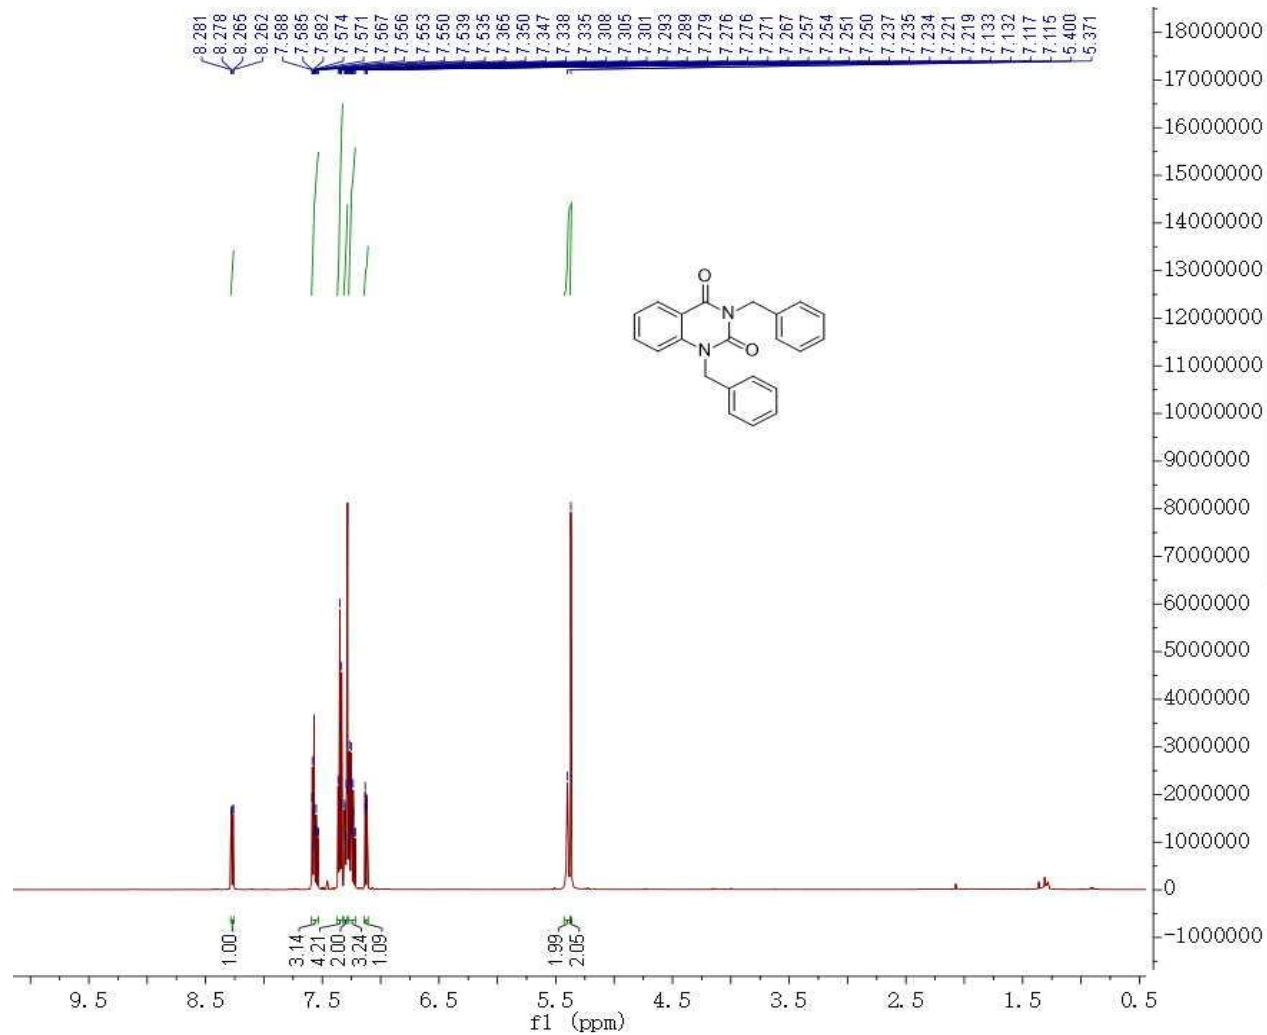

| Parameter           | Value      |
|---------------------|------------|
| 1 Instrument        | Avance NEO |
| 2 Solvent           | CDCl3      |
| 3 Temperature       | 294.6      |
| 4 Pulse Sequence    | zg30       |
| 5 Number of Scans   | 16         |
| 6 Receiver Gain     | 101.0      |
| 7 Relaxation Delay  | 1.0000     |
| 8 Pulse Width       | 9.7200     |
| 9 Spectrometer      | 500.15     |
| Frequency           |            |
| 10 Spectral Width   | 10000.0    |
| 11 Lowest Frequency | -1911.6    |
| 12 Nucleus          | 1H         |
| 13 Acquired Size    | 32768      |
| 14 Spectral Size    | 65536      |

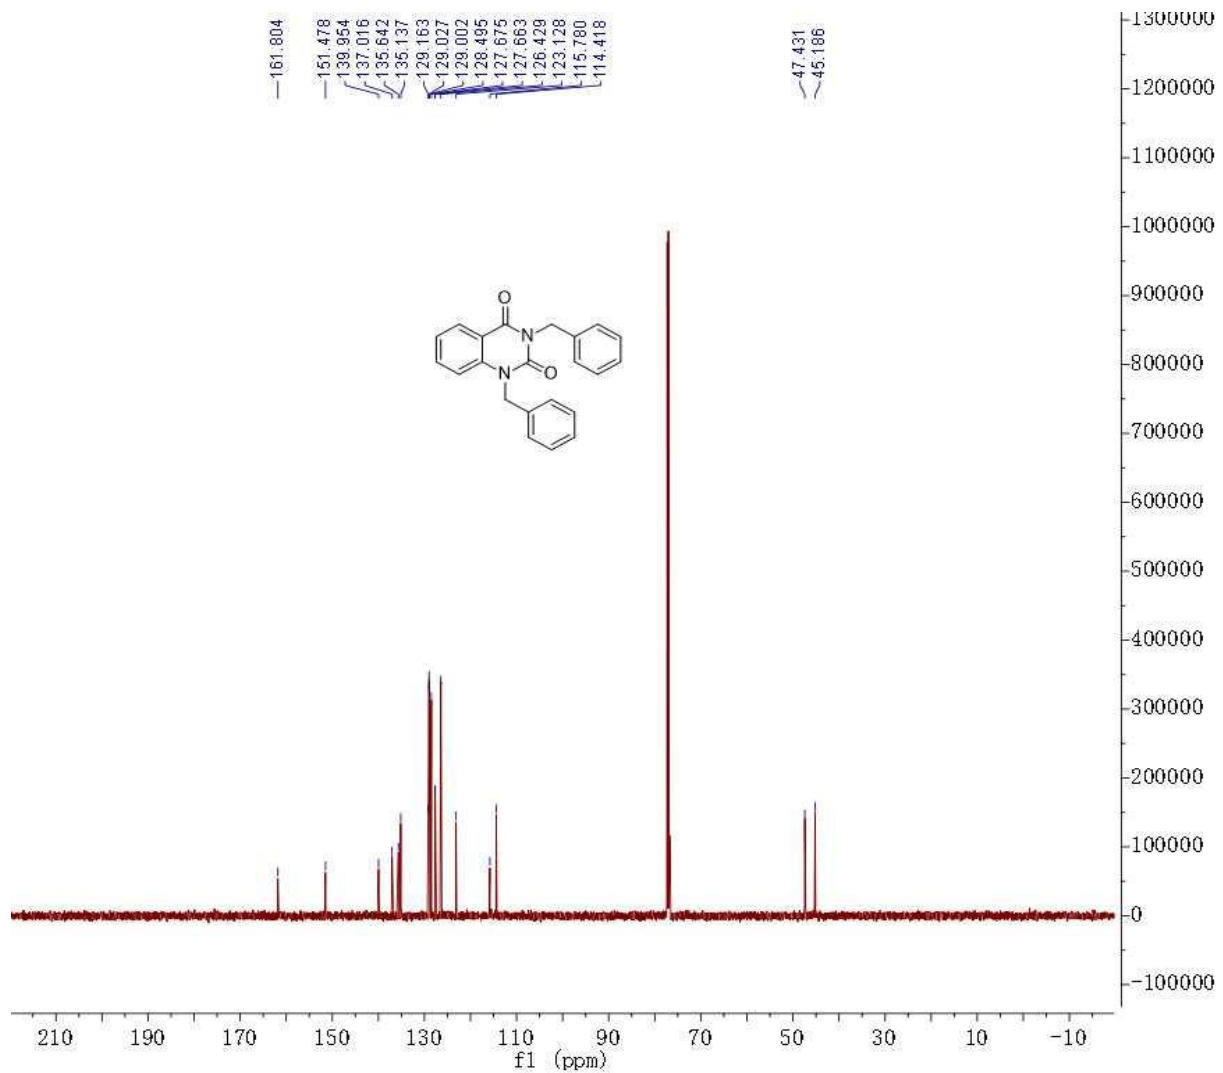

| Parameter                | Value             |
|--------------------------|-------------------|
| 1 Instrument             | Avance NEO 500    |
| 2 Solvent                | CDCl <sub>3</sub> |
| 3 Temperature            | 295.1             |
| 4 Pulse Sequence         | zgpg30            |
| 5 Number of Scans        | 200               |
| 6 Receiver Gain          | 101.0             |
| 7 Relaxation Delay       | 2.0000            |
| 8 Pulse Width            | 10.0000           |
| 9 Spectrometer Frequency | 125.78            |
| 10 Spectral Width        | 30120.5           |
| 11 Lowest Frequency      | -2484.0           |
| 12 Nucleus               | <sup>13</sup> C   |
| 13 Acquired Size         | 32768             |
| 14 Spectral Size         | 65536             |

**3-benzyl-1-(4-methylbenzyl)quinazoline-2,4(1H,3H)-dione (3b)**

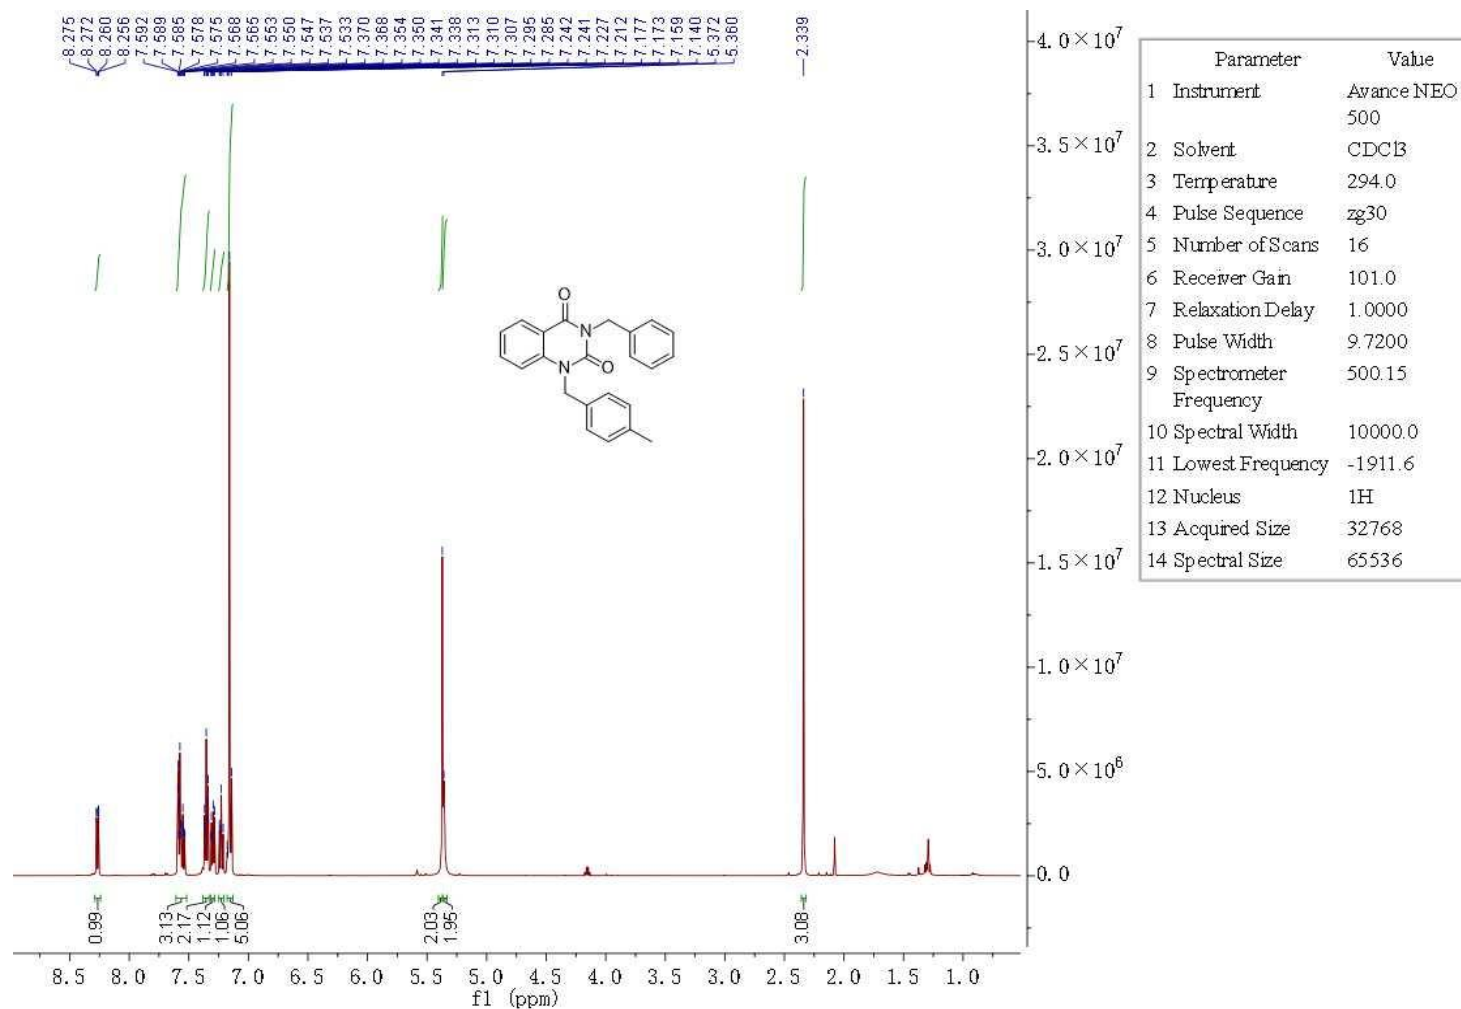



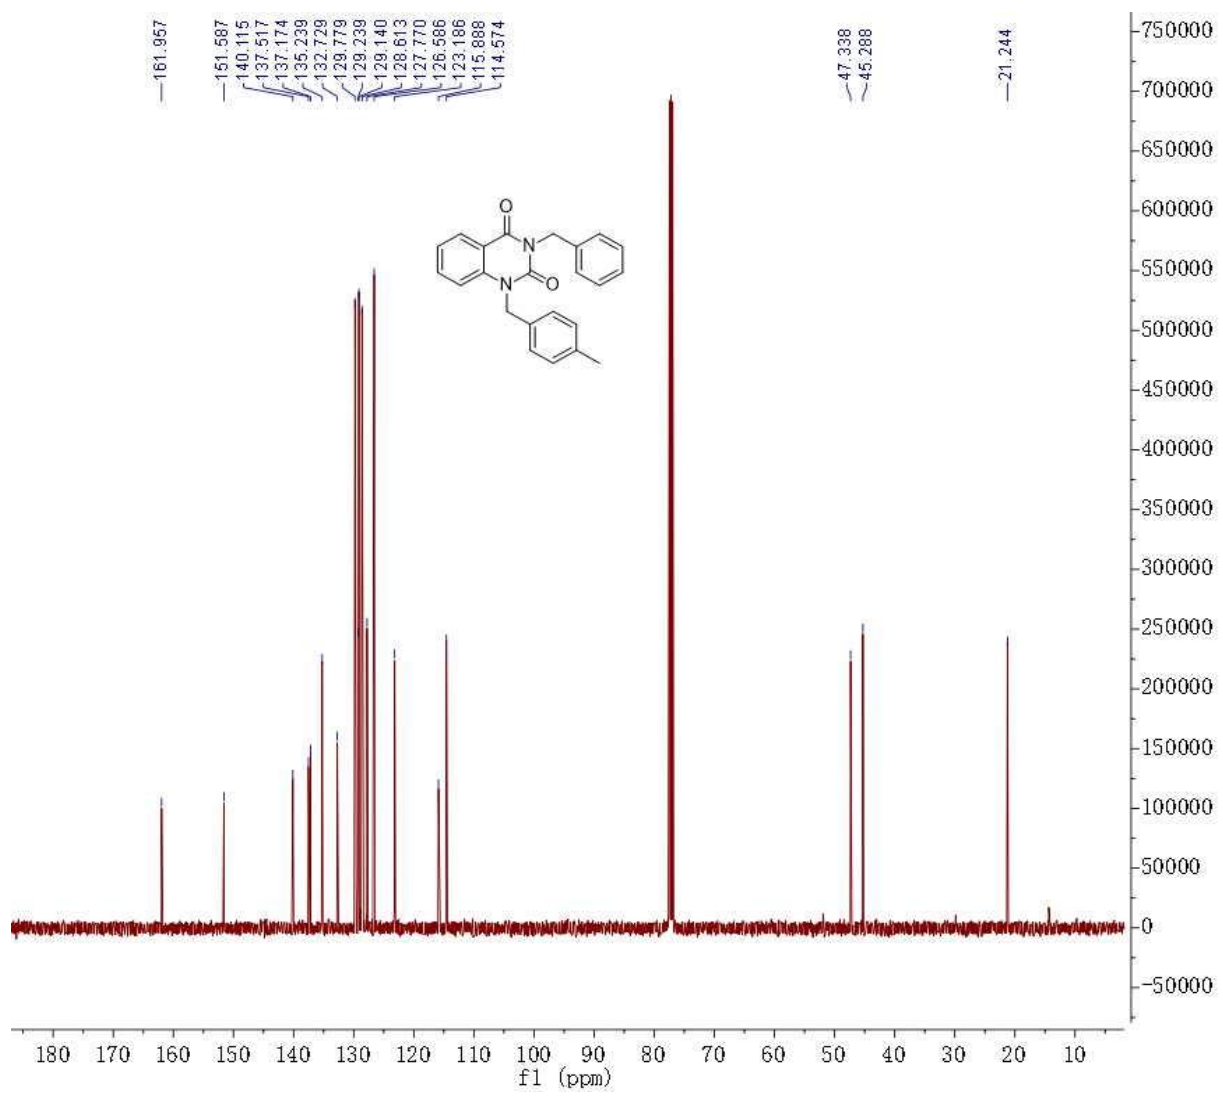

| Parameter                | Value           |
|--------------------------|-----------------|
| 1 Instrument             | Avance NEO      |
| 2 Solvent                | CDCl3           |
| 3 Temperature            | 294.8           |
| 4 Pulse Sequence         | zgpg30          |
| 5 Number of Scans        | 160             |
| 6 Receiver Gain          | 101.0           |
| 7 Relaxation Delay       | 2.0000          |
| 8 Pulse Width            | 10.0000         |
| 9 Spectrometer Frequency | 125.78          |
| 10 Spectral Width        | 30120.5         |
| 11 Lowest Frequency      | -2468.9         |
| 12 Nucleus               | <sup>13</sup> C |
| 13 Acquired Size         | 32768           |
| 14 Spectral Size         | 65536           |

**3-benzyl-1-(4-(tert-butyl)benzyl)quinazoline-2,4(1H,3H)-dione (3c)**

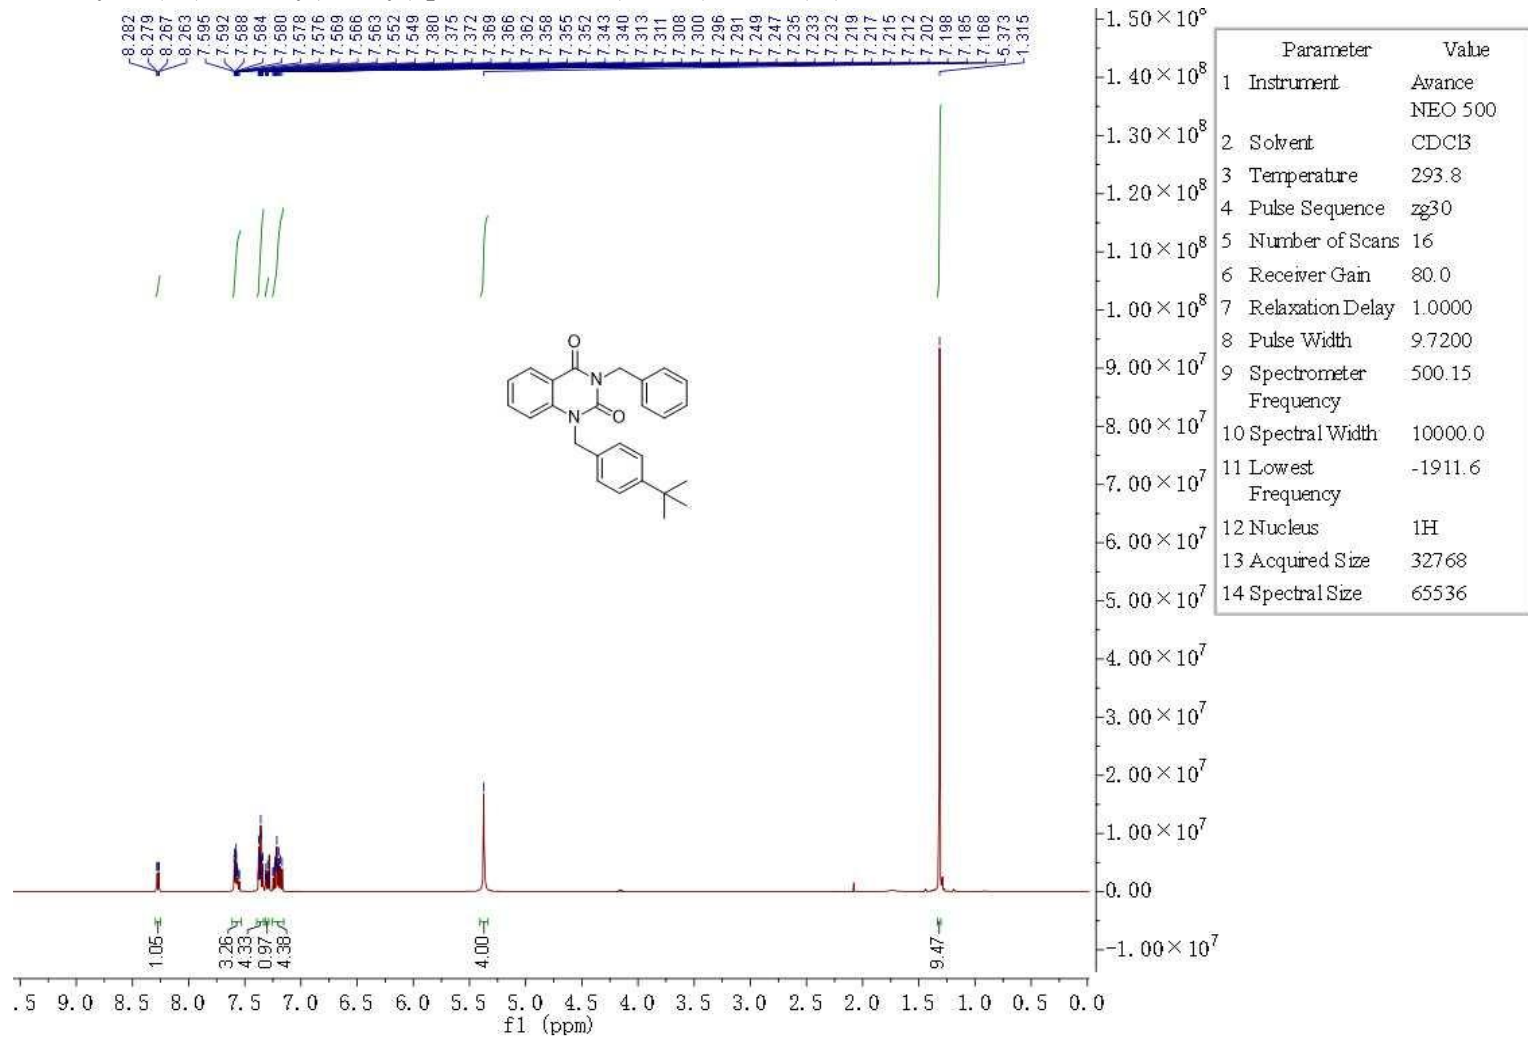

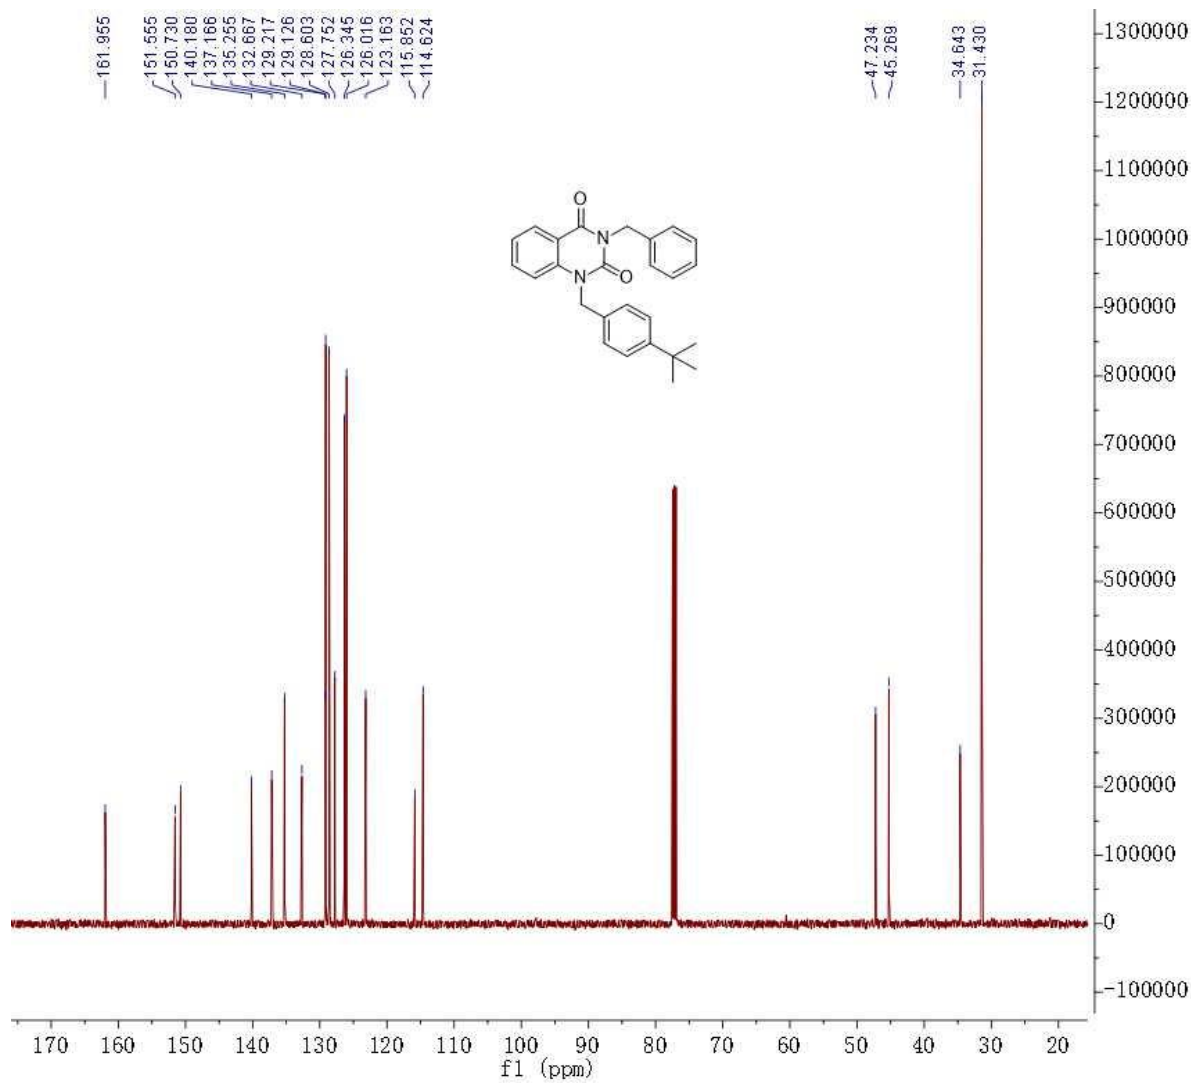

| Parameter           | Value      |
|---------------------|------------|
| 1 Instrument        | Avance NEO |
| 2 Solvent           | CDCl3      |
| 3 Temperature       | 294.7      |
| 4 Pulse Sequence    | zgpg30     |
| 5 Number of Scans   | 160        |
| 6 Receiver Gain     | 101.0      |
| 7 Relaxation Delay  | 2.0000     |
| 8 Pulse Width       | 10.0000    |
| 9 Spectrometer      | 125.78     |
| Frequency           |            |
| 10 Spectral Width   | 30120.5    |
| 11 Lowest Frequency | -2470.8    |
| 12 Nucleus          | 13C        |
| 13 Acquired Size    | 32768      |
| 14 Spectral Size    | 65536      |

3-benzyl-1-(4-fluorobenzyl)quinazoline-2,4(1H,3H)-dione (3d)

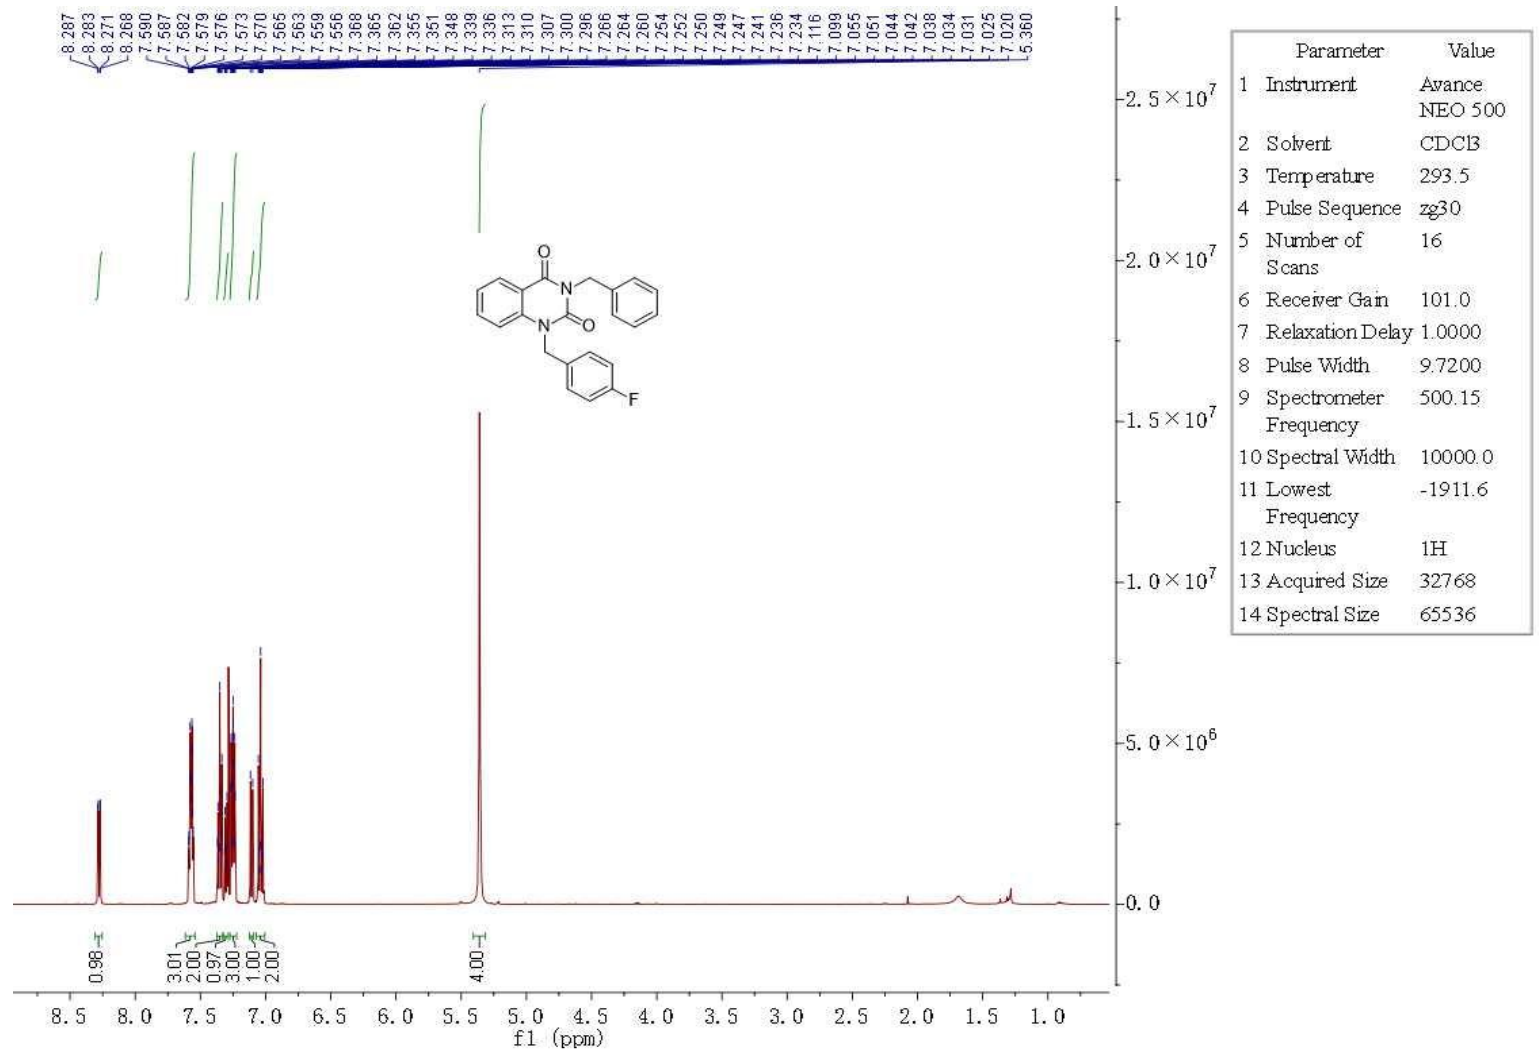

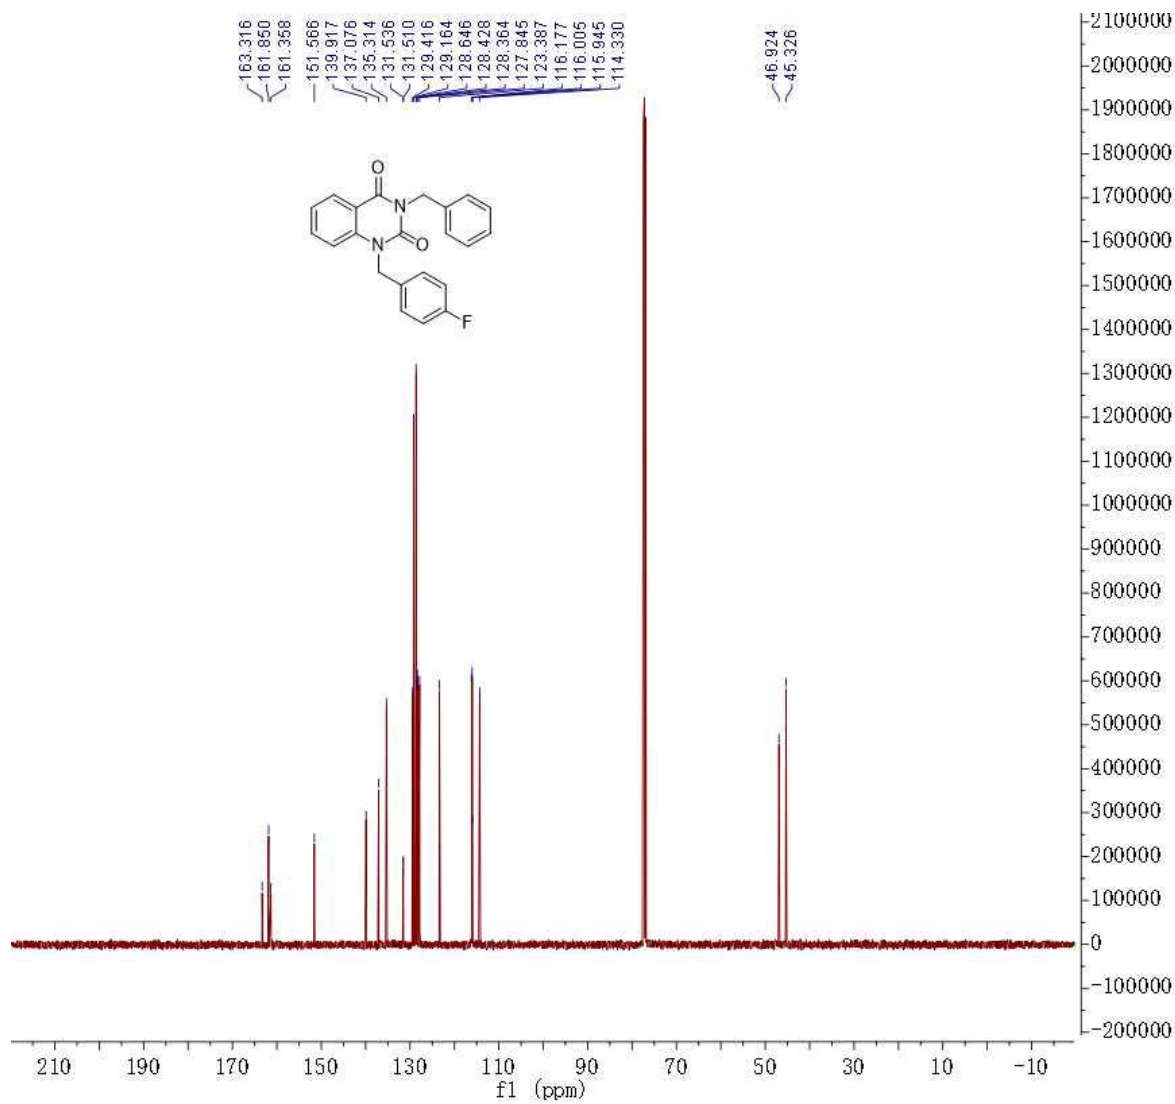

| Parameter           | Value      |
|---------------------|------------|
| 1 Instrument        | Avance NEO |
| 2 Solvent           | CDCl3      |
| 3 Temperature       | 294.5      |
| 4 Pulse Sequence    | zgpg30     |
| 5 Number of Scans   | 400        |
| 6 Receiver Gain     | 101.0      |
| 7 Relaxation Delay  | 2.0000     |
| 8 Pulse Width       | 10.0000    |
| 9 Spectrometer      | 125.78     |
| Frequency           |            |
| 10 Spectral Width   | 30120.5    |
| 11 Lowest Frequency | -2484.0    |
| 12 Nucleus          | 13C        |
| 13 Acquired Size    | 32768      |
| 14 Spectral Size    | 65536      |

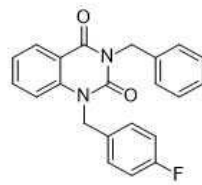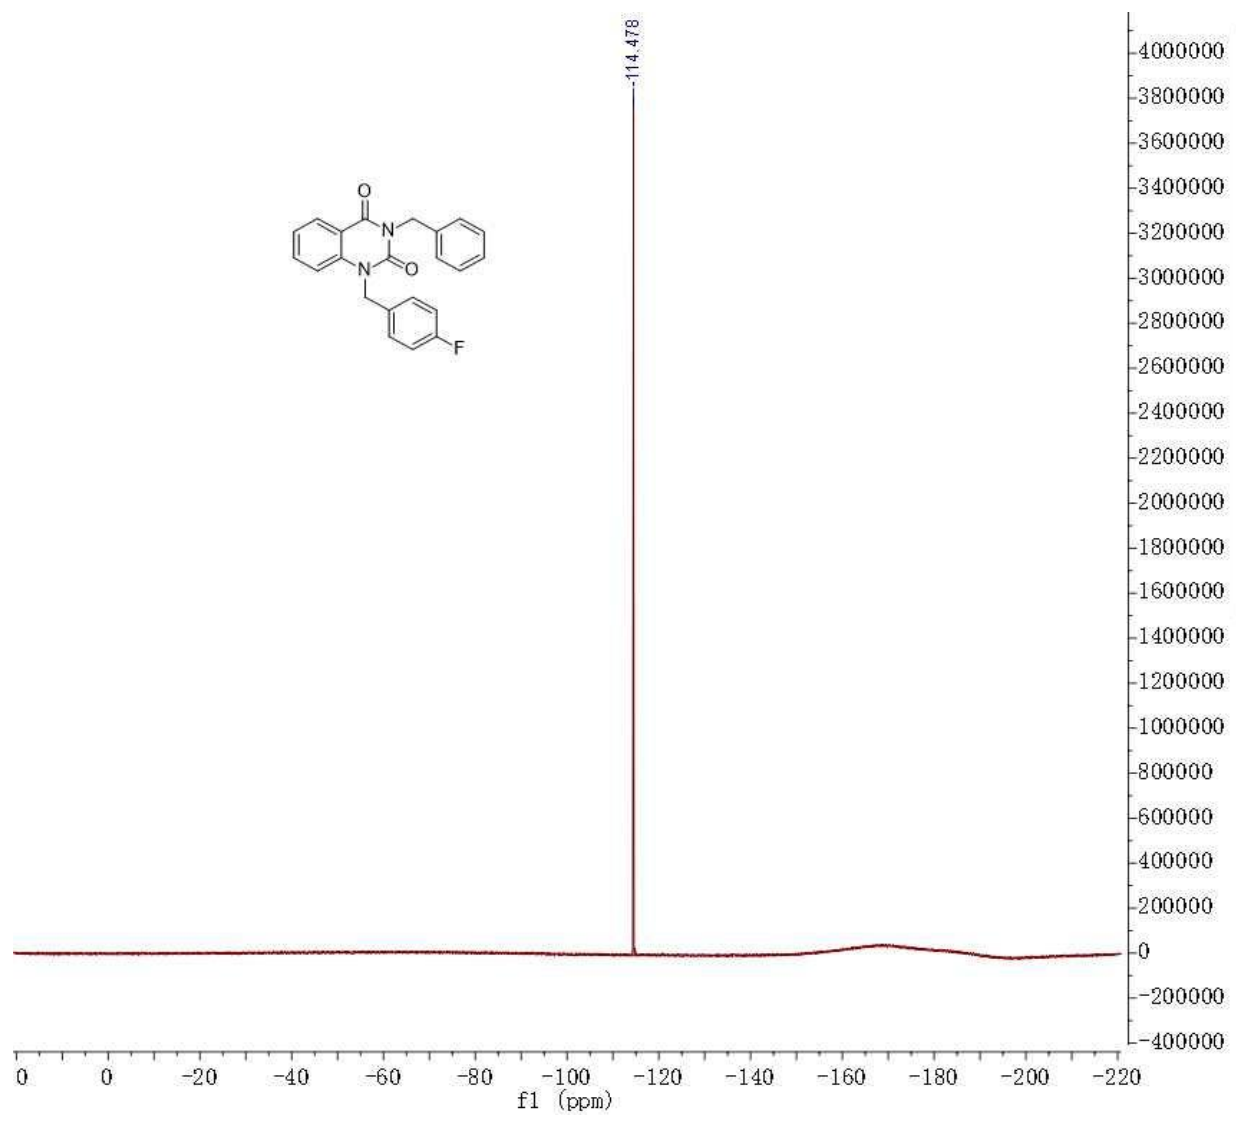

| Parameter                | Value      |
|--------------------------|------------|
| 1 Instrument             | Avance NEO |
| 2 Solvent                | CDCl3      |
| 3 Temperature            | 294.2      |
| 4 Pulse Sequence         | zg         |
| 5 Number of Scans        | 16         |
| 6 Receiver Gain          | 101.0      |
| 7 Relaxation Delay       | 1.0000     |
| 8 Pulse Width            | 15.0000    |
| 9 Spectrometer Frequency | 470.56     |
| 10 Spectral Width        | 113636.4   |
| 11 Lowest Frequency      | -103879.3  |
| 12 Nucleus               | 19F        |
| 13 Acquired Size         | 65536      |
| 14 Spectral Size         | 131072     |

**3-benzyl-1-(4-bromobenzyl)quinazoline-2,4(1H,3H)-dione (3e)**

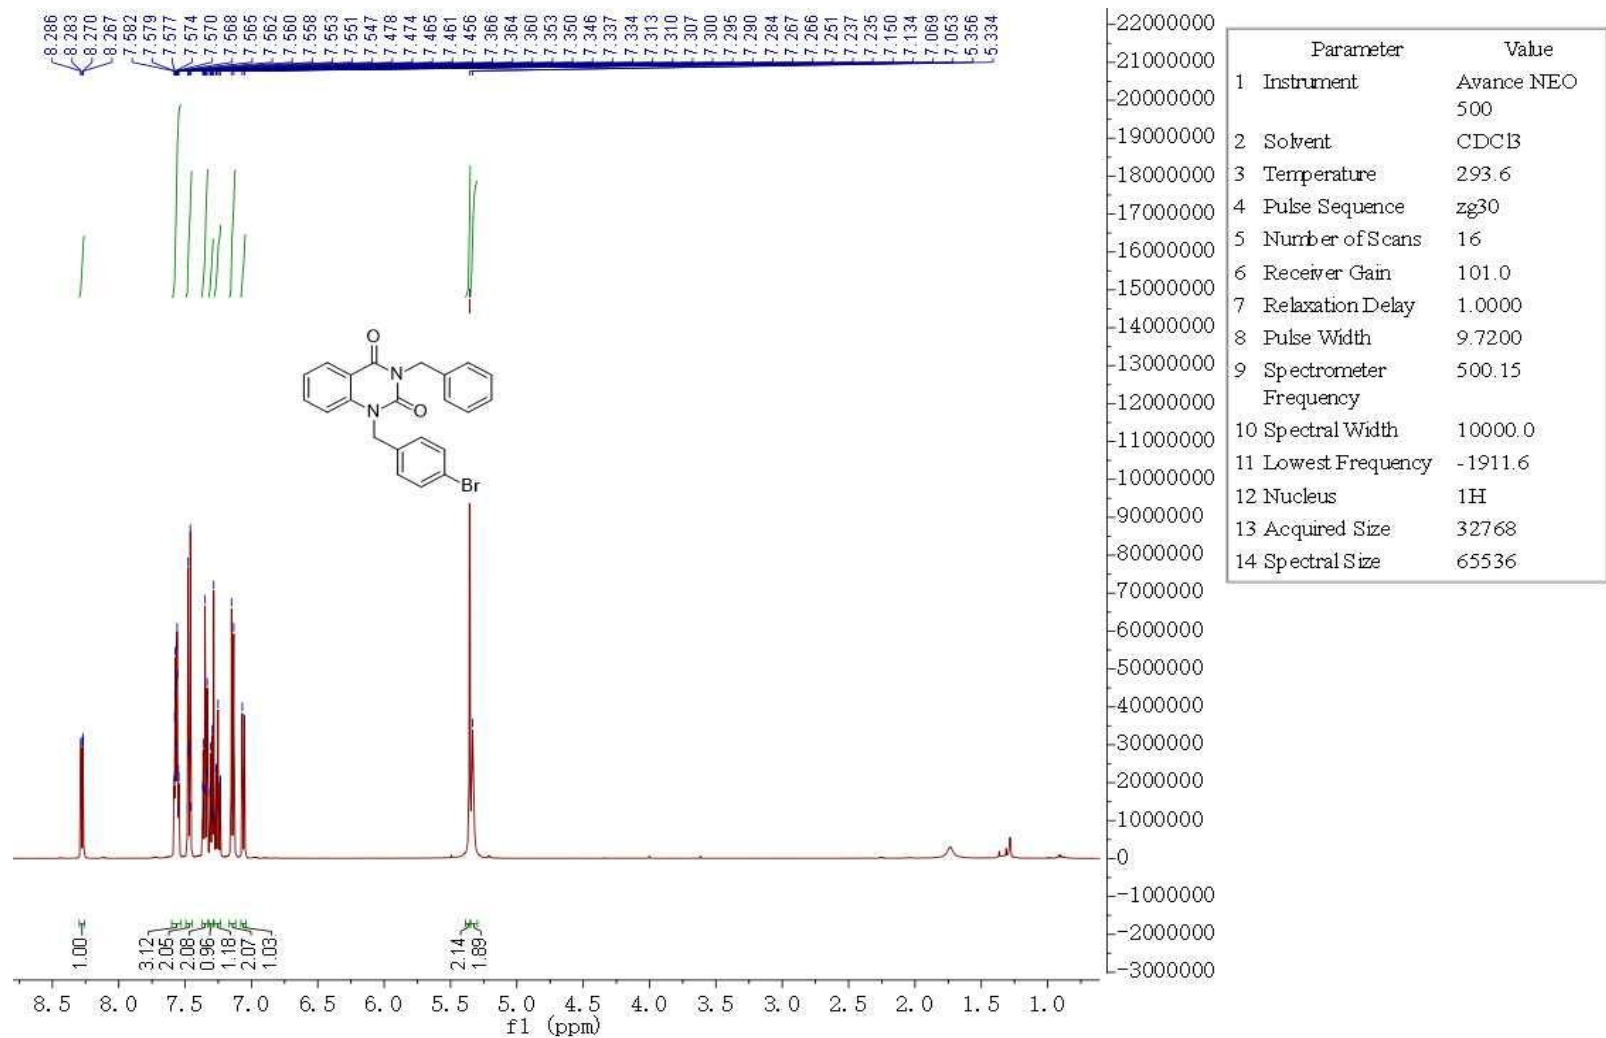



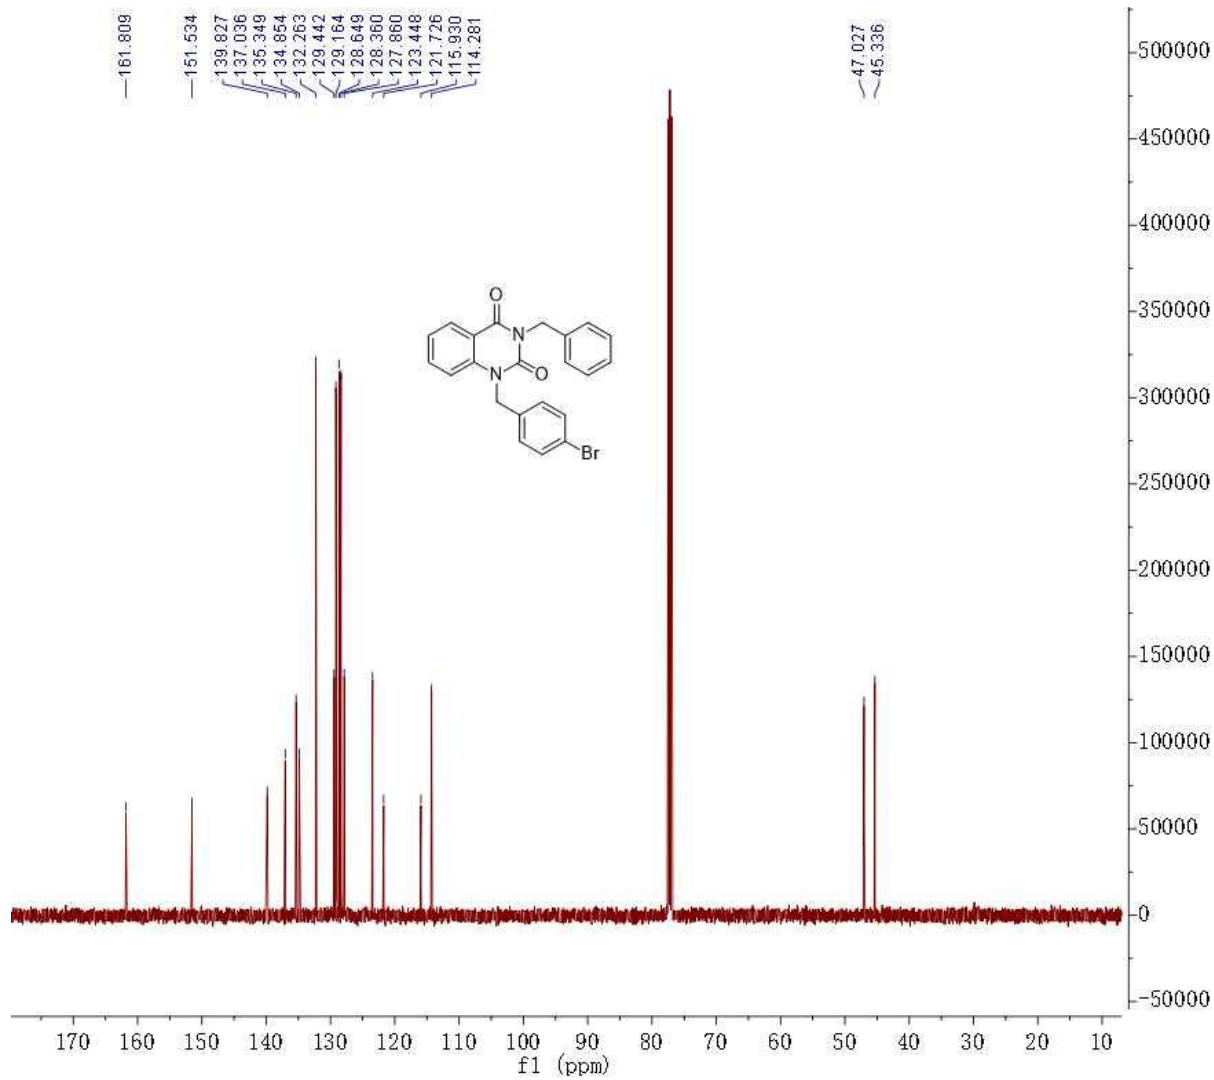

| Parameter                   | Value             |
|-----------------------------|-------------------|
| 1 Instrument                | Avance<br>NEO 500 |
| 2 Solvent                   | DMSO              |
| 3 Temperature               | 294.3             |
| 4 Pulse Sequence            | zgpg30            |
| 5 Number of Scans           | 100               |
| 6 Receiver Gain             | 101.0             |
| 7 Relaxation Delay          | 2.0000            |
| 8 Pulse Width               | 10.0000           |
| 9 Spectrometer<br>Frequency | 125.78            |
| 10 Spectral Width           | 30120.5           |
| 11 Lowest<br>Frequency      | -1870.8           |
| 12 Nucleus                  | <sup>13</sup> C   |
| 13 Acquired Size            | 32768             |
| 14 Spectral Size            | 65536             |



**3-benzyl-1-(4-(trifluoromethyl)benzyl)quinazoline-2,4(1H,3H)-dione (3f)**

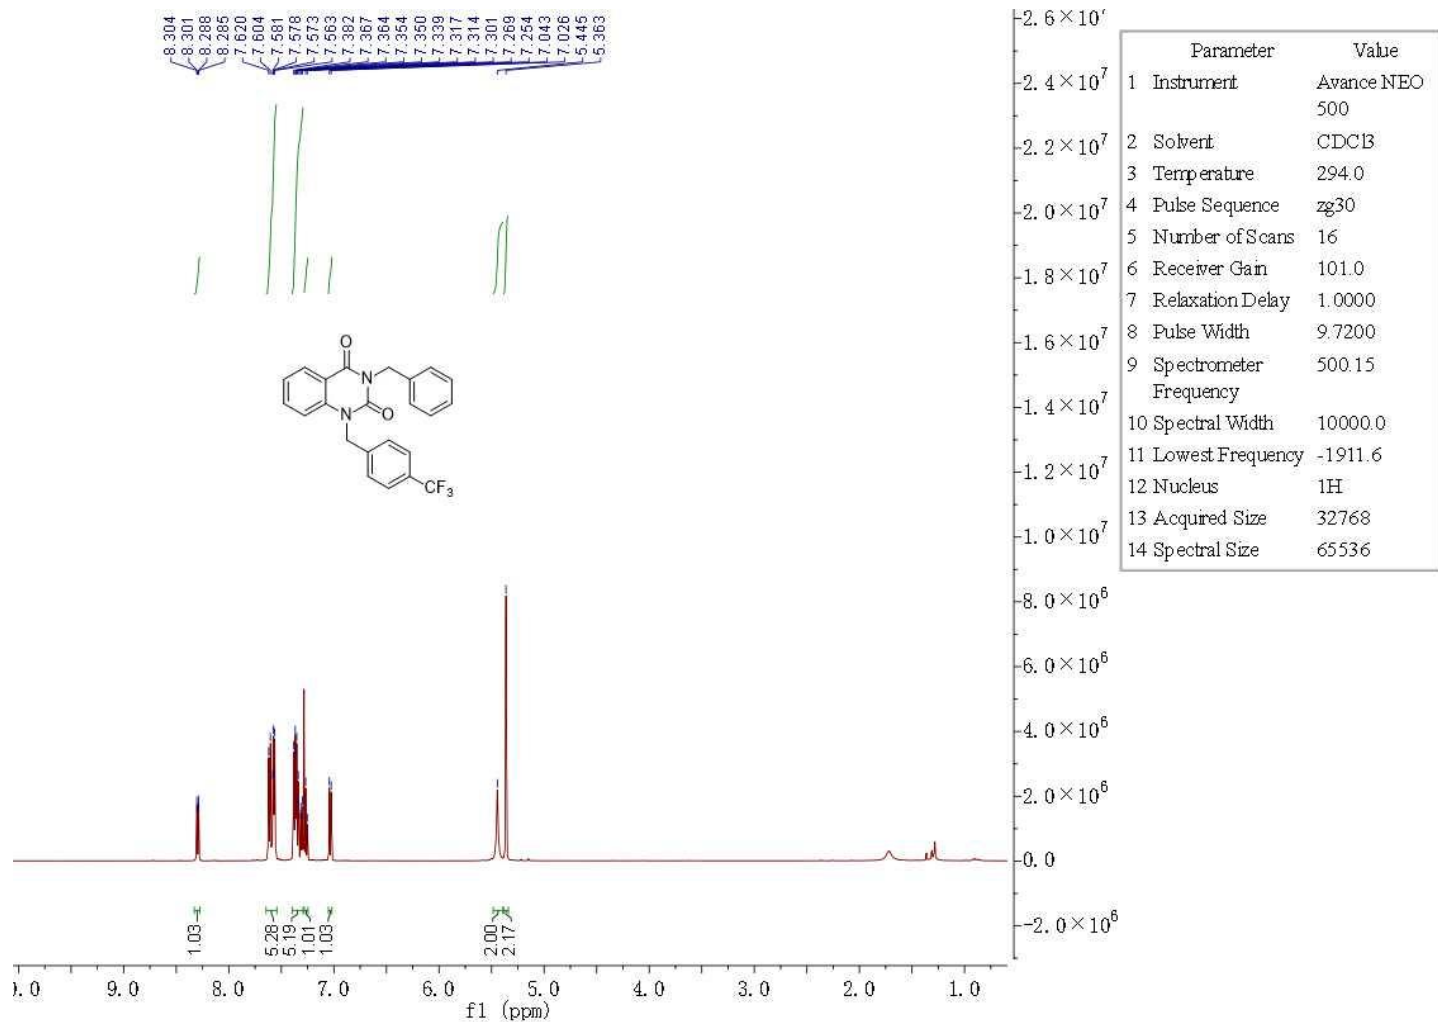

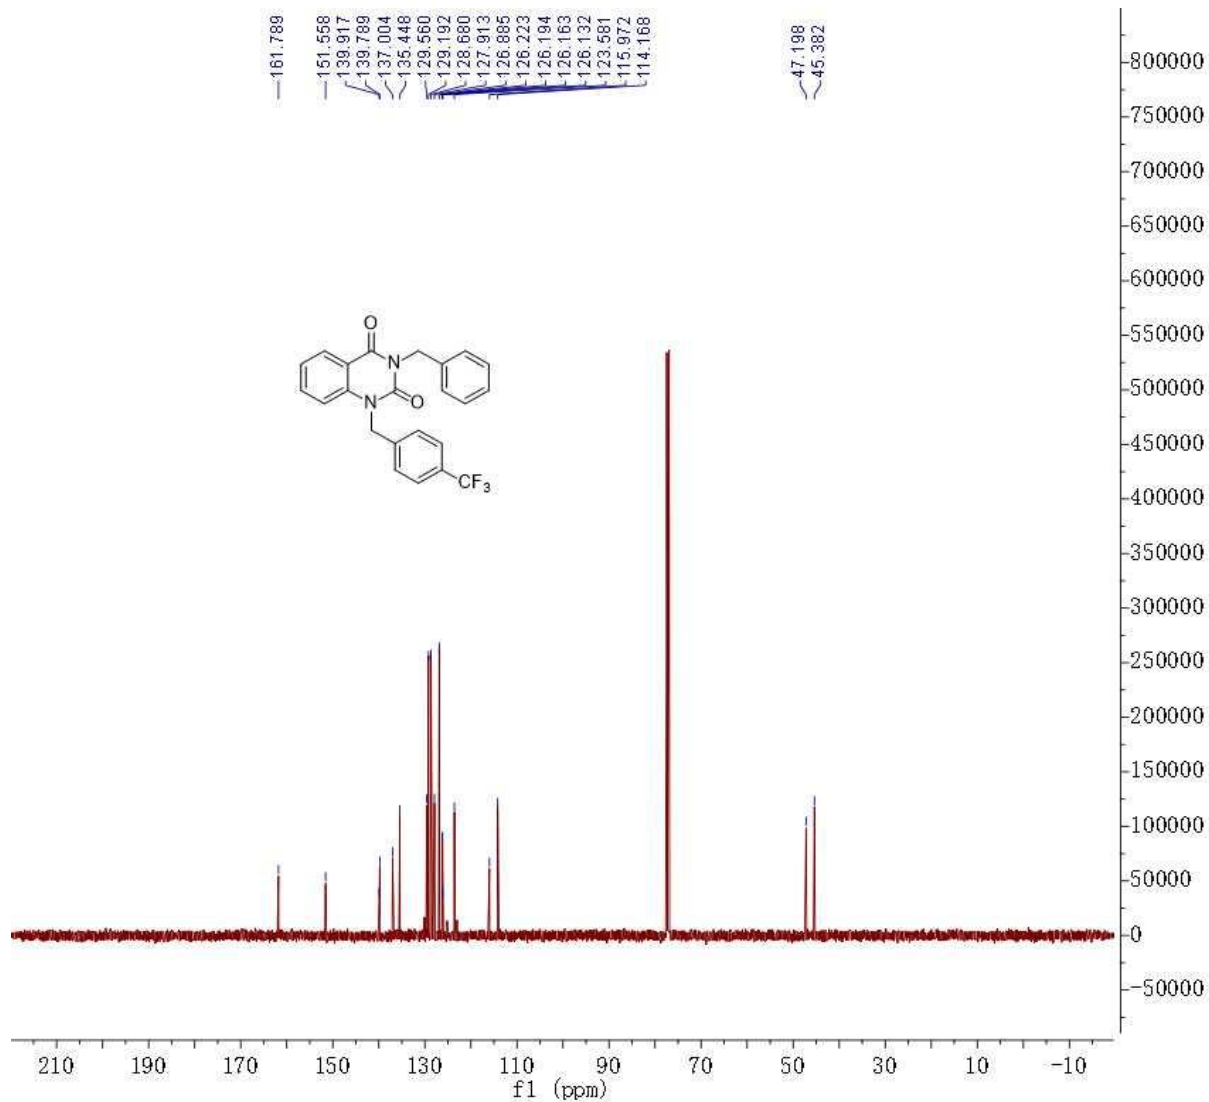

| Parameter                | Value      |
|--------------------------|------------|
| 1 Instrument             | Avance NEO |
| 2 Solvent                | CDCl3      |
| 3 Temperature            | 294.5      |
| 4 Pulse Sequence         | zgpg30     |
| 5 Number of Scans        | 120        |
| 6 Receiver Gain          | 101.0      |
| 7 Relaxation Delay       | 2.0000     |
| 8 Pulse Width            | 10.0000    |
| 9 Spectrometer Frequency | 125.78     |
| 10 Spectral Width        | 30120.5    |
| 11 Lowest Frequency      | -2465.7    |
| 12 Nucleus               | 13C        |
| 13 Acquired Size         | 32768      |
| 14 Spectral Size         | 65536      |

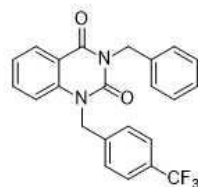

---62.578

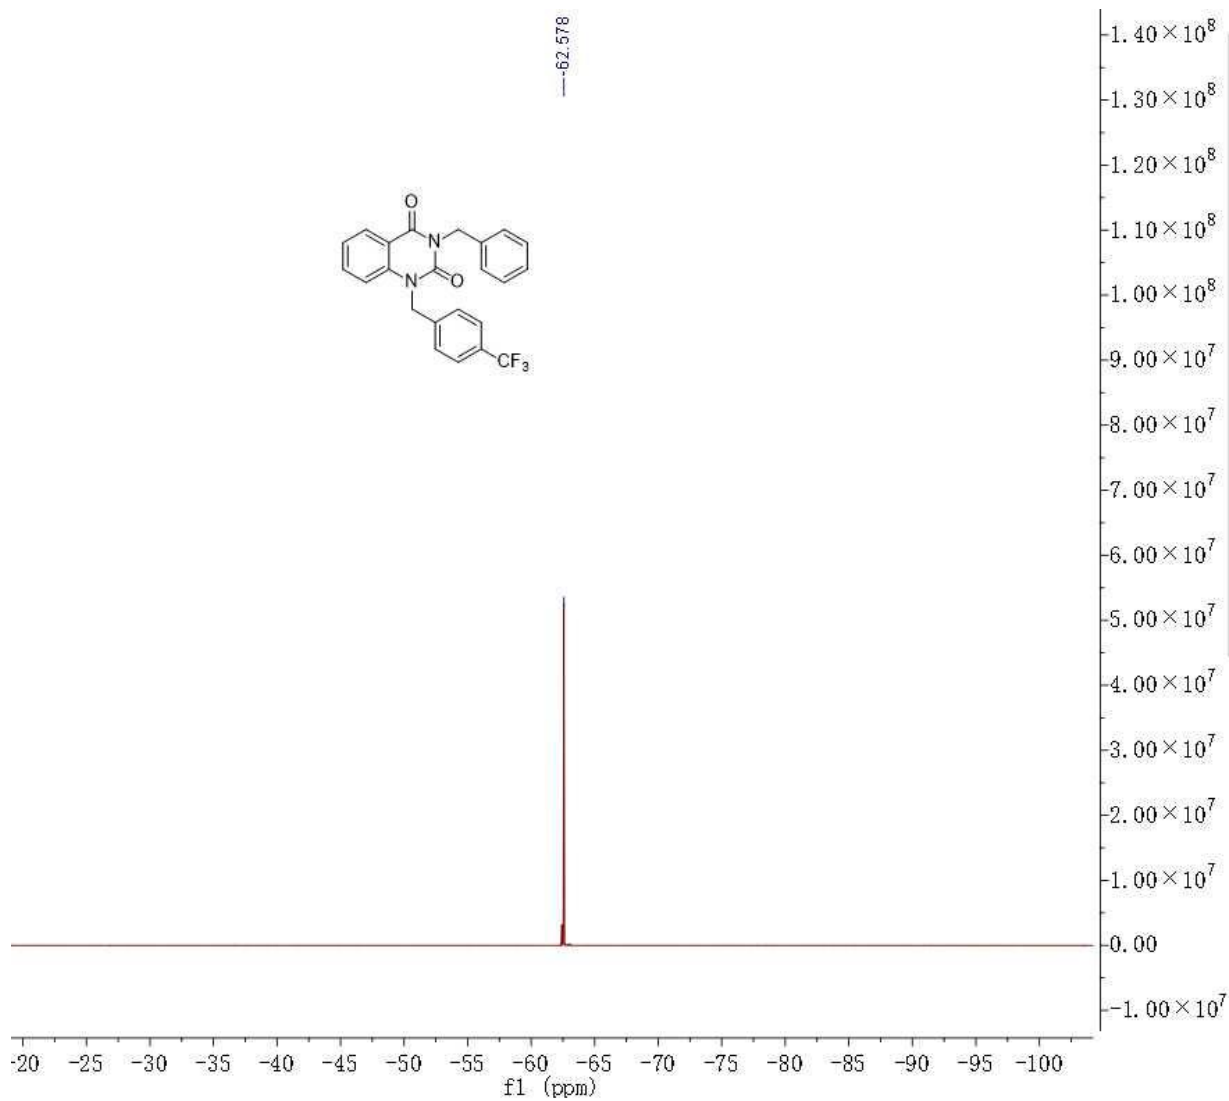

| Parameter                | Value          |
|--------------------------|----------------|
| 1 Instrument             | Avance NEO 500 |
| 2 Solvent                | CDCl3          |
| 3 Temperature            | 293.7          |
| 4 Pulse Sequence         | zg             |
| 5 Number of Scans        | 16             |
| 6 Receiver Gain          | 101.0          |
| 7 Relaxation Delay       | 1.0000         |
| 8 Pulse Width            | 15.0000        |
| 9 Spectrometer Frequency | 470.56         |
| 10 Spectral Width        | 113636.4       |
| 11 Lowest Frequency      | -103879.3      |
| 12 Nucleus               | 19F            |
| 13 Acquired Size         | 65536          |
| 14 Spectral Size         | 131072         |

**3-benzyl-1-(2-methylbenzyl)quinazoline-2,4(1H,3H)-dione (3g)**

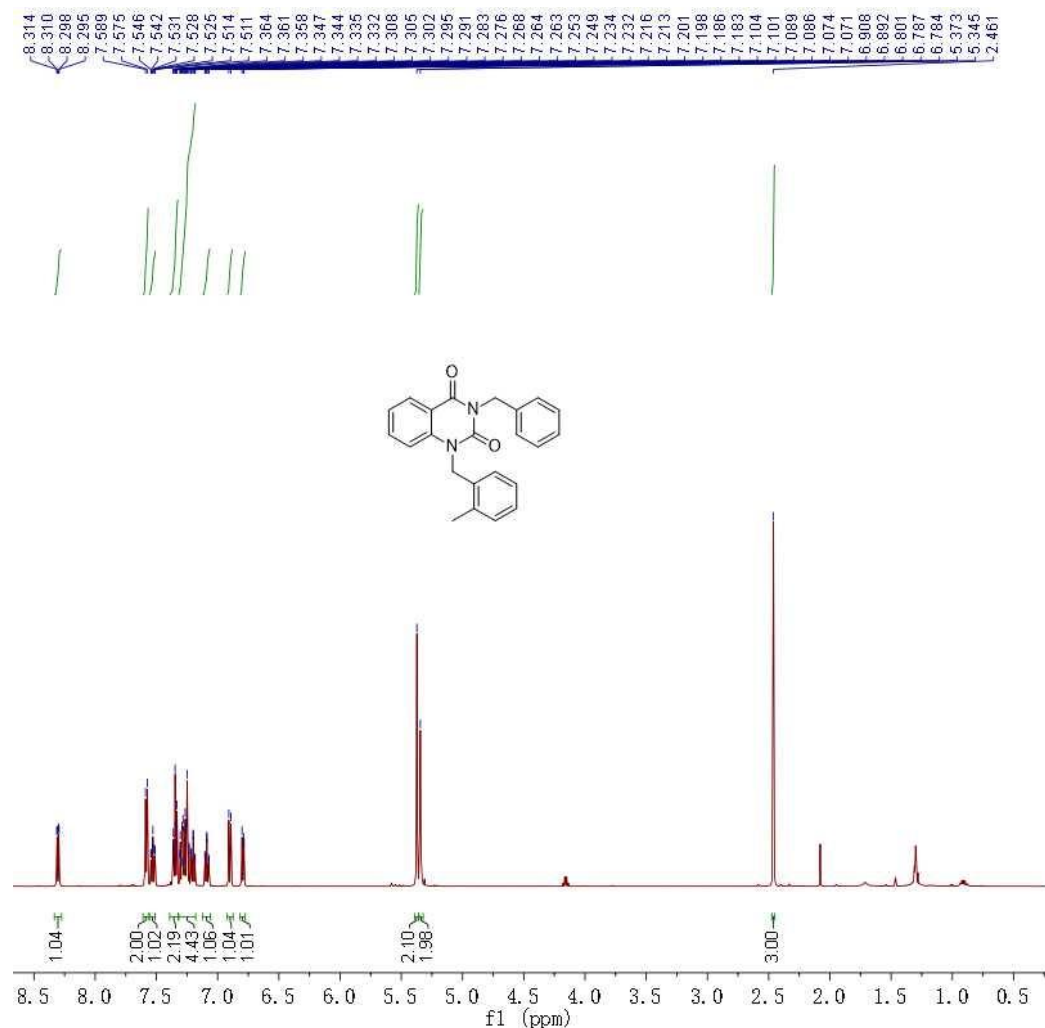

| Parameter          | Value                |
|--------------------|----------------------|
| 1 Instrument       | Avance<br>NEO 500    |
| 2 Solvent          | CDCl3                |
| 3 Temperature      | 297.2                |
| 4 Pulse Sequence   | zg30                 |
| 5 Number of Scans  | 16                   |
| 6 Receiver Gain    | 86.7                 |
| 7 Relaxation Delay | 1.0000               |
| 8 Pulse Width      | 9.7200               |
| 9 Spectrometer     | 500.15<br>Frequency  |
| 10 Spectral Width  | 10000.0              |
| 11 Lowest          | -1911.6<br>Frequency |
| 12 Nucleus         | 1H                   |
| 13 Acquired Size   | 32768                |
| 14 Spectral Size   | 65536                |

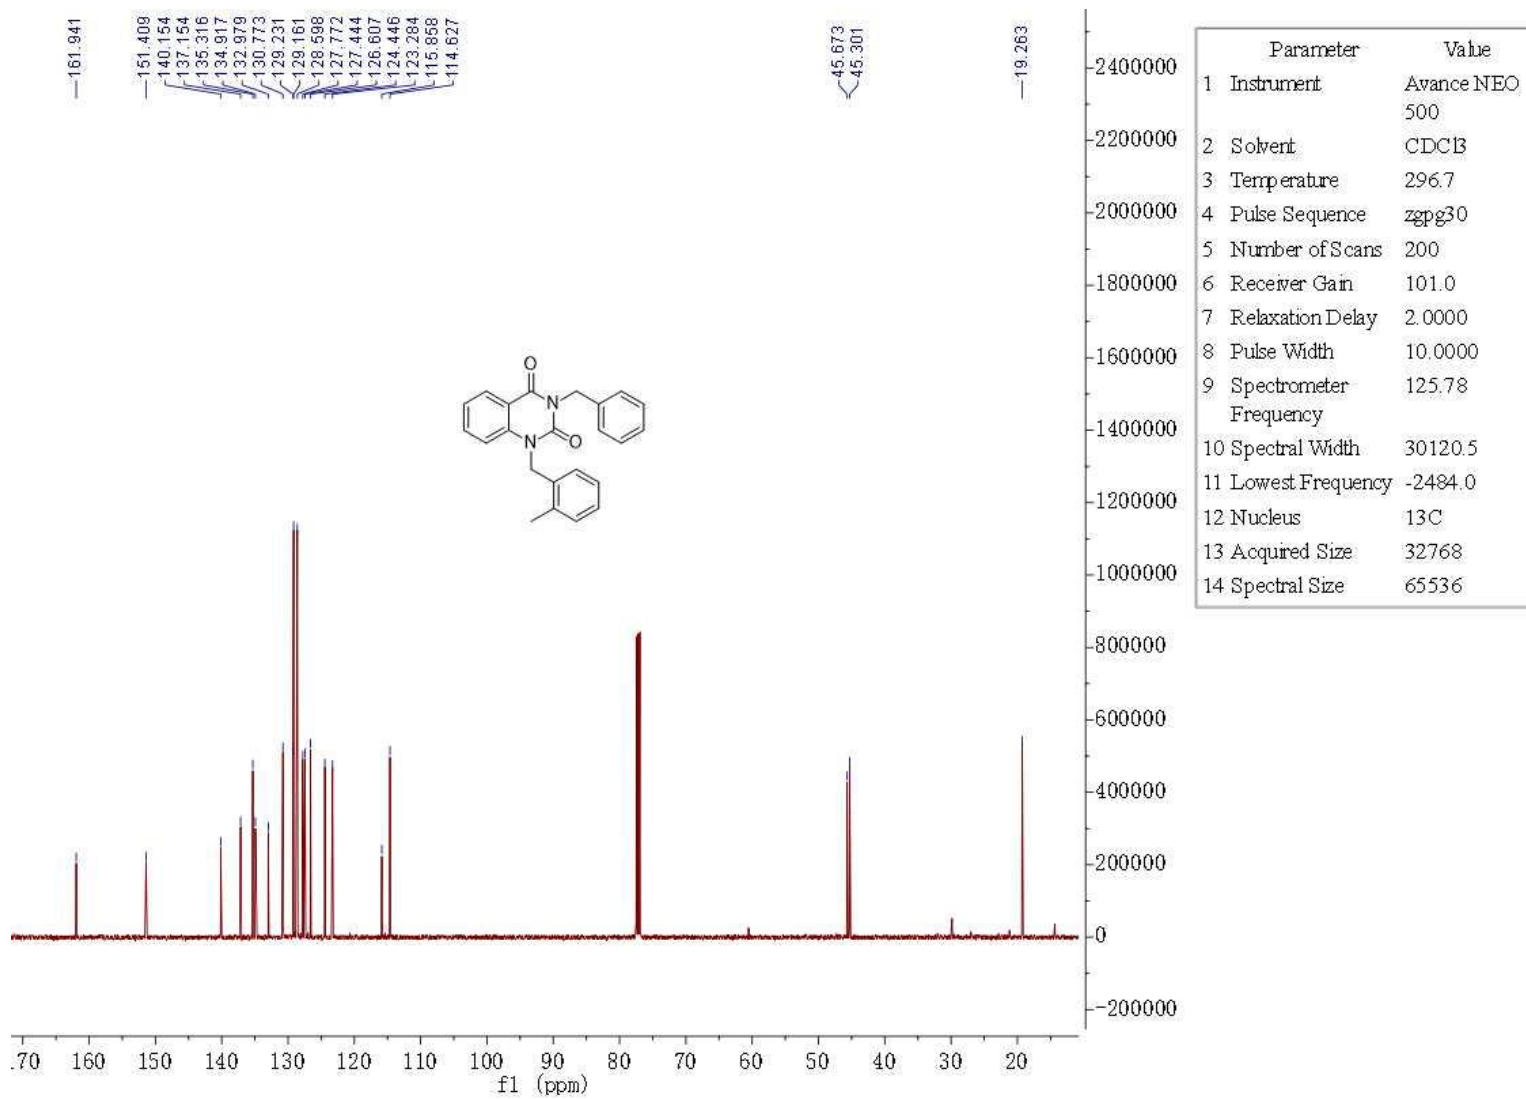

### 3-benzyl-1-(2-fluorobenzyl)quinazoline-2,4(1H,3H)-dione (3h)

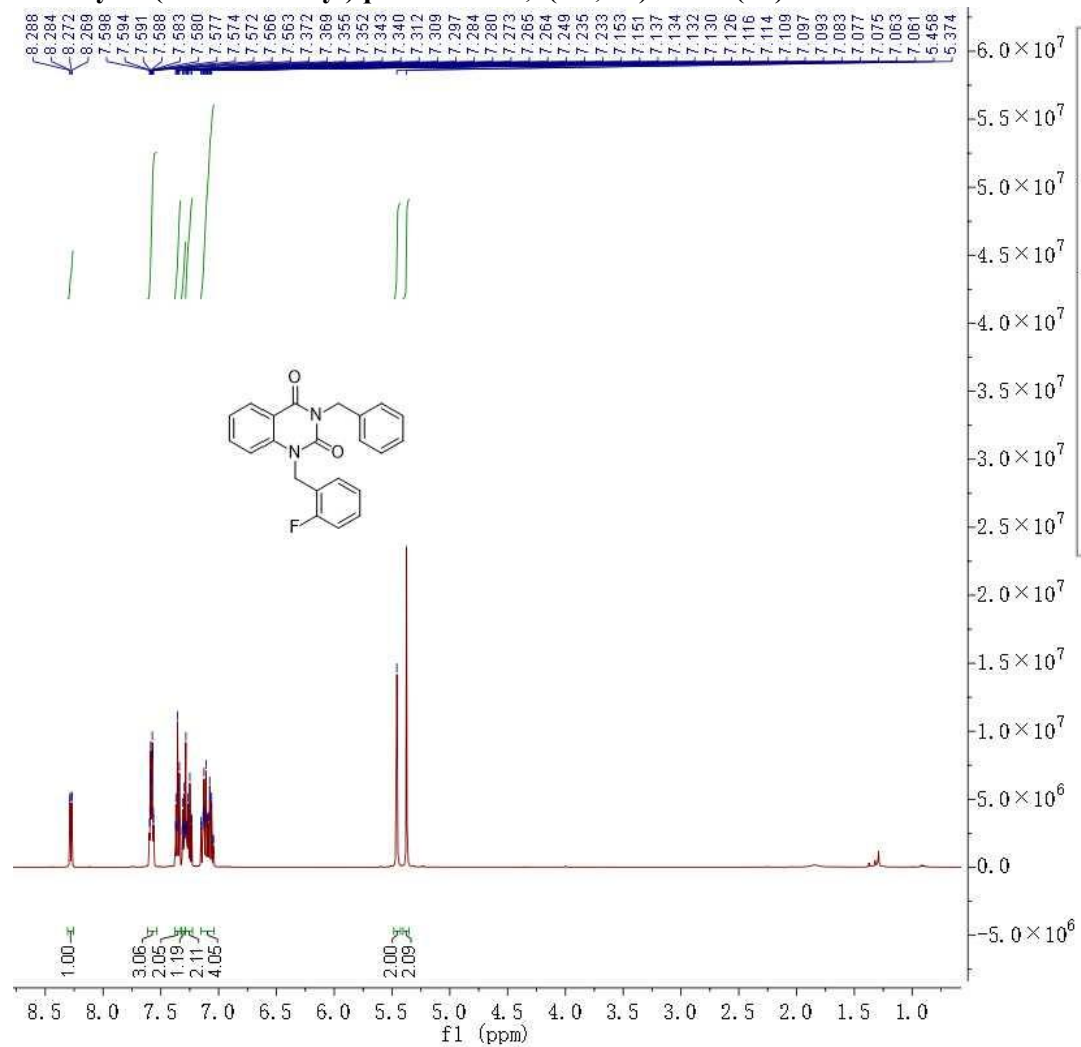

| Parameter           | Value          |
|---------------------|----------------|
| 1 Instrument        | Avance NEO 500 |
| 2 Solvent           | CDCl3          |
| 3 Temperature       | 294.0          |
| 4 Pulse Sequence    | zg30           |
| 5 Number of Scans   | 16             |
| 6 Receiver Gain     | 101.0          |
| 7 Relaxation Delay  | 1.0000         |
| 8 Pulse Width       | 9.7200         |
| 9 Spectrometer      | 500.15         |
| Frequency           |                |
| 10 Spectral Width   | 10000.0        |
| 11 Lowest Frequency | -1911.6        |
| 12 Nucleus          | <sup>1</sup> H |
| 13 Acquired Size    | 32768          |
| 14 Spectral Size    | 65536          |

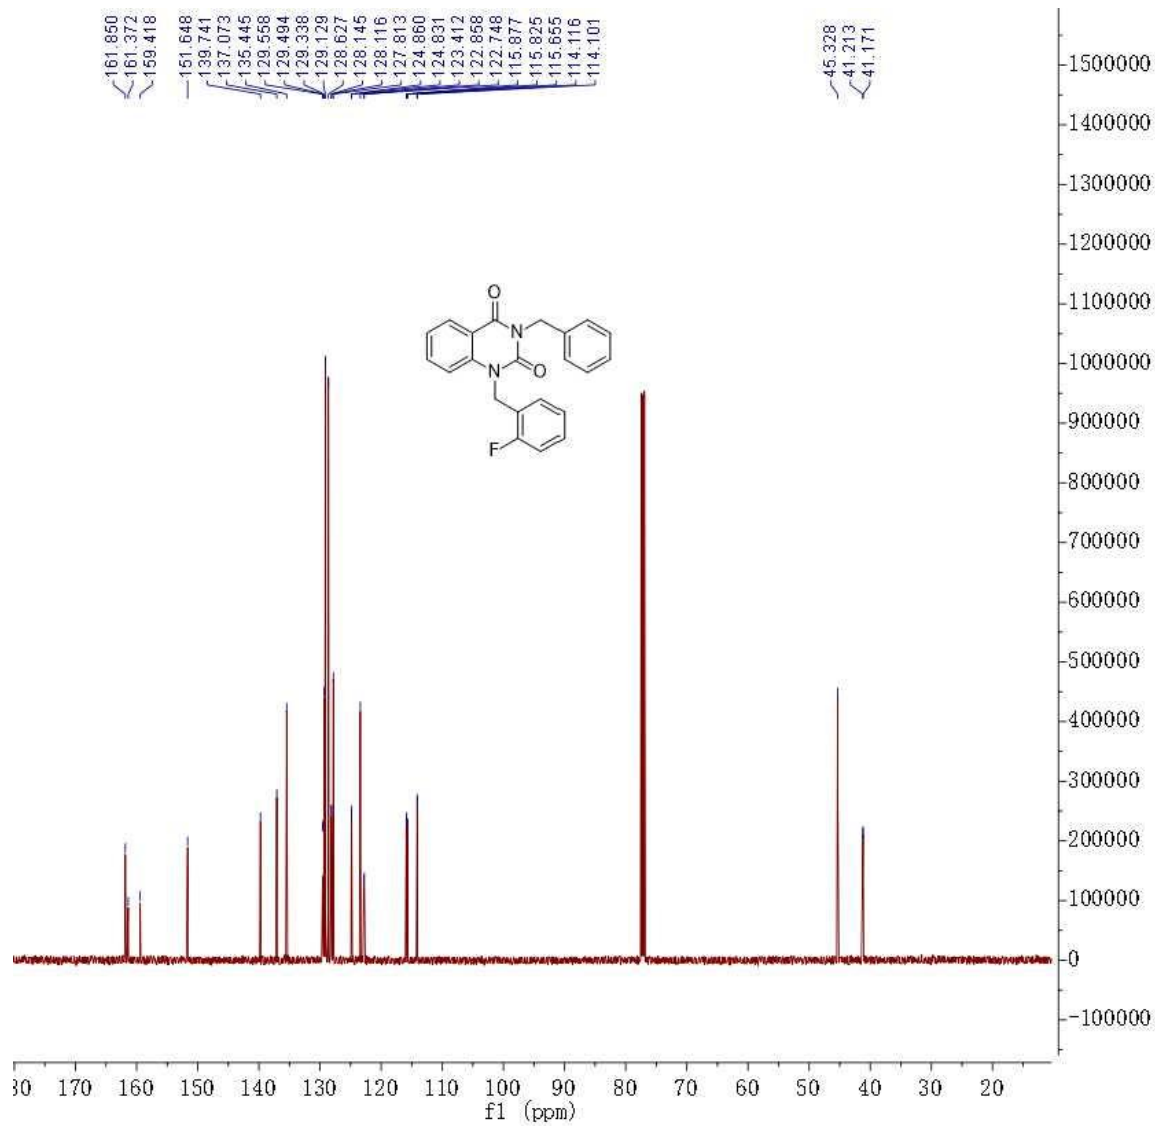

| Parameter                | Value      |
|--------------------------|------------|
| 1 Instrument             | Avance NEO |
| 2 Solvent                | CDCl3      |
| 3 Temperature            | 294.7      |
| 4 Pulse Sequence         | zgpg30     |
| 5 Number of Scans        | 200        |
| 6 Receiver Gain          | 101.0      |
| 7 Relaxation Delay       | 2.0000     |
| 8 Pulse Width            | 10.0000    |
| 9 Spectrometer Frequency | 125.78     |
| 10 Spectral Width        | 30120.5    |
| 11 Lowest Frequency      | -2469.9    |
| 12 Nucleus               | 13C        |
| 13 Acquired Size         | 32768      |
| 14 Spectral Size         | 65536      |

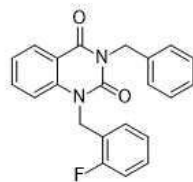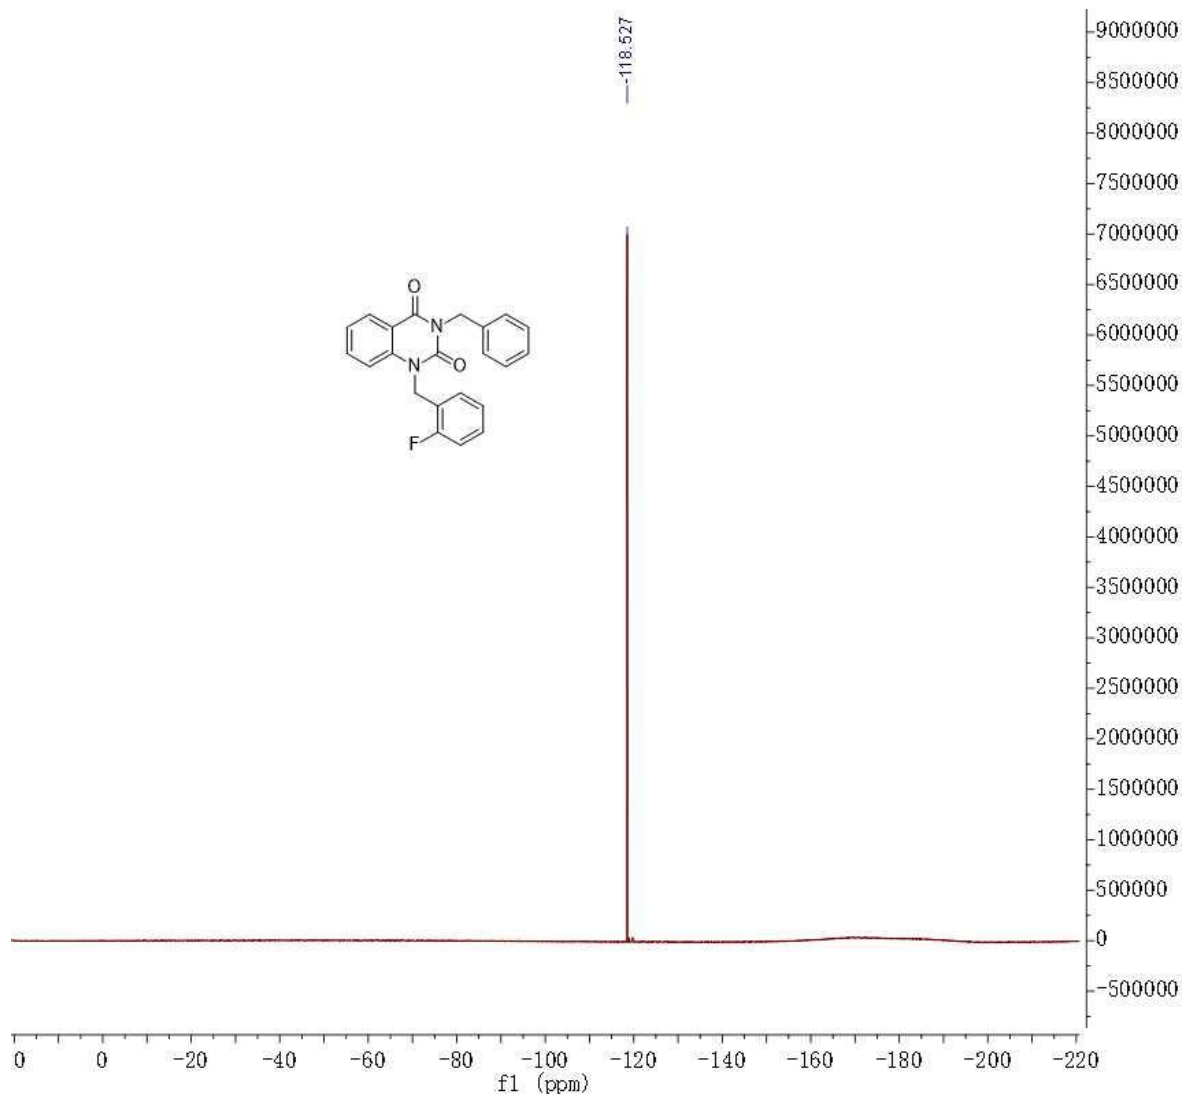

| Parameter          | Value      |
|--------------------|------------|
| 1 Instrument       | Avance NEO |
| 2 Solvent          | CDCl3      |
| 3 Temperature      | 294.0      |
| 4 Pulse Sequence   | zg         |
| 5 Number of Scans  | 16         |
| 6 Receiver Gain    | 101.0      |
| 7 Relaxation Delay | 1.0000     |
| 8 Pulse Width      | 15.0000    |
| 9 Spectrometer     | 470.56     |
| Frequency          |            |
| 10 Spectral Width  | 113636.4   |
| 11 Lowest          | -103879.3  |
| Frequency          |            |
| 12 Nucleus         | 19F        |
| 13 Acquired Size   | 65536      |
| 14 Spectral Size   | 131072     |



**3-benzyl-1-(2-chlorobenzyl)quinazoline-2,4(1H,3H)-dione (3i)**

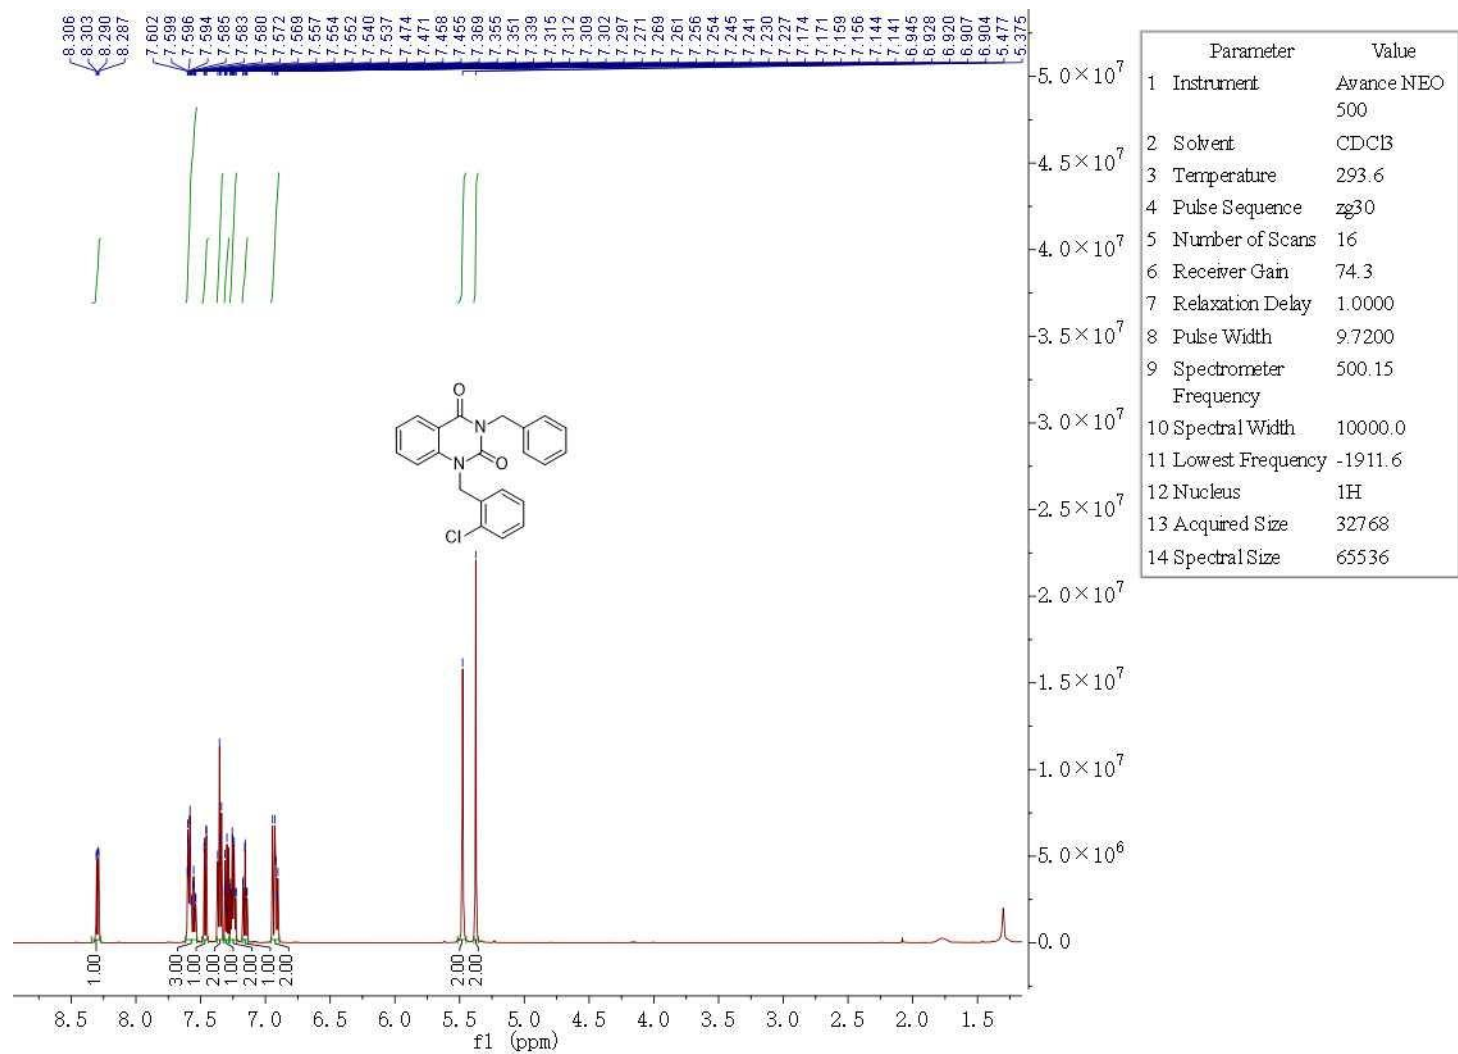

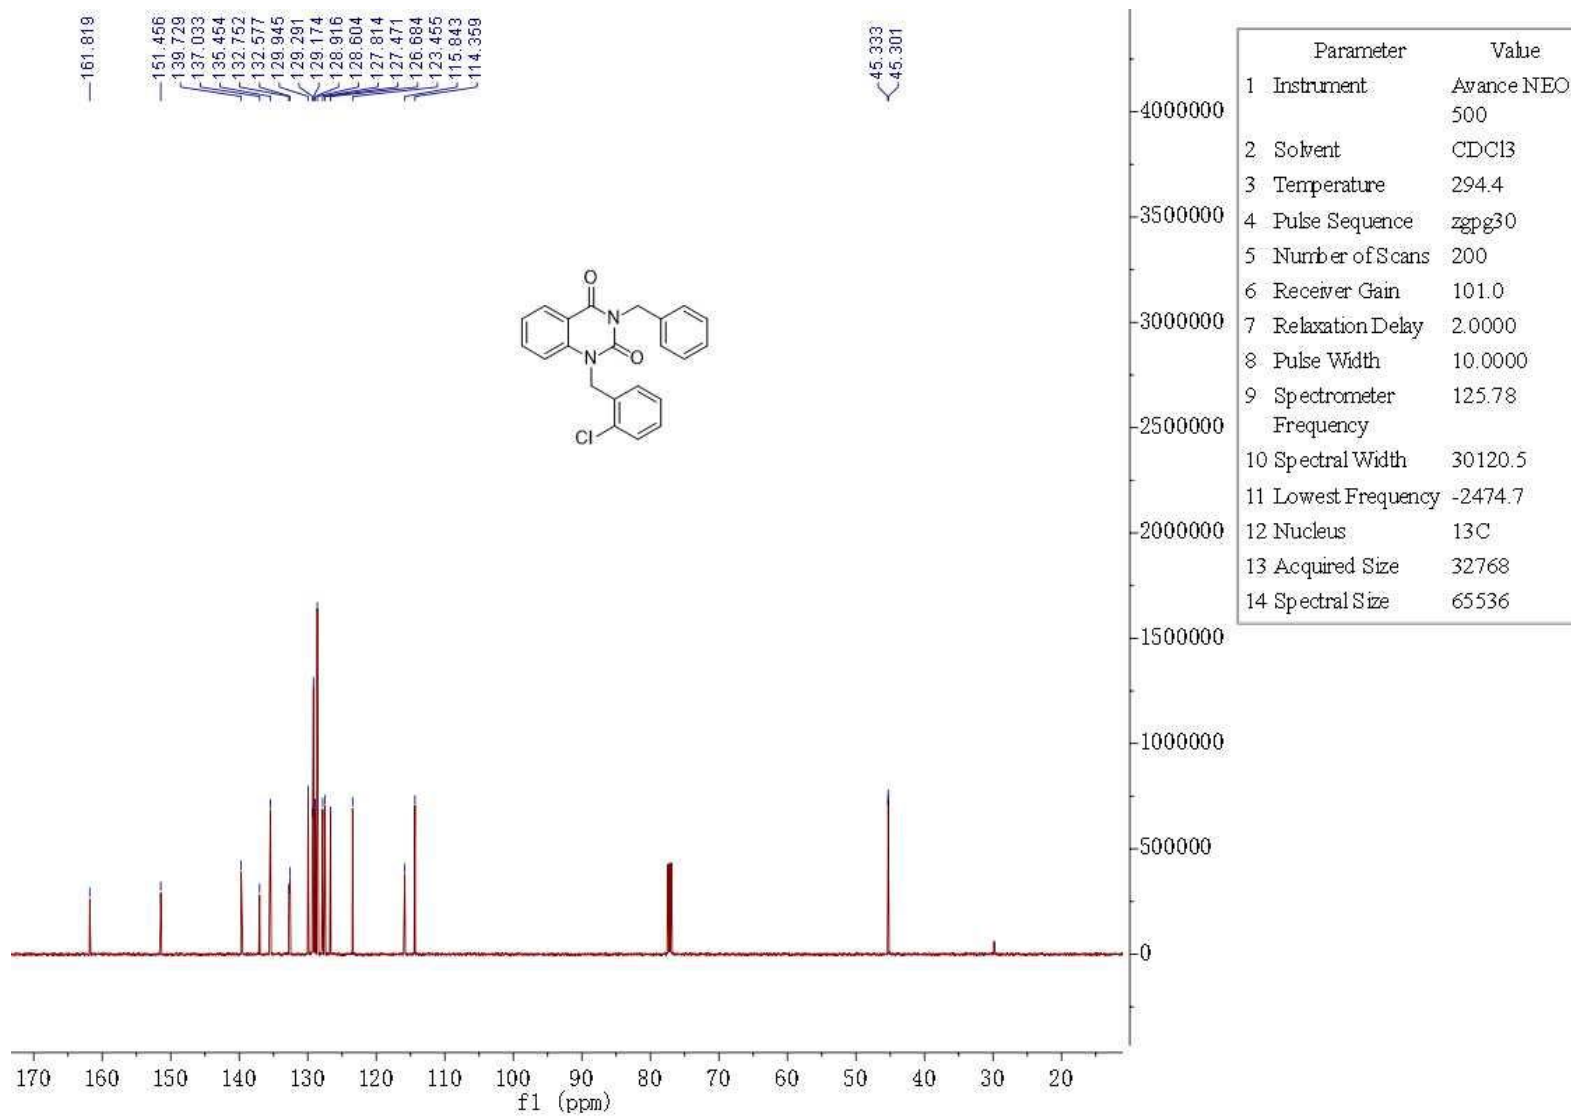

**3-benzyl-1-(2-bromobenzyl)quinazoline-2,4(1H,3H)-dione (3j)**

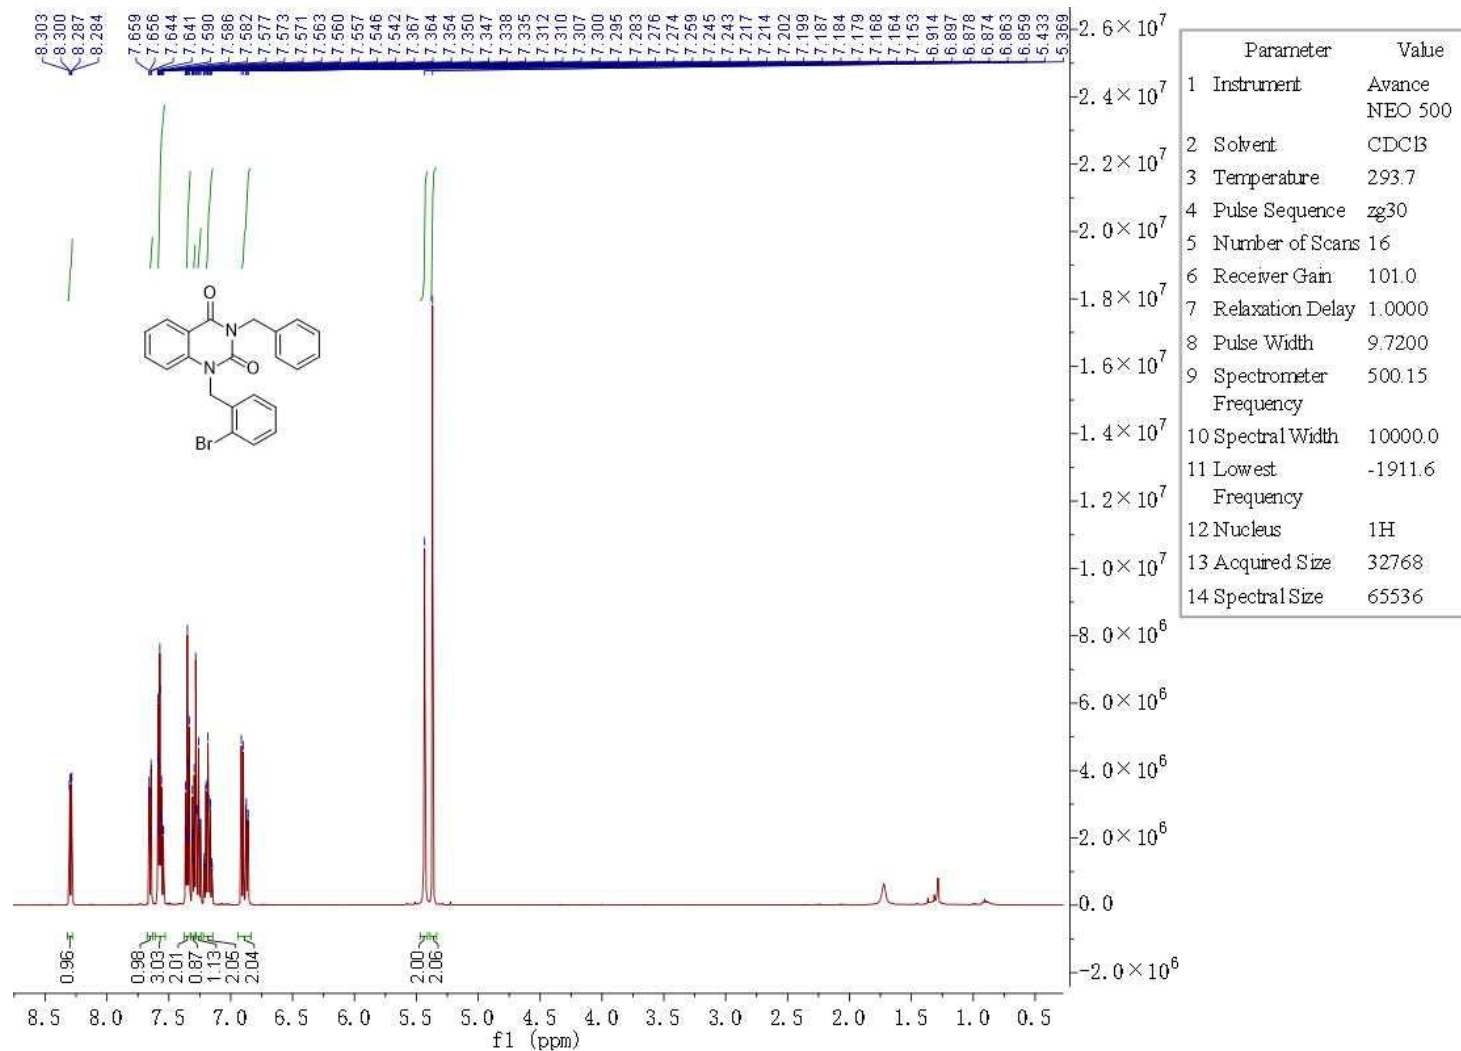

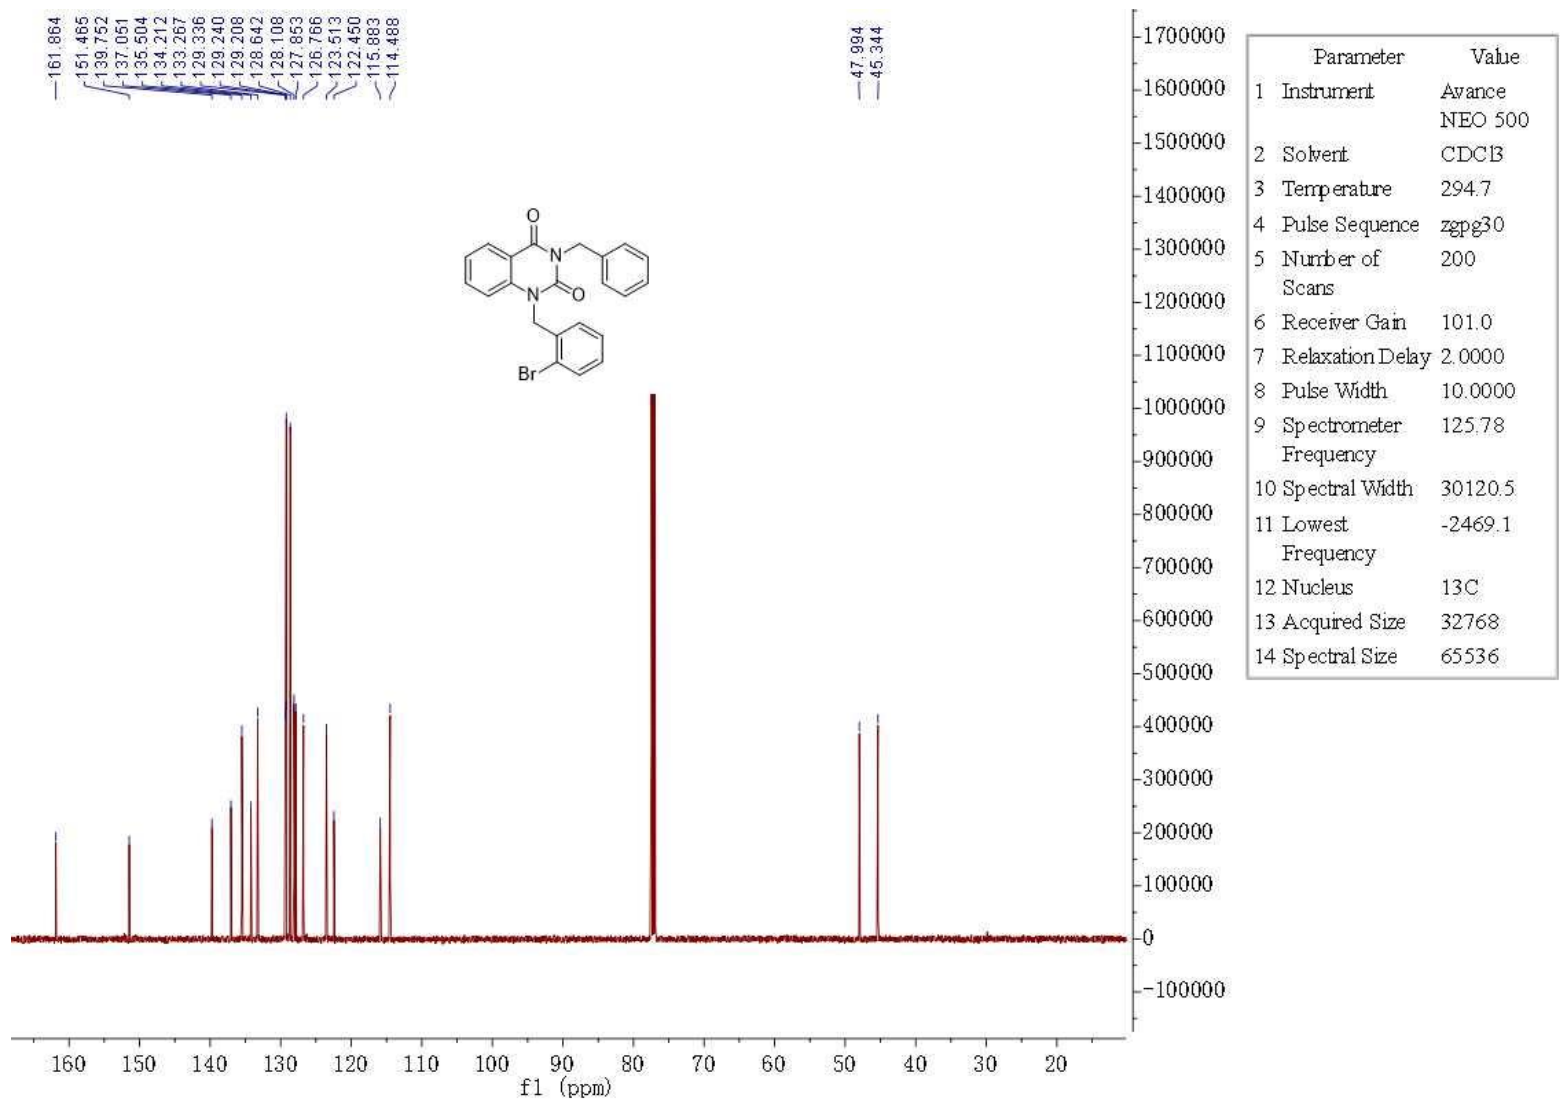

**3-benzyl-1-(2-iodobenzyl)quinazoline-2,4(1H,3H)-dione (3k)**

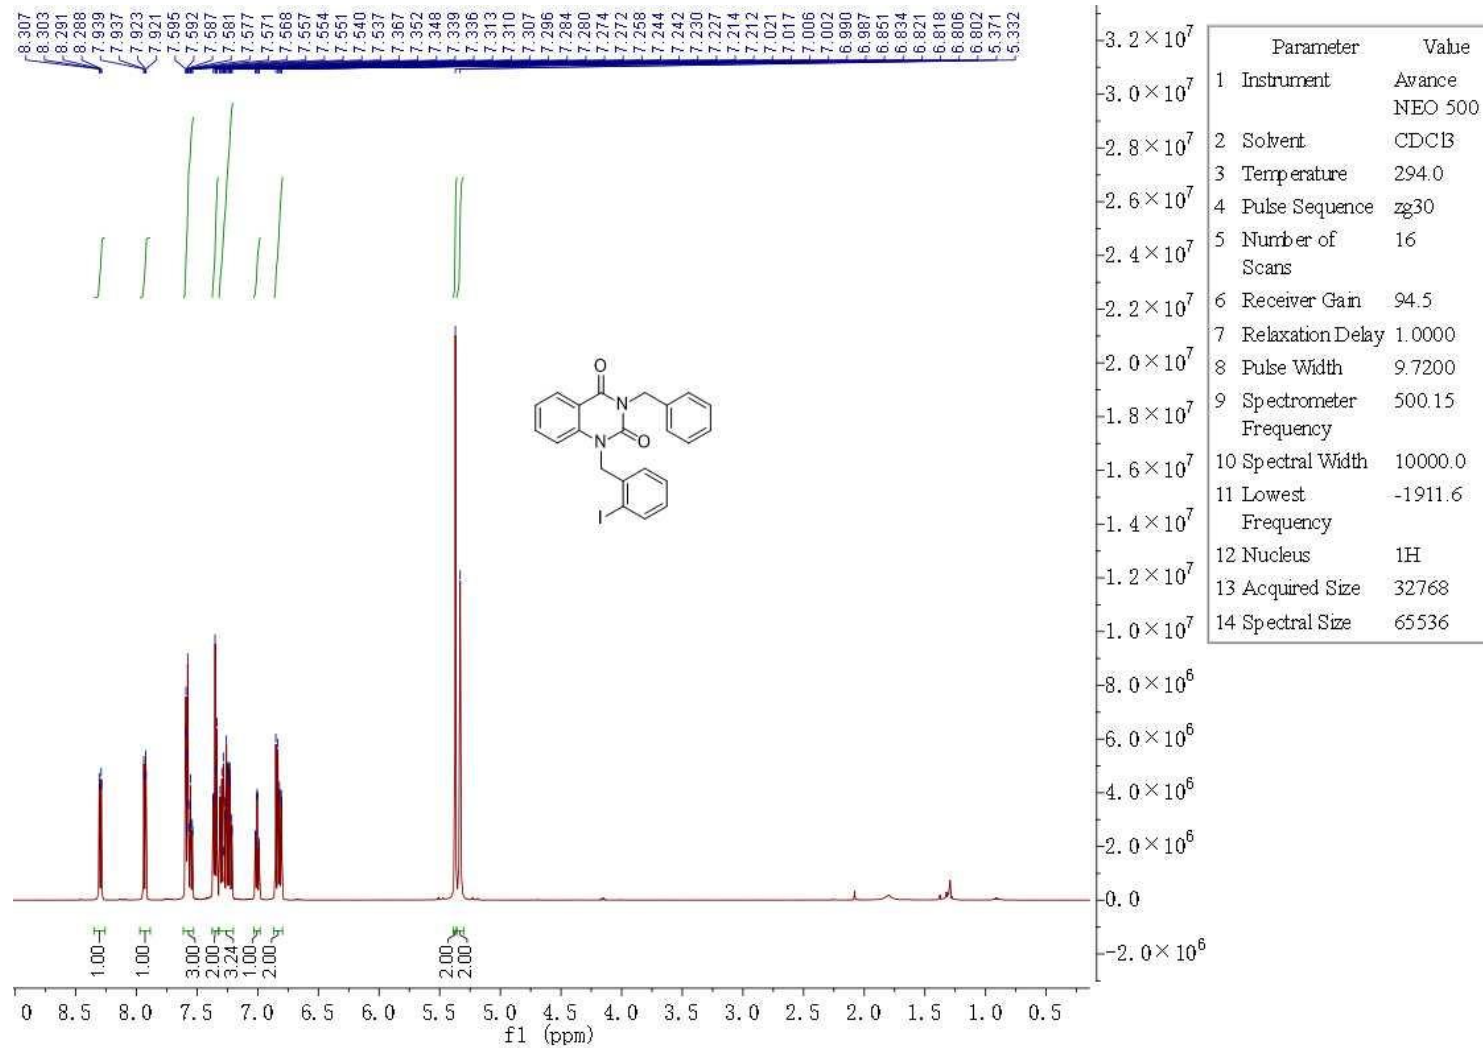

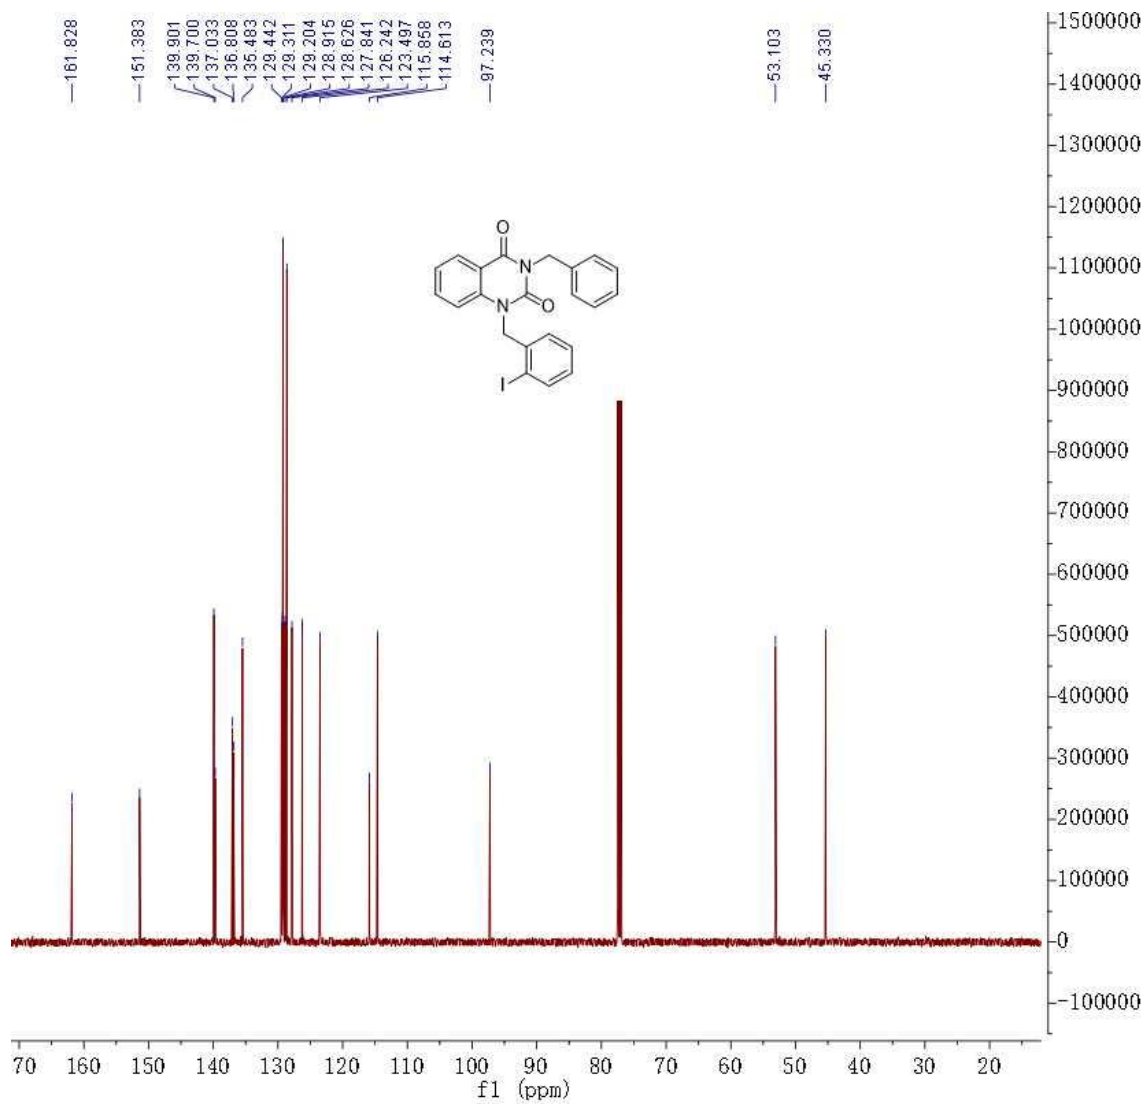

| Parameter                | Value             |
|--------------------------|-------------------|
| 1 Instrument             | Avance<br>NEO 500 |
| 2 Solvent                | CDCl3             |
| 3 Temperature            | 294.6             |
| 4 Pulse Sequence         | zgpg30            |
| 5 Number of Scans        | 200               |
| 6 Receiver Gain          | 101.0             |
| 7 Relaxation Delay       | 2.0000            |
| 8 Pulse Width            | 10.0000           |
| 9 Spectrometer Frequency | 125.78            |
| 10 Spectral Width        | 30120.5           |
| 11 Lowest Frequency      | -2472.3           |
| 12 Nucleus               | 13C               |
| 13 Acquired Size         | 32768             |
| 14 Spectral Size         | 65536             |

**methyl 2-((3-benzyl-2,4-dioxo-3,4-dihydroquinazolin-1(2H)-yl)methyl)benzoate (3l)**

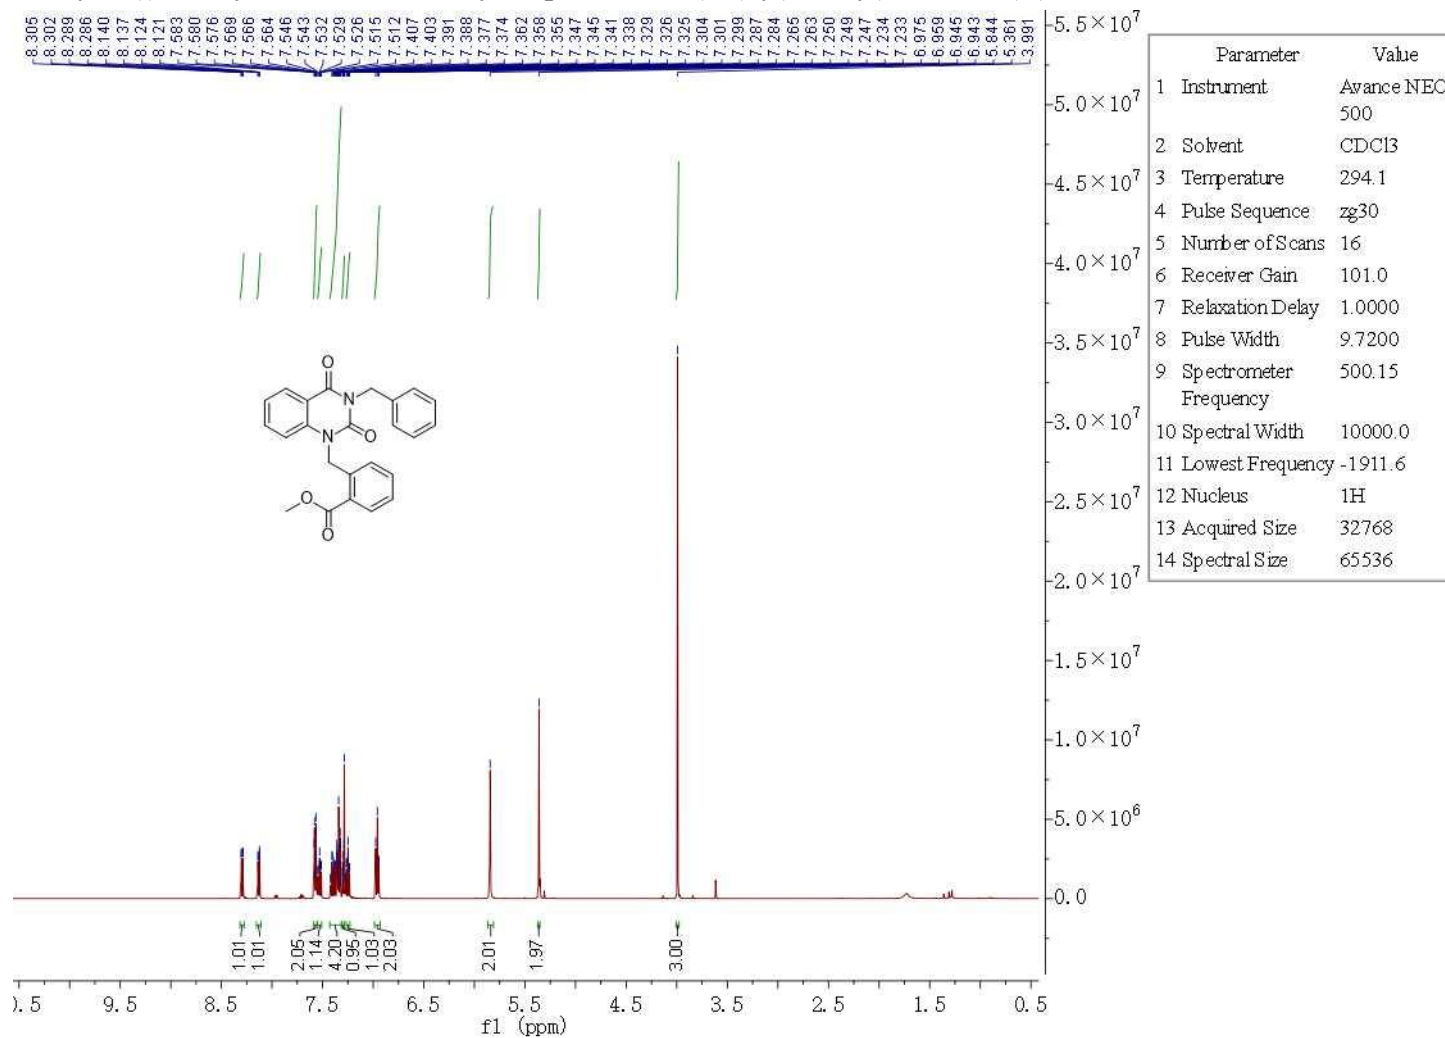



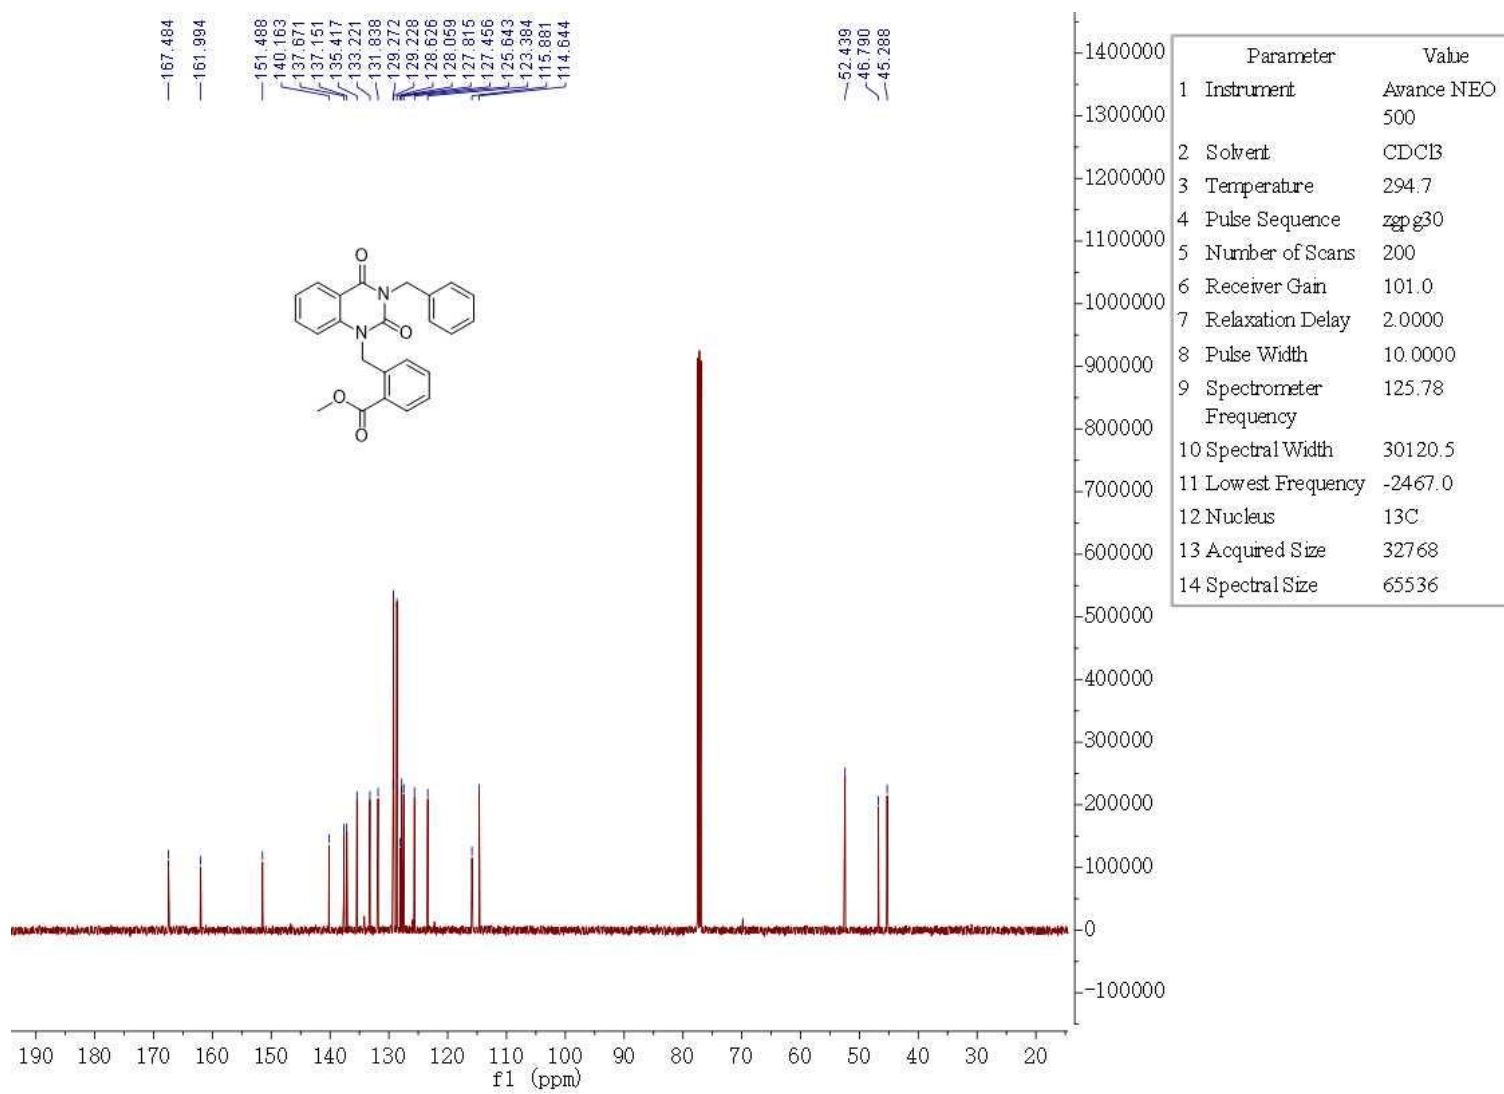



**3-benzyl-1-(3,5-dimethoxybenzyl)quinazoline-2,4(1H,3H)-dione (3m)**

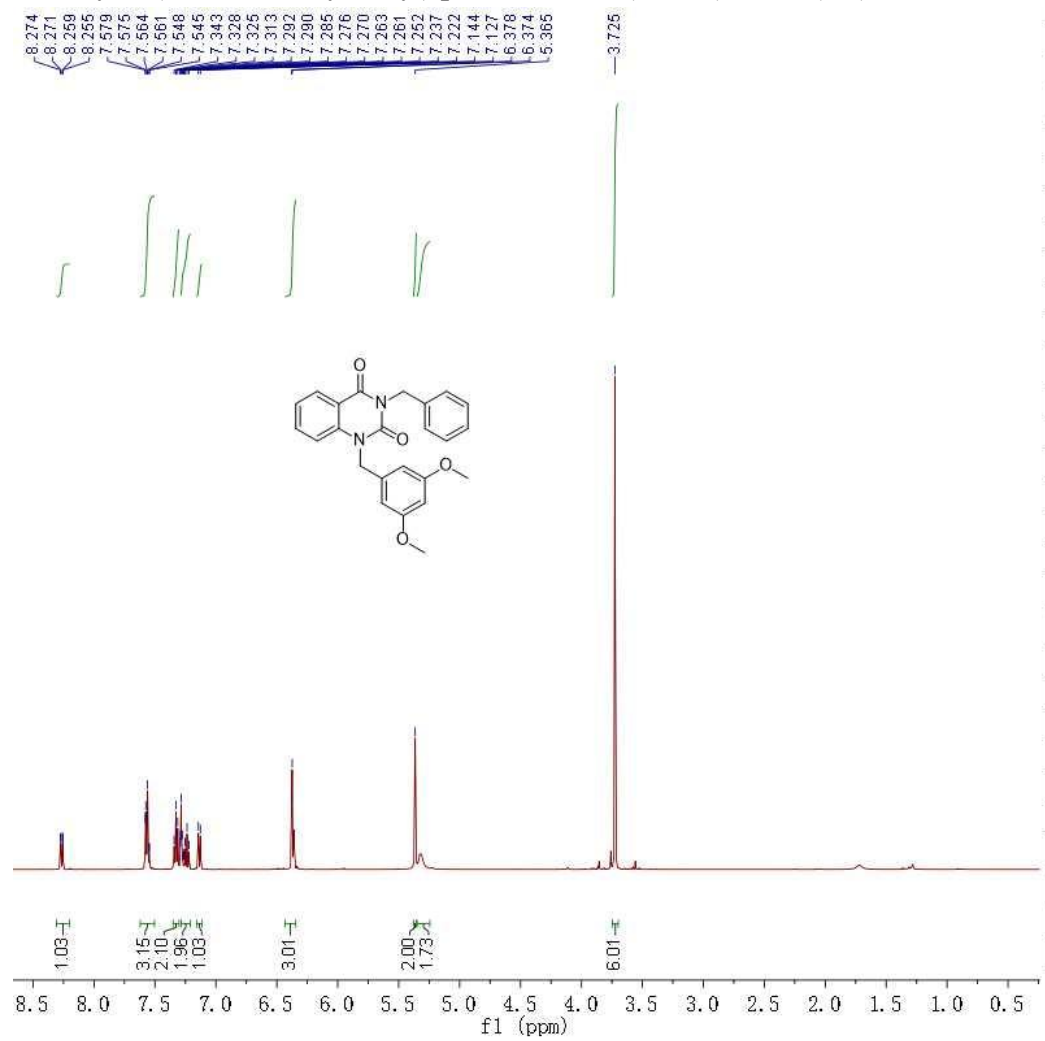

| Parameter           | Value      |
|---------------------|------------|
| 1 Instrument        | Avance NEO |
| 2 Solvent           | CDCl3      |
| 3 Temperature       | 293.6      |
| 4 Pulse Sequence    | zg30       |
| 5 Number of Scans   | 16         |
| 6 Receiver Gain     | 101.0      |
| 7 Relaxation Delay  | 1.0000     |
| 8 Pulse Width       | 9.7200     |
| 9 Spectrometer      | 500.15     |
| Frequency           |            |
| 10 Spectral Width   | 10000.0    |
| 11 Lowest Frequency | -1911.6    |
| 12 Nucleus          | 1H         |
| 13 Acquired Size    | 32768      |
| 14 Spectral Size    | 65536      |

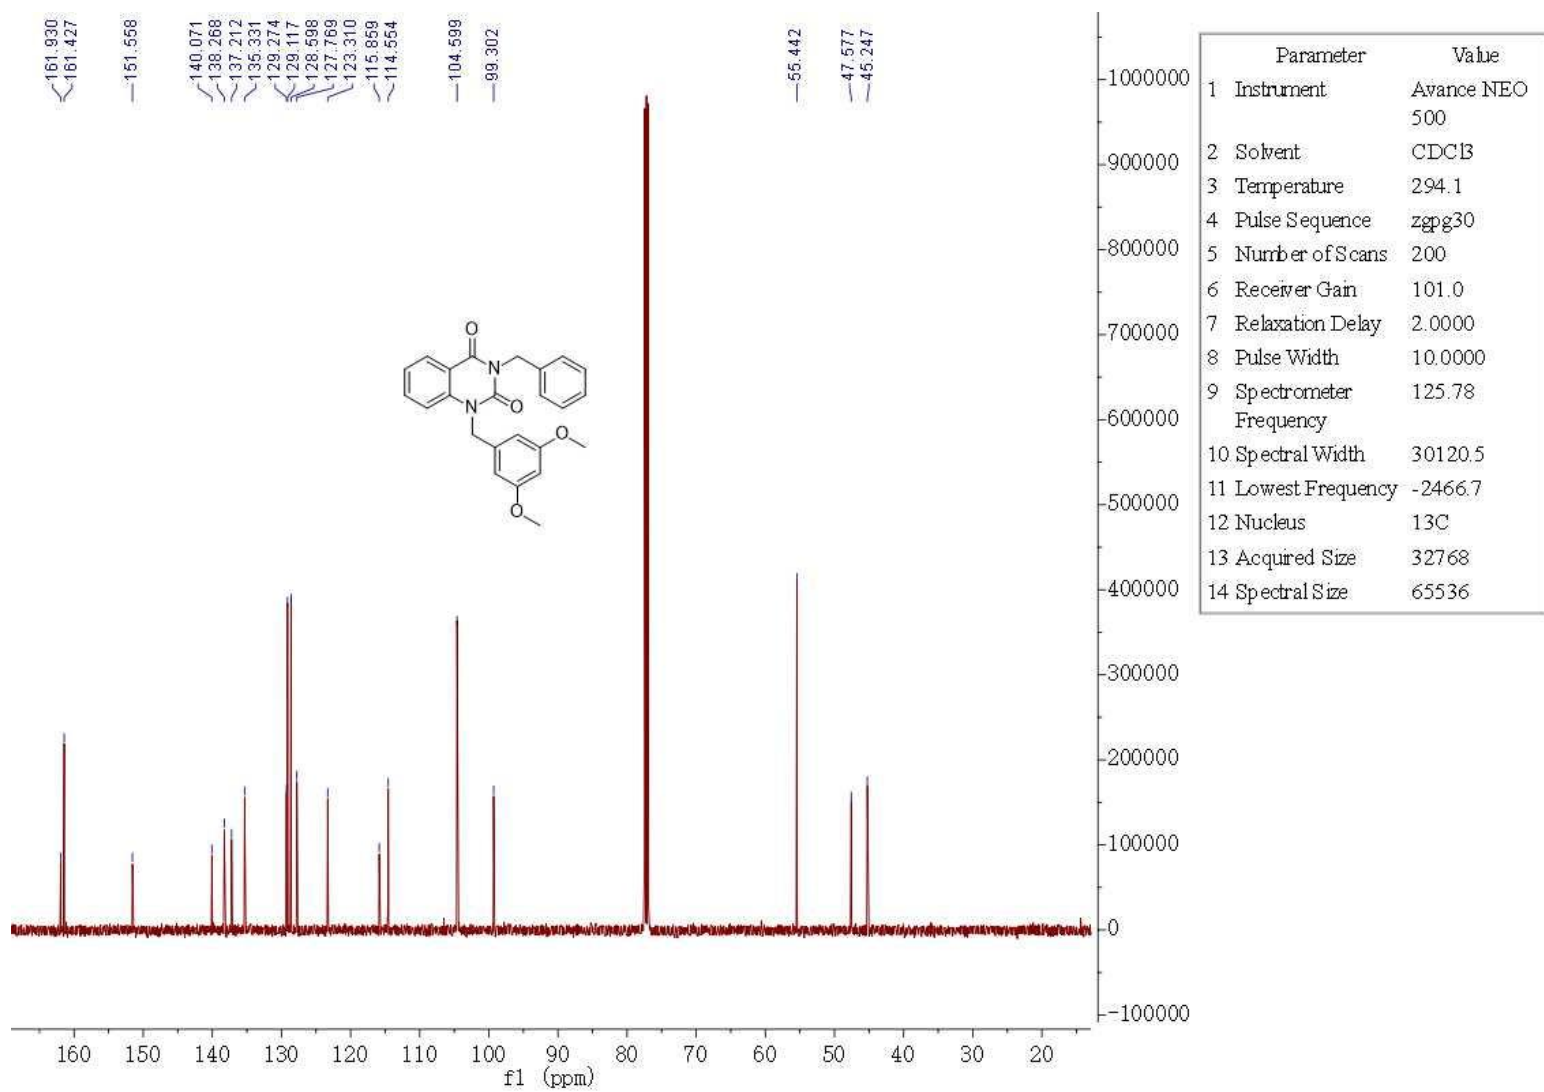

**3-benzyl-1-(3,5-bis(trifluoromethyl)benzyl)quinazoline-2,4(1H,3H)-dione (3n)**

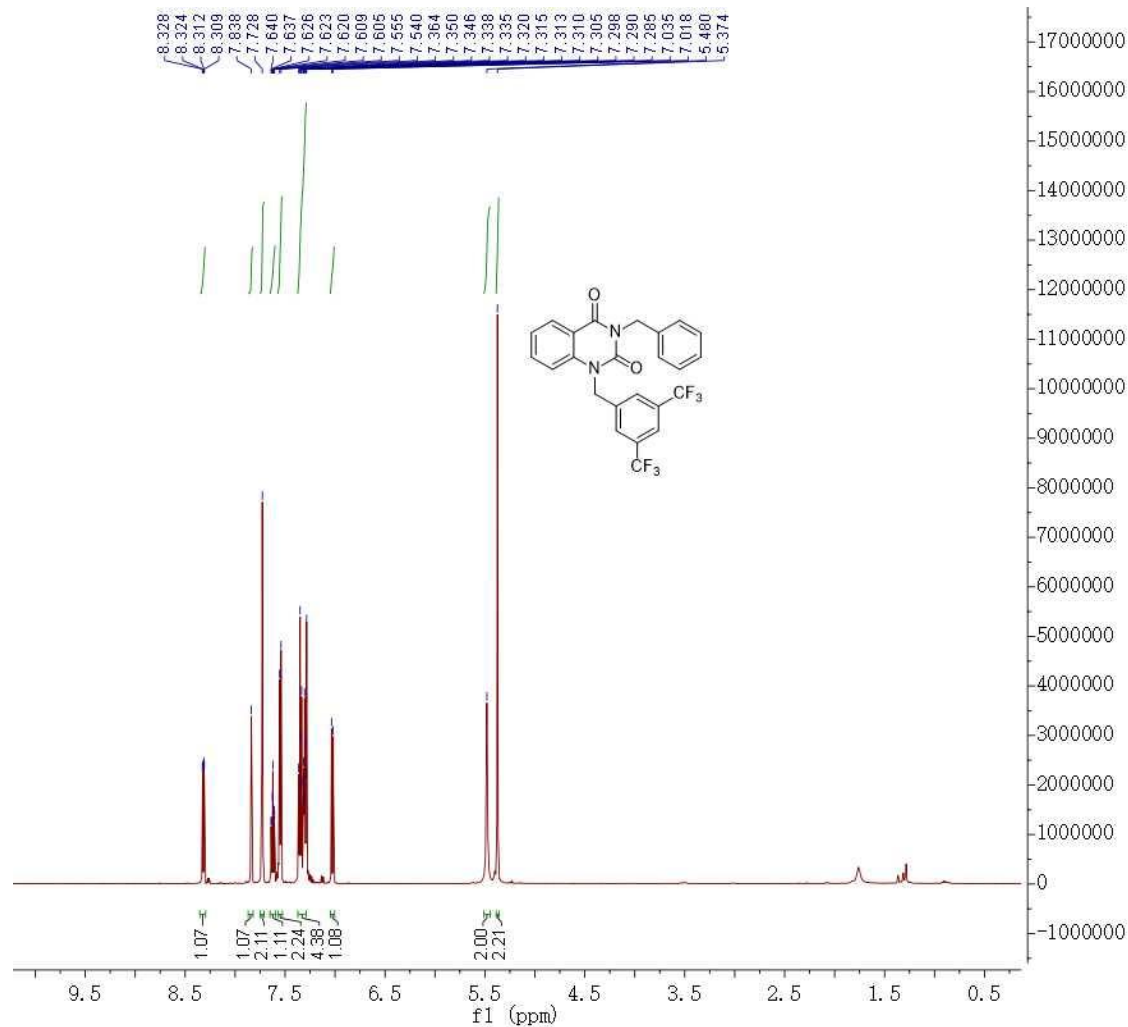

| Parameter           | Value      |
|---------------------|------------|
| 1 Instrument        | Avance NEO |
| 2 Solvent           | CDCl3      |
| 3 Temperature       | 293.6      |
| 4 Pulse Sequence    | zg30       |
| 5 Number of Scans   | 16         |
| 6 Receiver Gain     | 101.0      |
| 7 Relaxation Delay  | 1.0000     |
| 8 Pulse Width       | 9.7200     |
| 9 Spectrometer      | 500.15     |
| Frequency           |            |
| 10 Spectral Width   | 10000.0    |
| 11 Lowest Frequency | -1911.6    |
| 12 Nucleus          | 1H         |
| 13 Acquired Size    | 32768      |
| 14 Spectral Size    | 65536      |

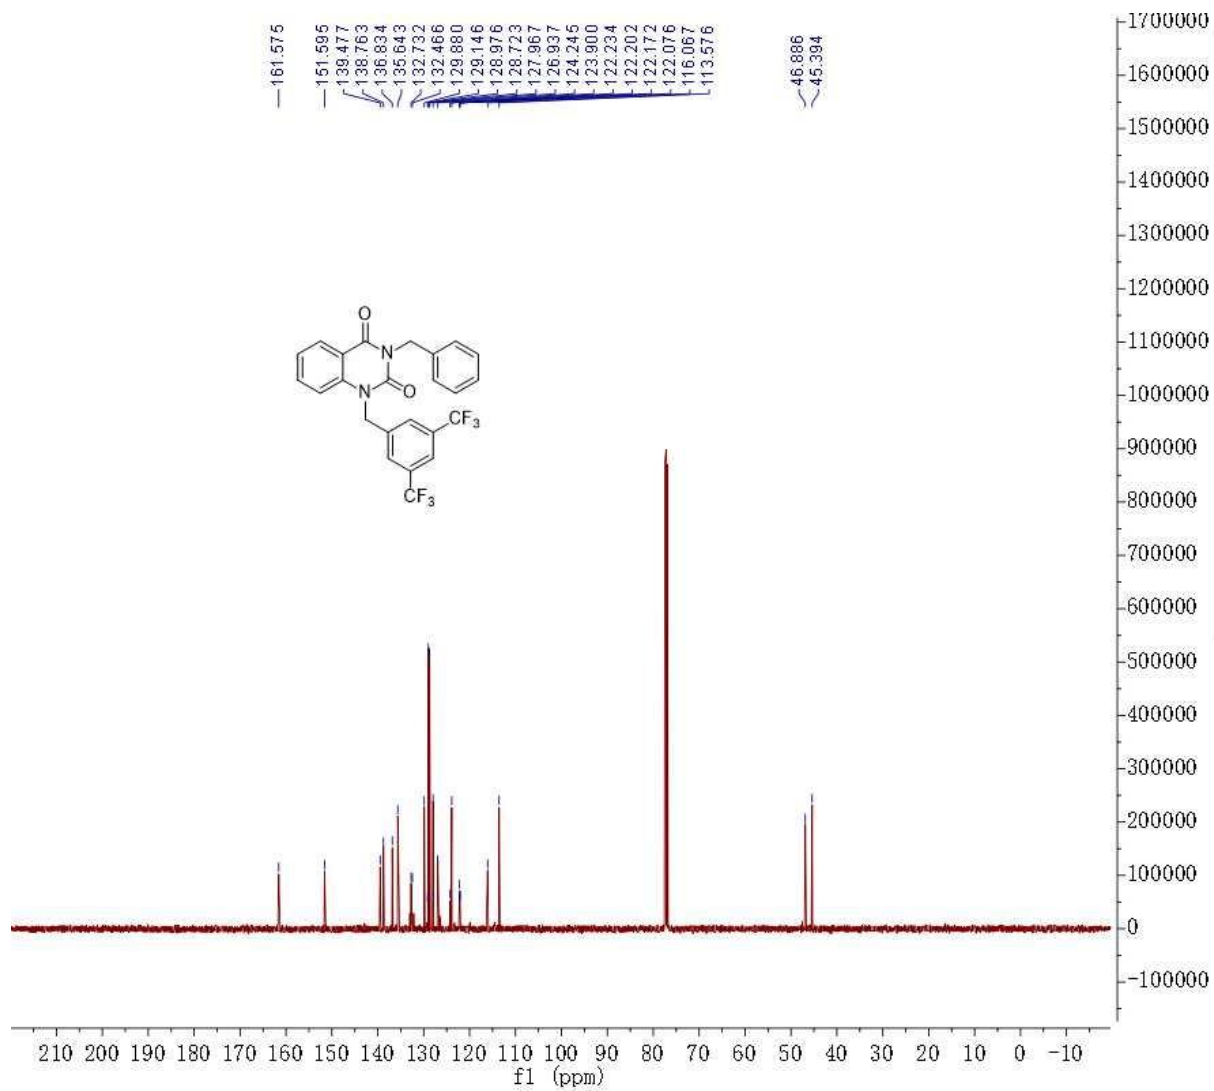

| Parameter          | Value           |
|--------------------|-----------------|
| 1 Instrument       | Avance NEO      |
| 2 Solvent          | CDCB            |
| 3 Temperature      | 294.7           |
| 4 Pulse Sequence   | zgpg30          |
| 5 Number of Scans  | 200             |
| 6 Receiver Gain    | 101.0           |
| 7 Relaxation Delay | 2.0000          |
| 8 Pulse Width      | 10.0000         |
| 9 Spectrometer     | 125.78          |
| Frequency          |                 |
| 10 Spectral Width  | 30120.5         |
| 11 Lowest          | -2465.6         |
| Frequency          |                 |
| 12 Nucleus         | <sup>13</sup> C |
| 13 Acquired Size   | 32768           |
| 14 Spectral Size   | 65536           |

**1-allyl-3-benzylquinazoline-2,4(1H,3H)-dione (3o)**

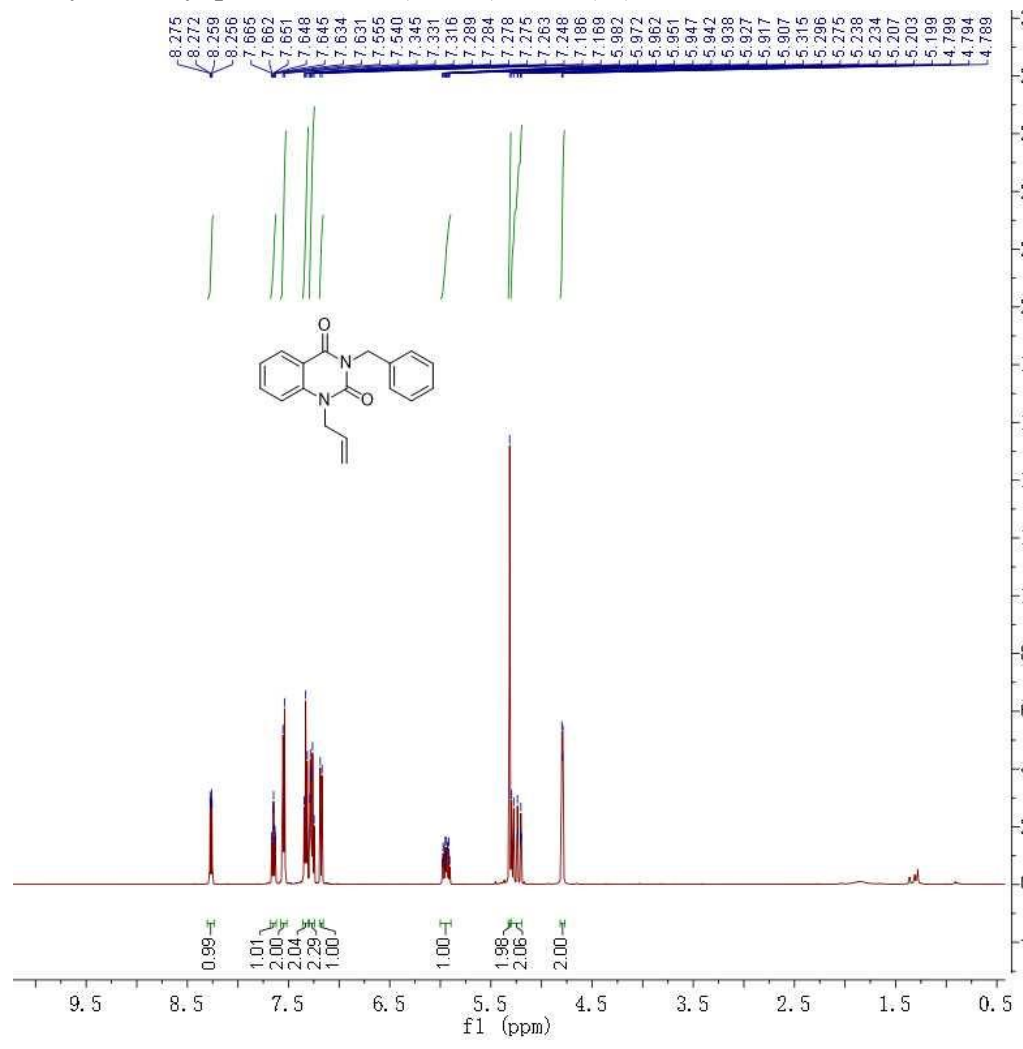

| Parameter                | Value      |
|--------------------------|------------|
| 1 Instrument             | Avance NEO |
| 2 Solvent                | CDCl3      |
| 3 Temperature            | 293.5      |
| 4 Pulse Sequence         | zg30       |
| 5 Number of Scans        | 16         |
| 6 Receiver Gain          | 101.0      |
| 7 Relaxation Delay       | 1.0000     |
| 8 Pulse Width            | 9.7200     |
| 9 Spectrometer Frequency | 500.15     |
| 10 Spectral Width        | 10000.0    |
| 11 Lowest Frequency      | -1911.6    |
| 12 Nucleus               | 1H         |
| 13 Acquired Size         | 32768      |
| 14 Spectral Size         | 65536      |

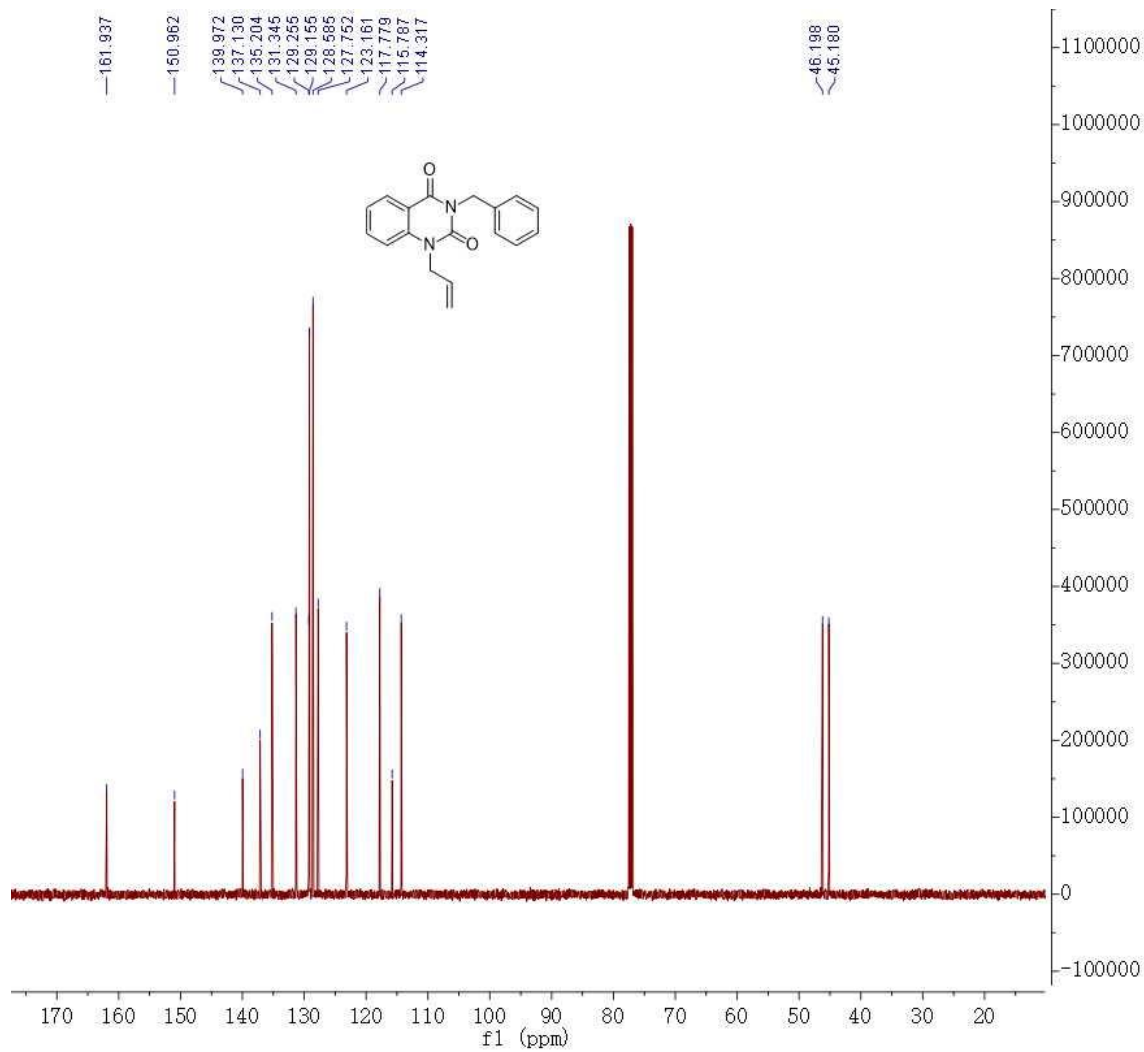

| Parameter           | Value      |
|---------------------|------------|
| 1 Instrument        | Avance NEO |
| 2 Solvent           | CDCl3      |
| 3 Temperature       | 294.2      |
| 4 Pulse Sequence    | zgpg30     |
| 5 Number of Scans   | 200        |
| 6 Receiver Gain     | 101.0      |
| 7 Relaxation Delay  | 2.0000     |
| 8 Pulse Width       | 10.0000    |
| 9 Spectrometer      | 125.78     |
| Frequency           |            |
| 10 Spectral Width   | 30120.5    |
| 11 Lowest Frequency | -2468.4    |
| 12 Nucleus          | 13C        |
| 13 Acquired Size    | 32768      |
| 14 Spectral Size    | 65536      |

ethyl (E)-4-(3-benzyl-2,4-dioxo-3,4-dihydroquinazolin-1(2H)-yl)but-2-enoate (3p)

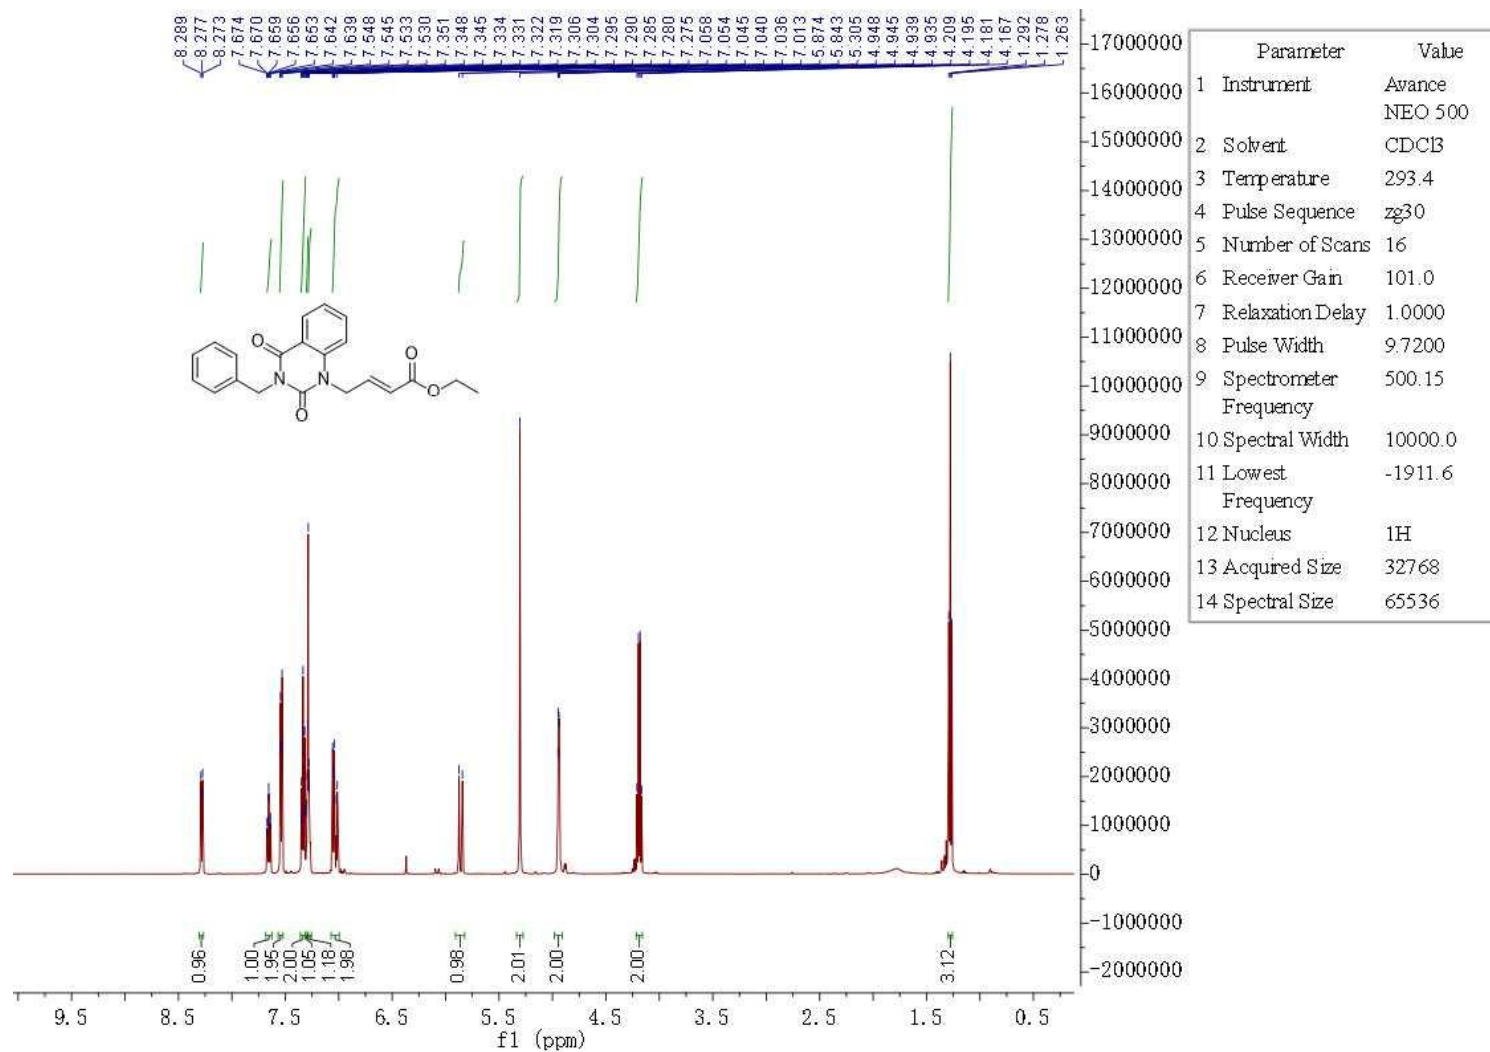



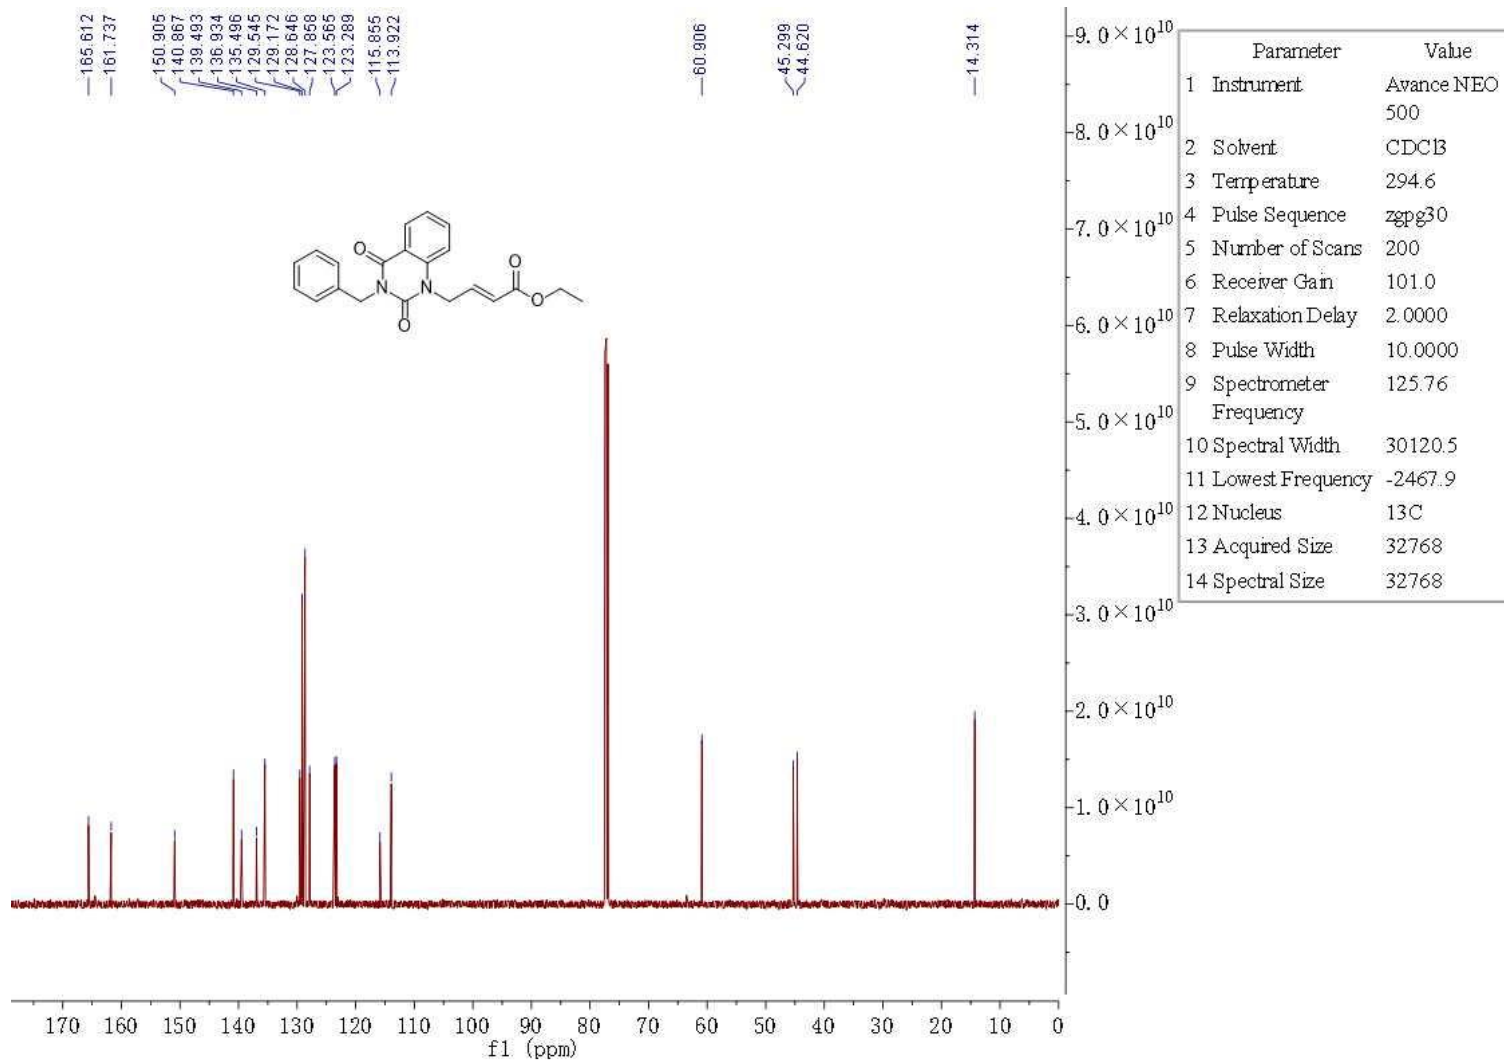



4'-((3-benzyl-2,4-dioxo-3,4-dihydroquinazolin-1(2H)-yl)methyl)-[1,1'-biphenyl]-2-carbonitrile (3q)

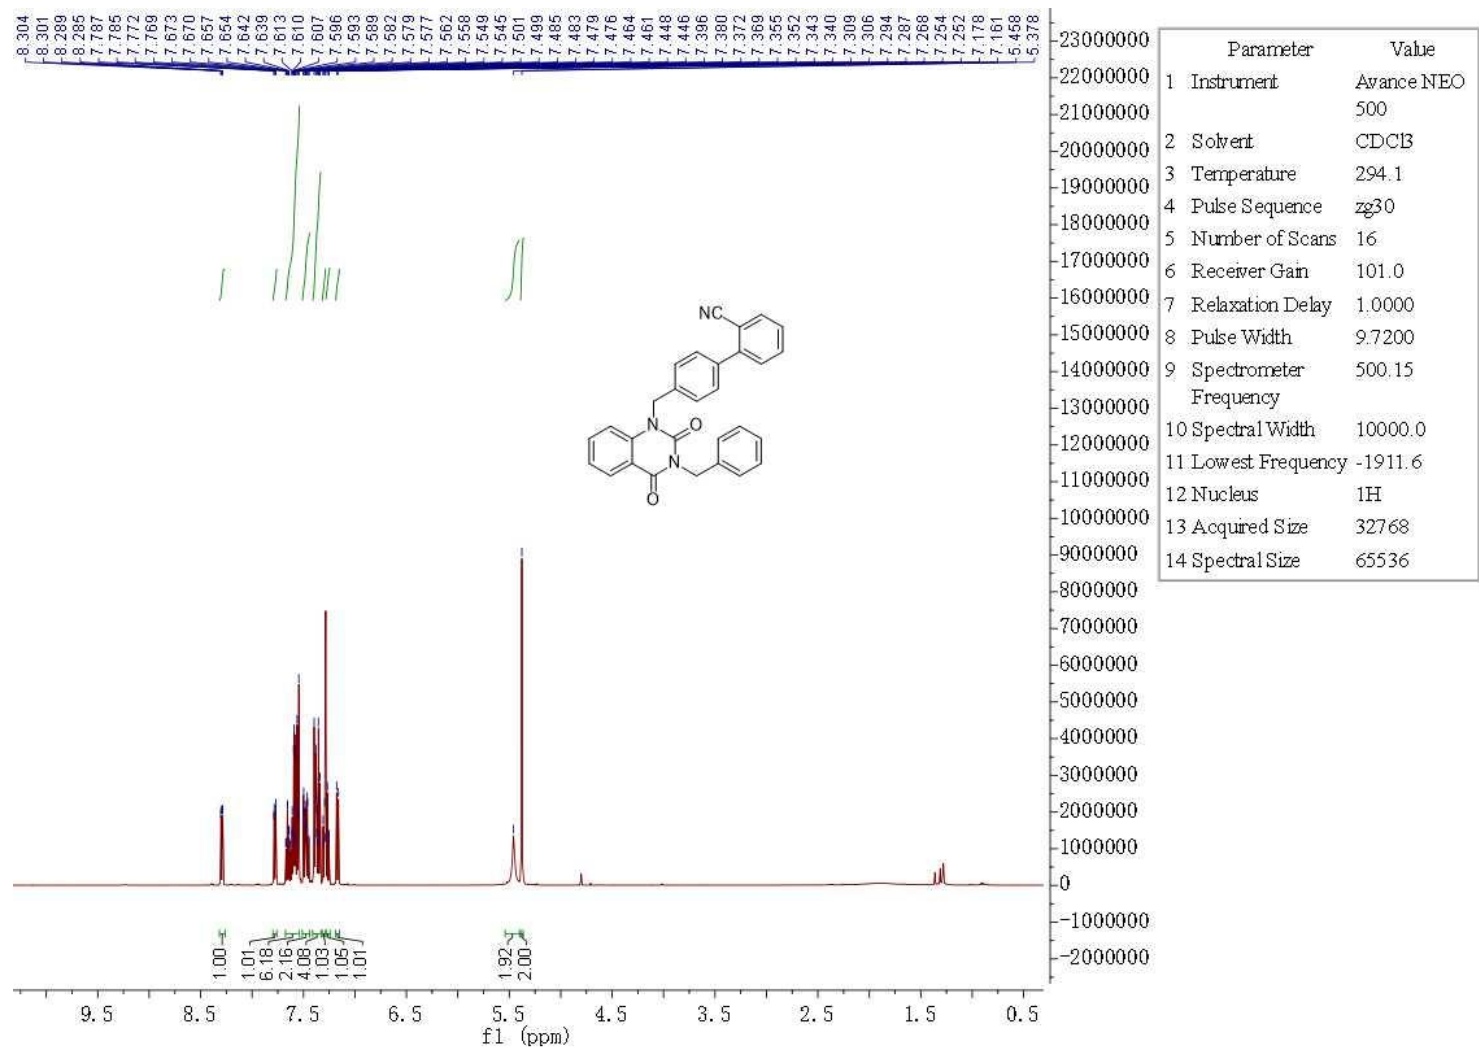

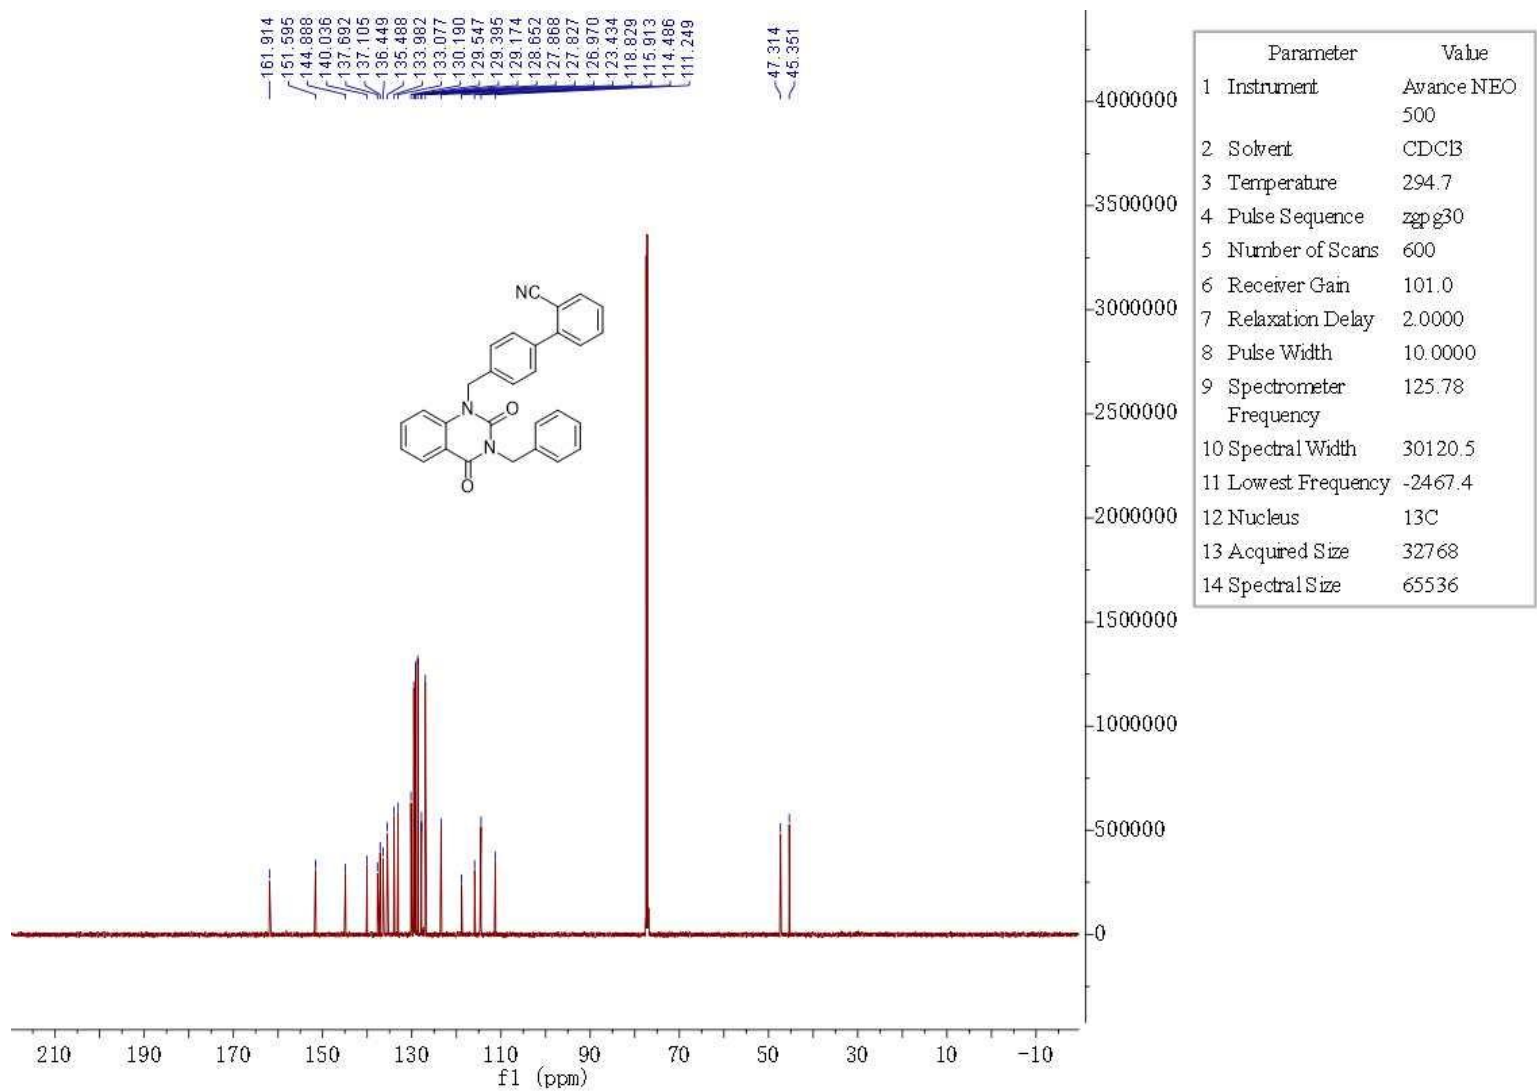

**3-benzyl-1-((5-chlorothiophen-2-yl)methyl)quinazoline-2,4(1H,3H)-dione (3r)**

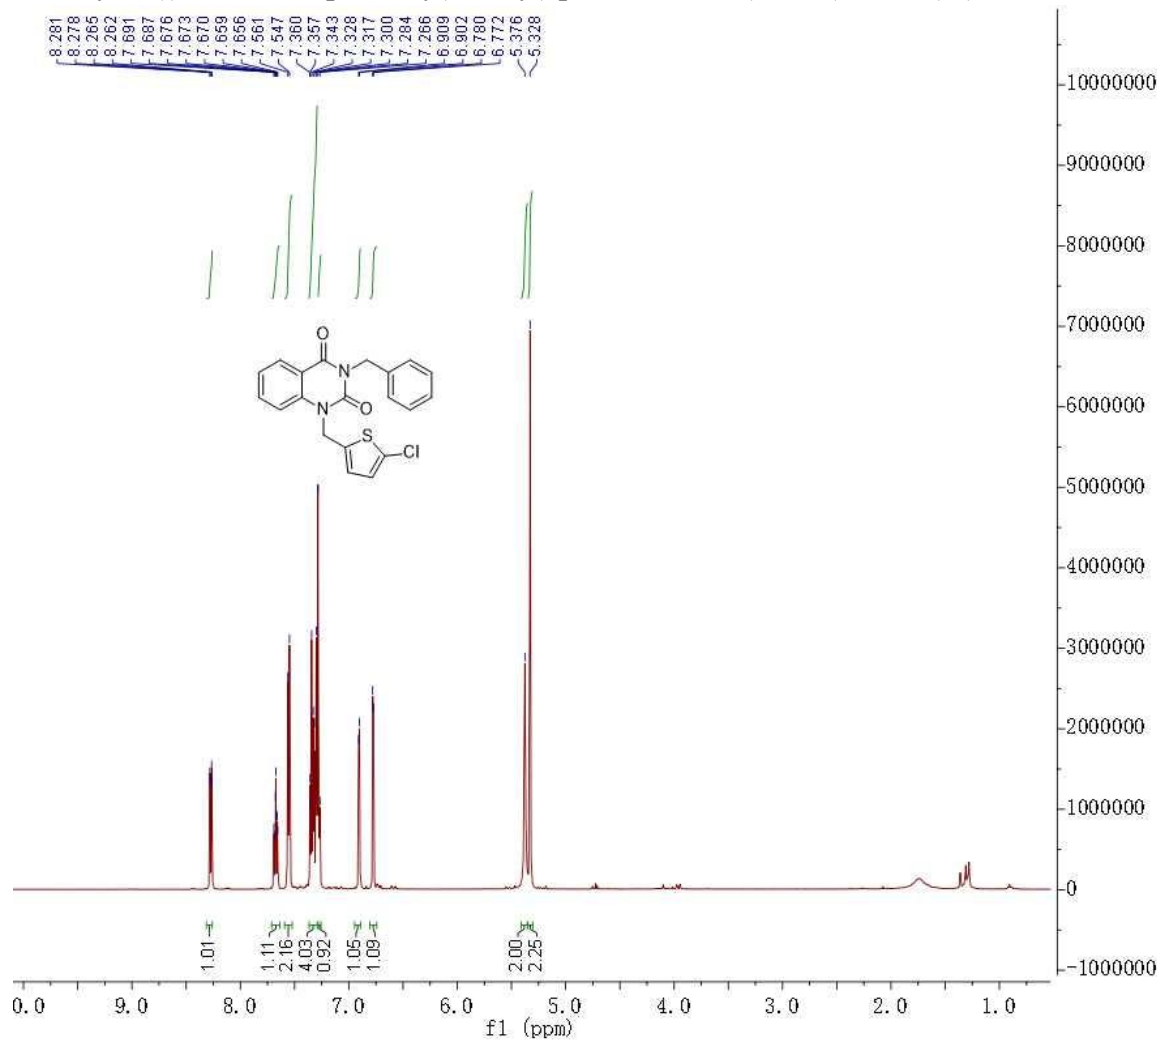

| Parameter                | Value      |
|--------------------------|------------|
| 1 Instrument             | Avance NEO |
| 2 Solvent                | CDCl3      |
| 3 Temperature            | 293.7      |
| 4 Pulse Sequence         | zg30       |
| 5 Number of Scans        | 16         |
| 6 Receiver Gain          | 101.0      |
| 7 Relaxation Delay       | 1.0000     |
| 8 Pulse Width            | 9.7200     |
| 9 Spectrometer Frequency | 500.15     |
| 10 Spectral Width        | 10000.0    |
| 11 Lowest Frequency      | -1911.6    |
| 12 Nucleus               | 1H         |
| 13 Acquired Size         | 32768      |
| 14 Spectral Size         | 65536      |

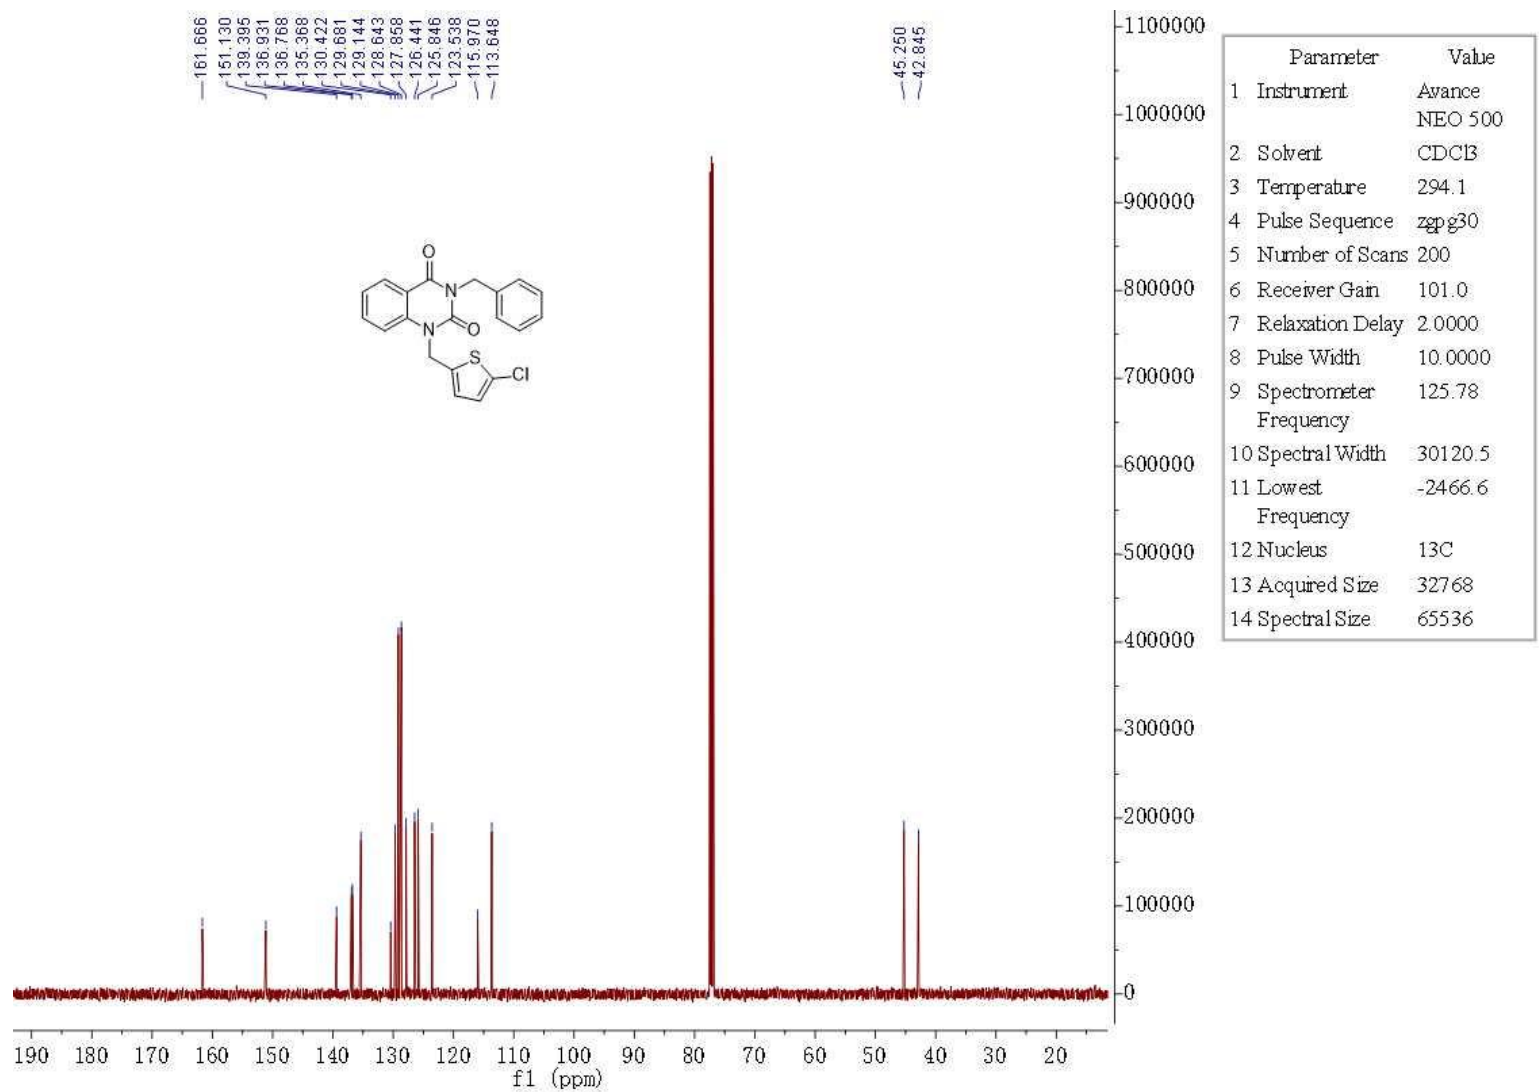

**3-benzyl-1-(3-(trimethylsilyl)prop-2-yn-1-yl)quinazoline-2,4(1H,3H)-dione (3t)**

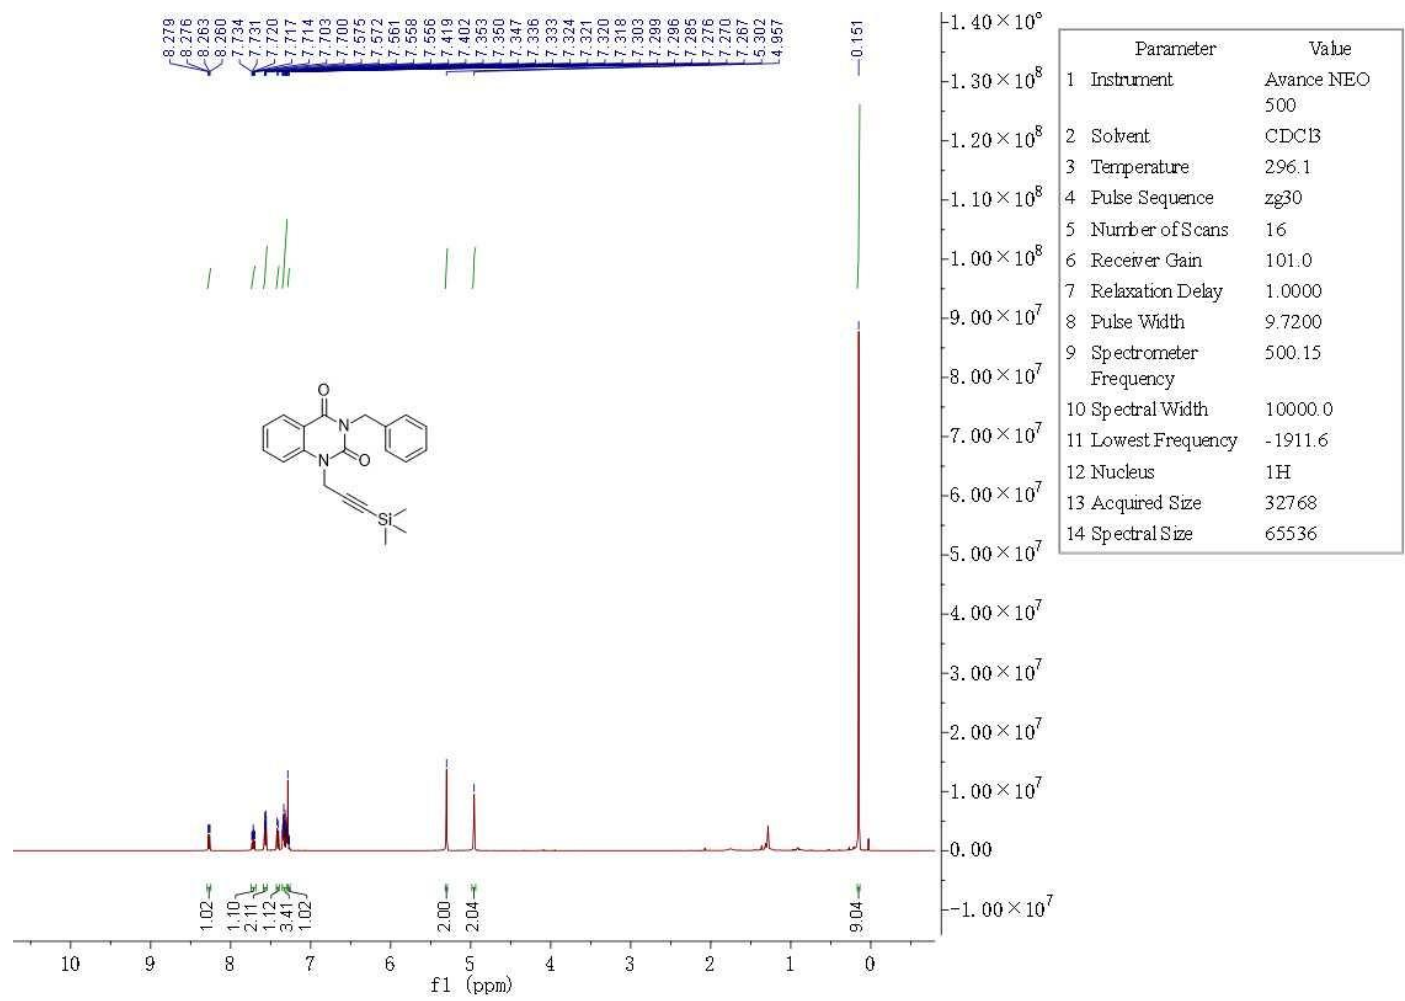

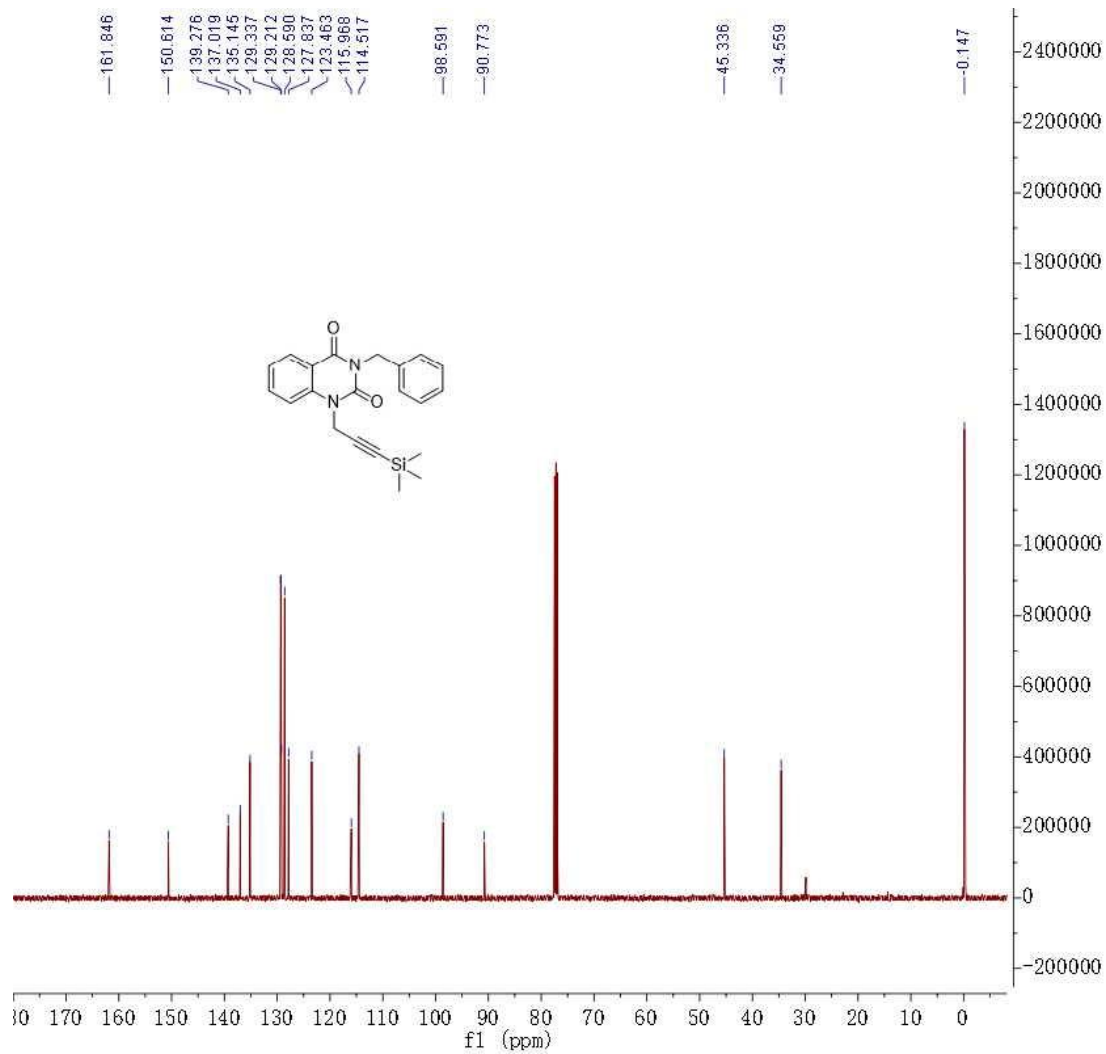

| Parameter                | Value      |
|--------------------------|------------|
| 1 Instrument             | Avance NEO |
| 2 Solvent                | CDCl3      |
| 3 Temperature            | 296.1      |
| 4 Pulse Sequence         | zgpg30     |
| 5 Number of Scans        | 300        |
| 6 Receiver Gain          | 101.0      |
| 7 Relaxation Delay       | 2.0000     |
| 8 Pulse Width            | 10.0000    |
| 9 Spectrometer Frequency | 125.78     |
| 10 Spectral Width        | 30120.5    |
| 11 Lowest Frequency      | -2466.4    |
| 12 Nucleus               | 13C        |
| 13 Acquired Size         | 32768      |
| 14 Spectral Size         | 65536      |

**1-benzyl-3-(4-methylbenzyl)quinazoline-2,4(1H,3H)-dione (5a)**

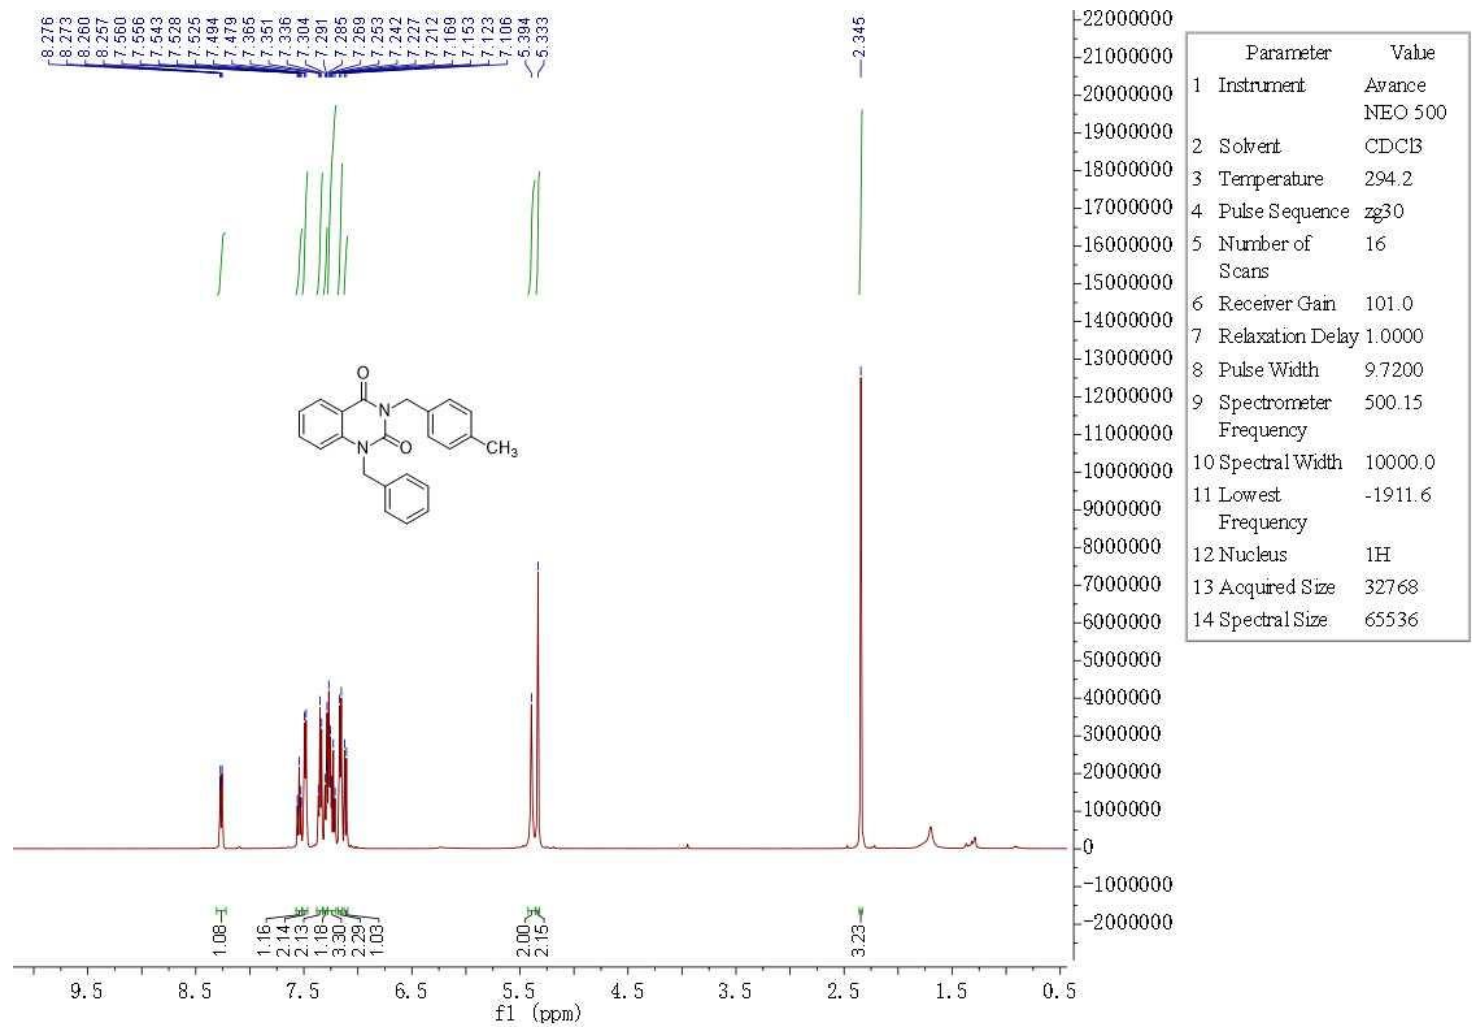

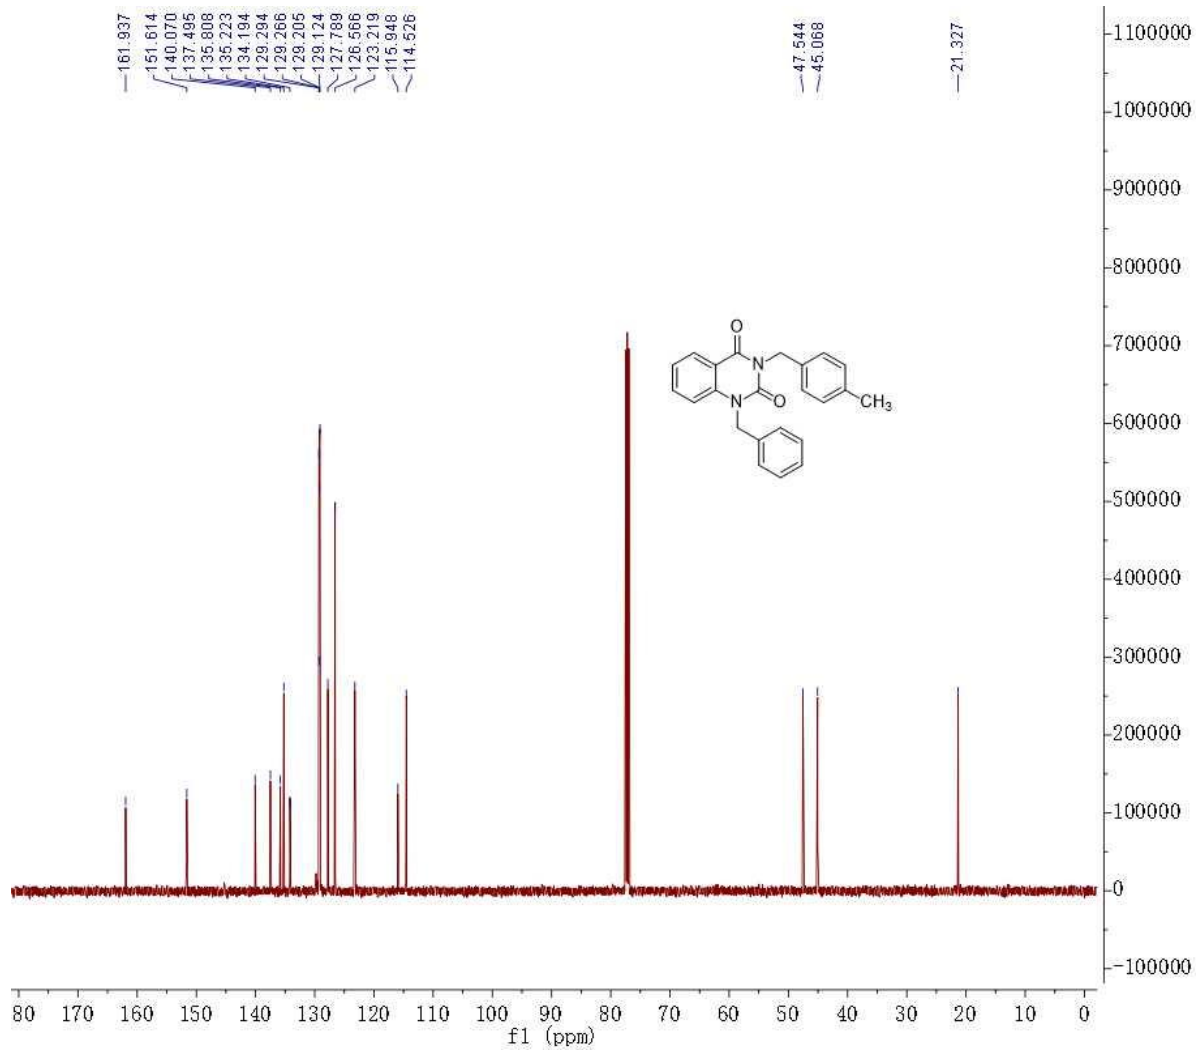

| Parameter                | Value             |
|--------------------------|-------------------|
| 1 Instrument             | Avance<br>NEO 500 |
| 2 Solvent                | CDCl3             |
| 3 Temperature            | 295.2             |
| 4 Pulse Sequence         | zgpg30            |
| 5 Number of Scans        | 200               |
| 6 Receiver Gain          | 101.0             |
| 7 Relaxation Delay       | 2.0000            |
| 8 Pulse Width            | 10.0000           |
| 9 Spectrometer Frequency | 125.78            |
| 10 Spectral Width        | 30120.5           |
| 11 Lowest Frequency      | -2467.7           |
| 12 Nucleus               | 13C               |
| 13 Acquired Size         | 32768             |
| 14 Spectral Size         | 65536             |



1-benzyl-3-(4-(tert-butyl)benzyl)quinazoline-2,4(1H,3H)-dione (5b)

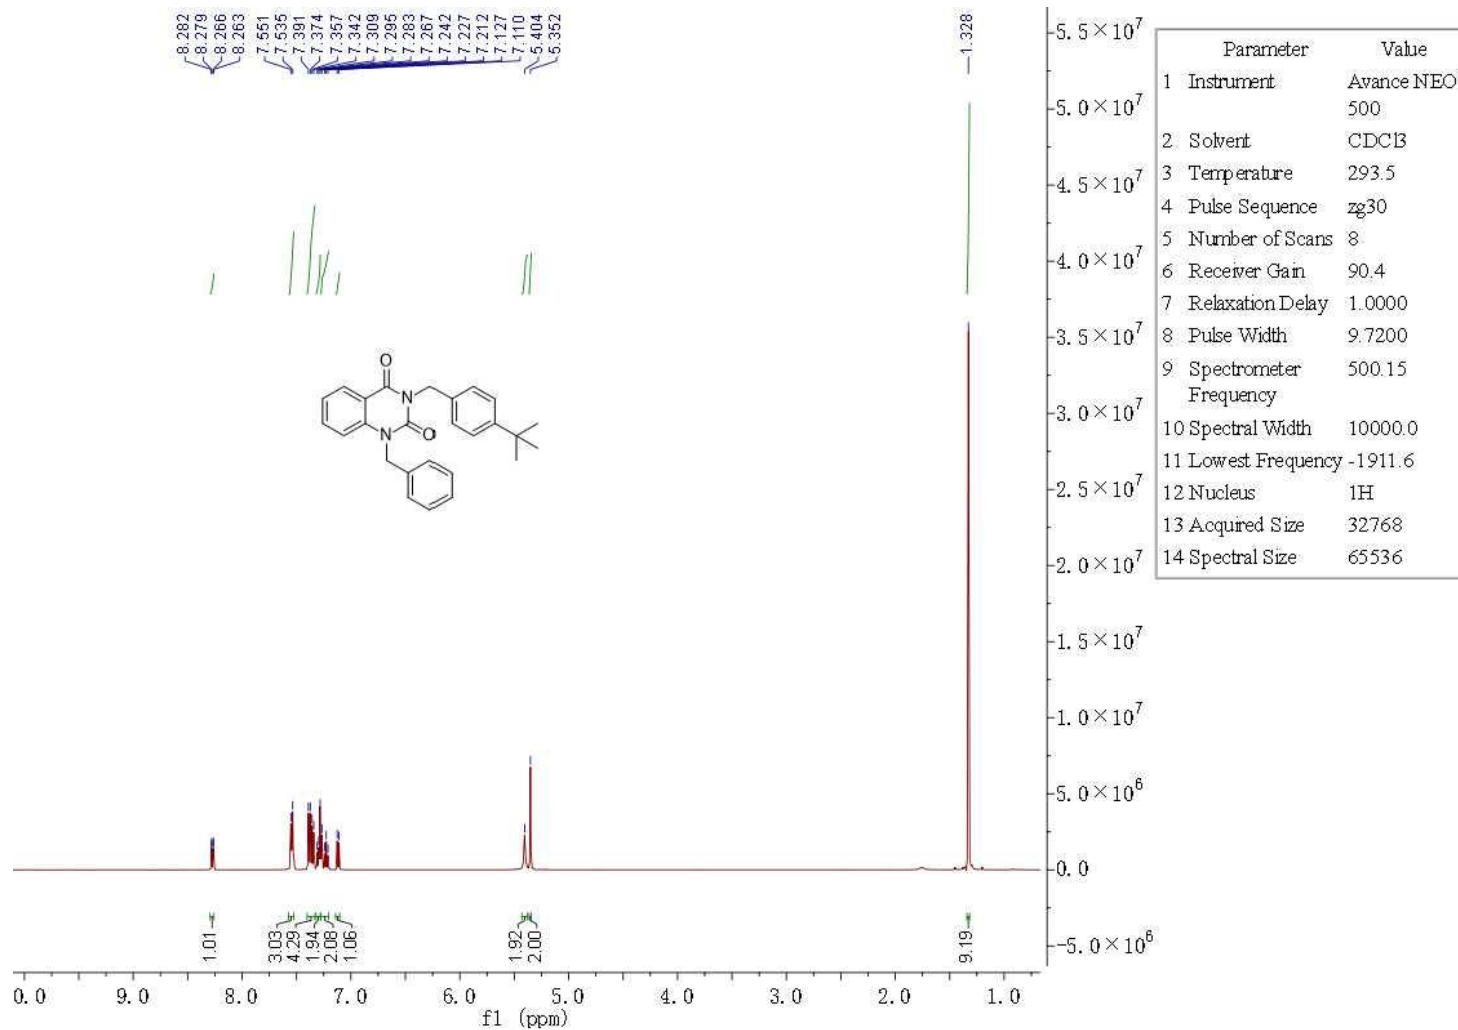

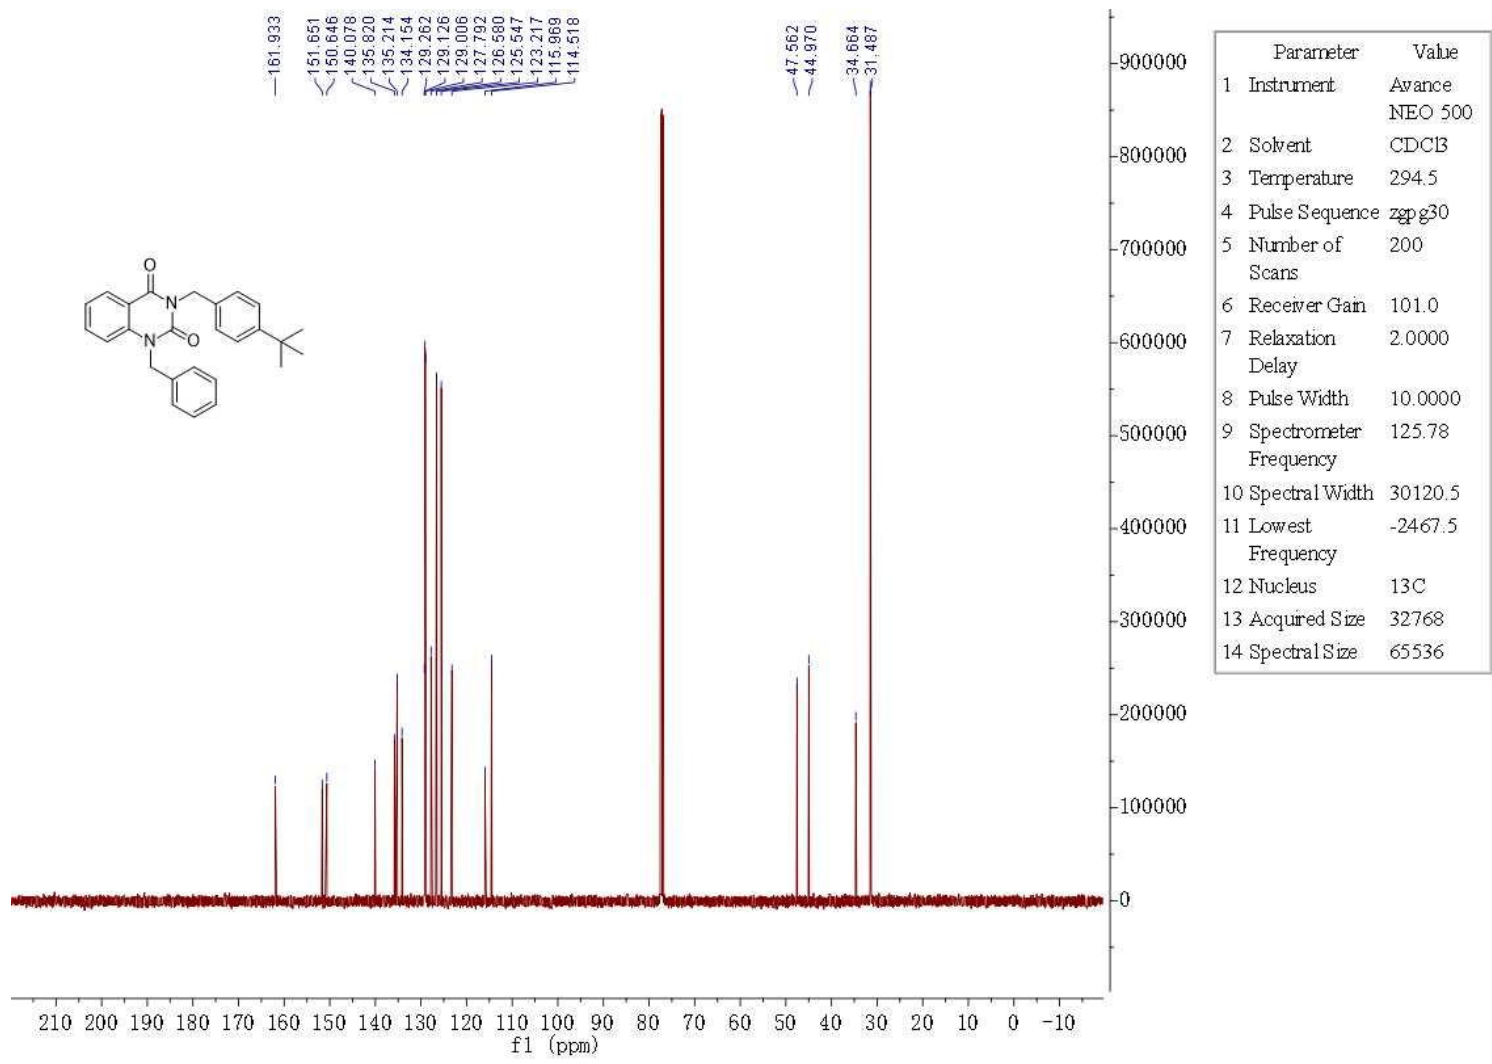

1-benzyl-3-(4-bromobenzyl)quinazoline-2,4(1H,3H)-dione (5c)

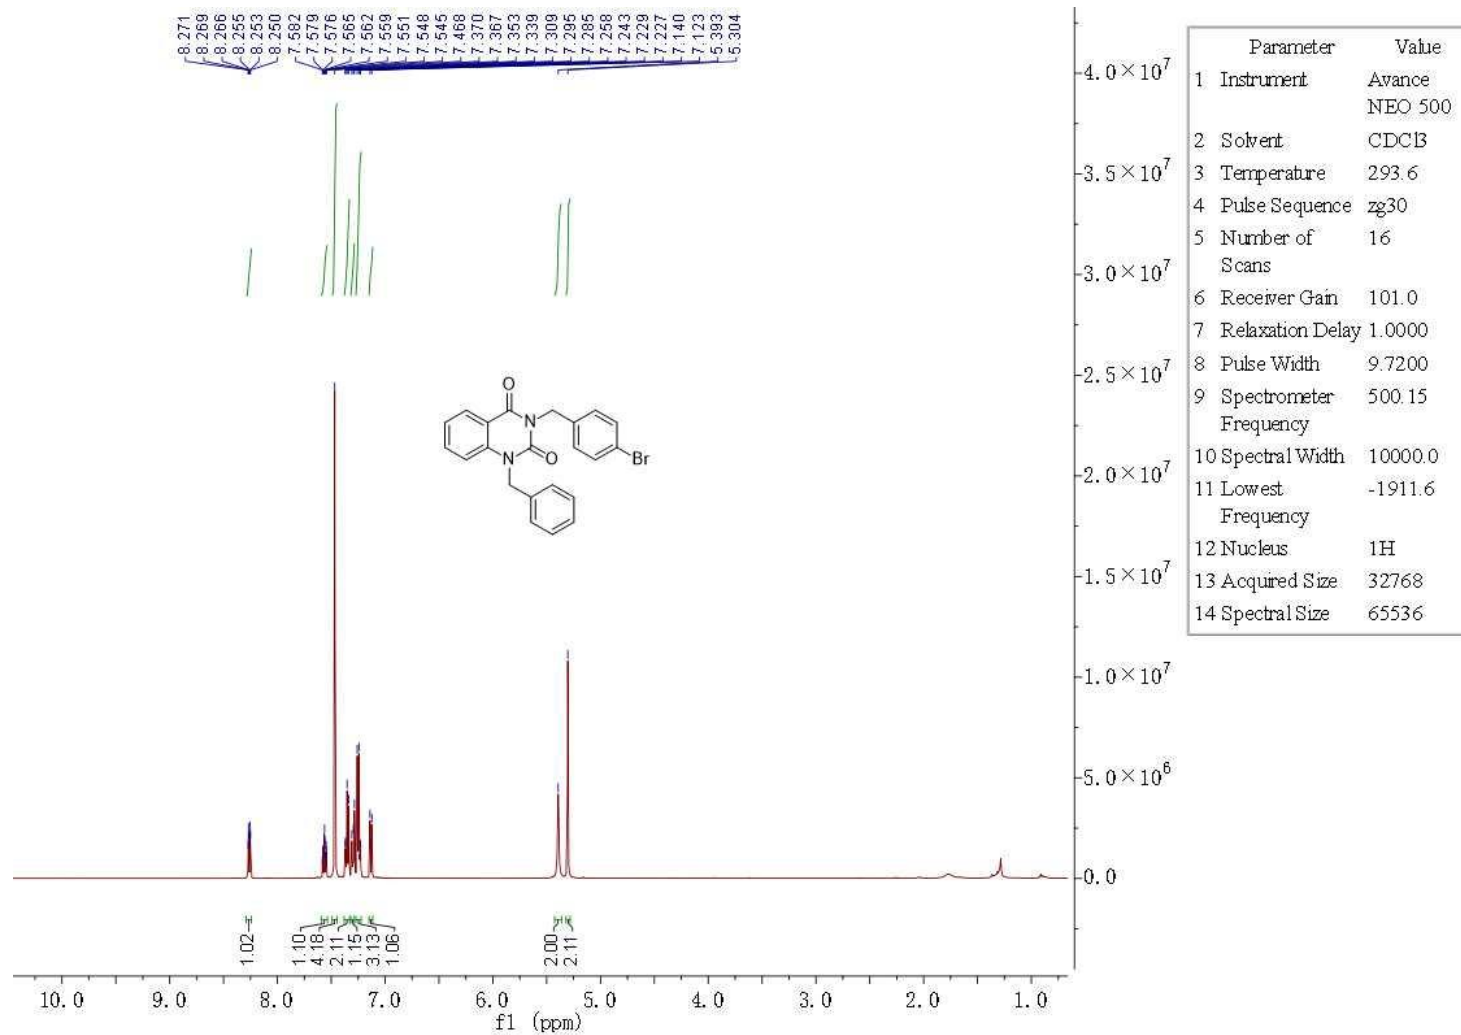

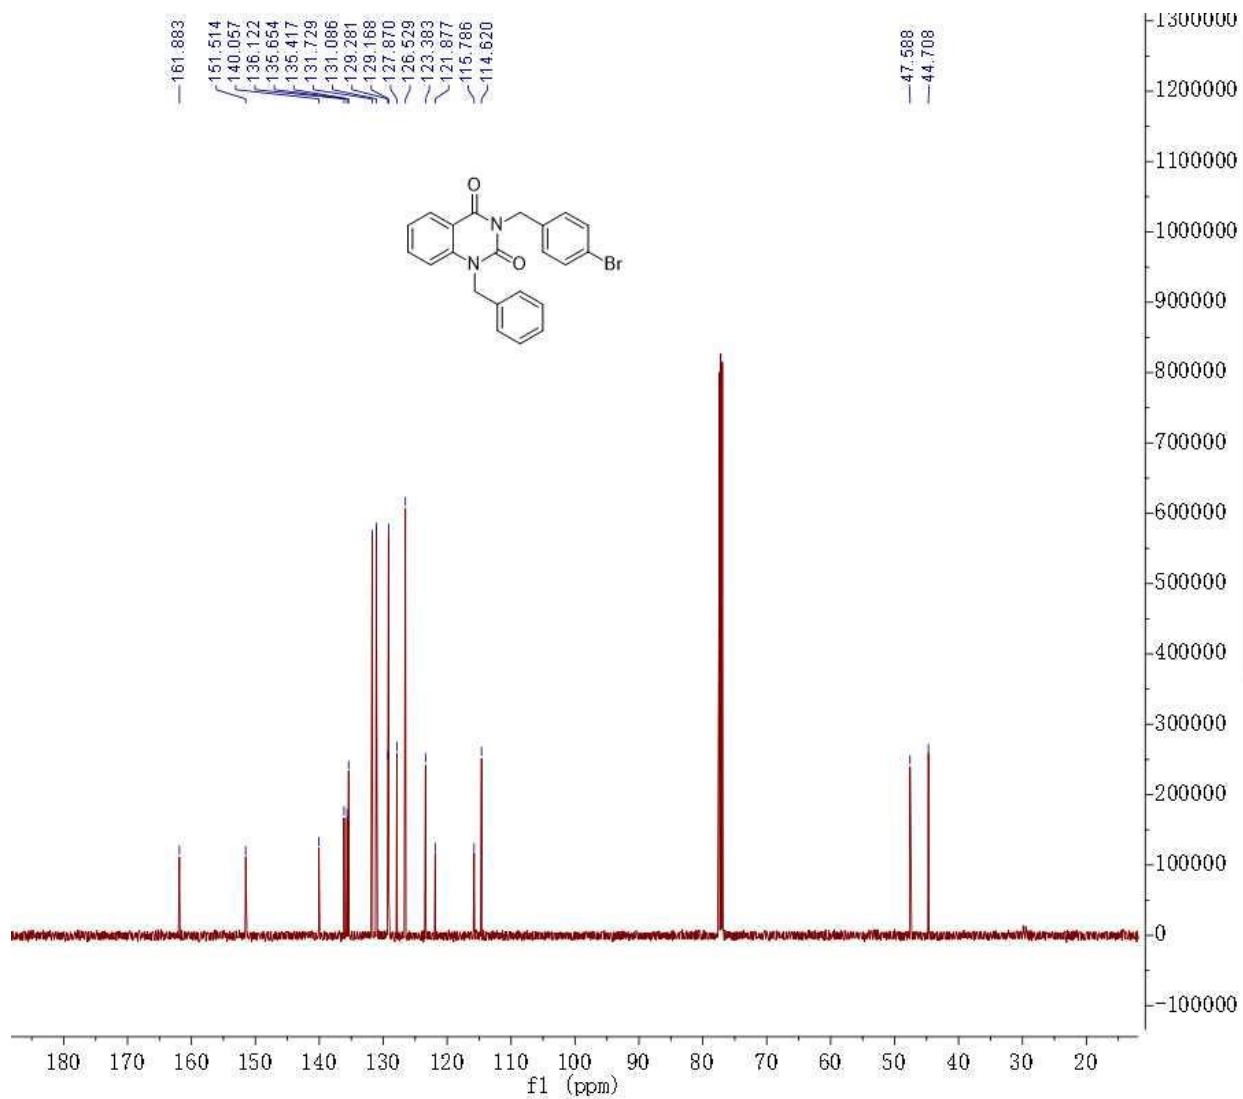

| Parameter                | Value             |
|--------------------------|-------------------|
| 1 Instrument             | Avance<br>NEO 500 |
| 2 Solvent                | CDCl3             |
| 3 Temperature            | 294.8             |
| 4 Pulse Sequence         | zgpg30            |
| 5 Number of Scans        | 200               |
| 6 Receiver Gain          | 101.0             |
| 7 Relaxation Delay       | 2.0000            |
| 8 Pulse Width            | 10.0000           |
| 9 Spectrometer Frequency | 125.78            |
| 10 Spectral Width        | 30120.5           |
| 11 Lowest Frequency      | -2467.7           |
| 12 Nucleus               | 13C               |
| 13 Acquired Size         | 32768             |
| 14 Spectral Size         | 65536             |

1-benzyl-3-(4-(trifluoromethyl)benzyl)quinazoline-2,4(1H,3H)-dione (5d)

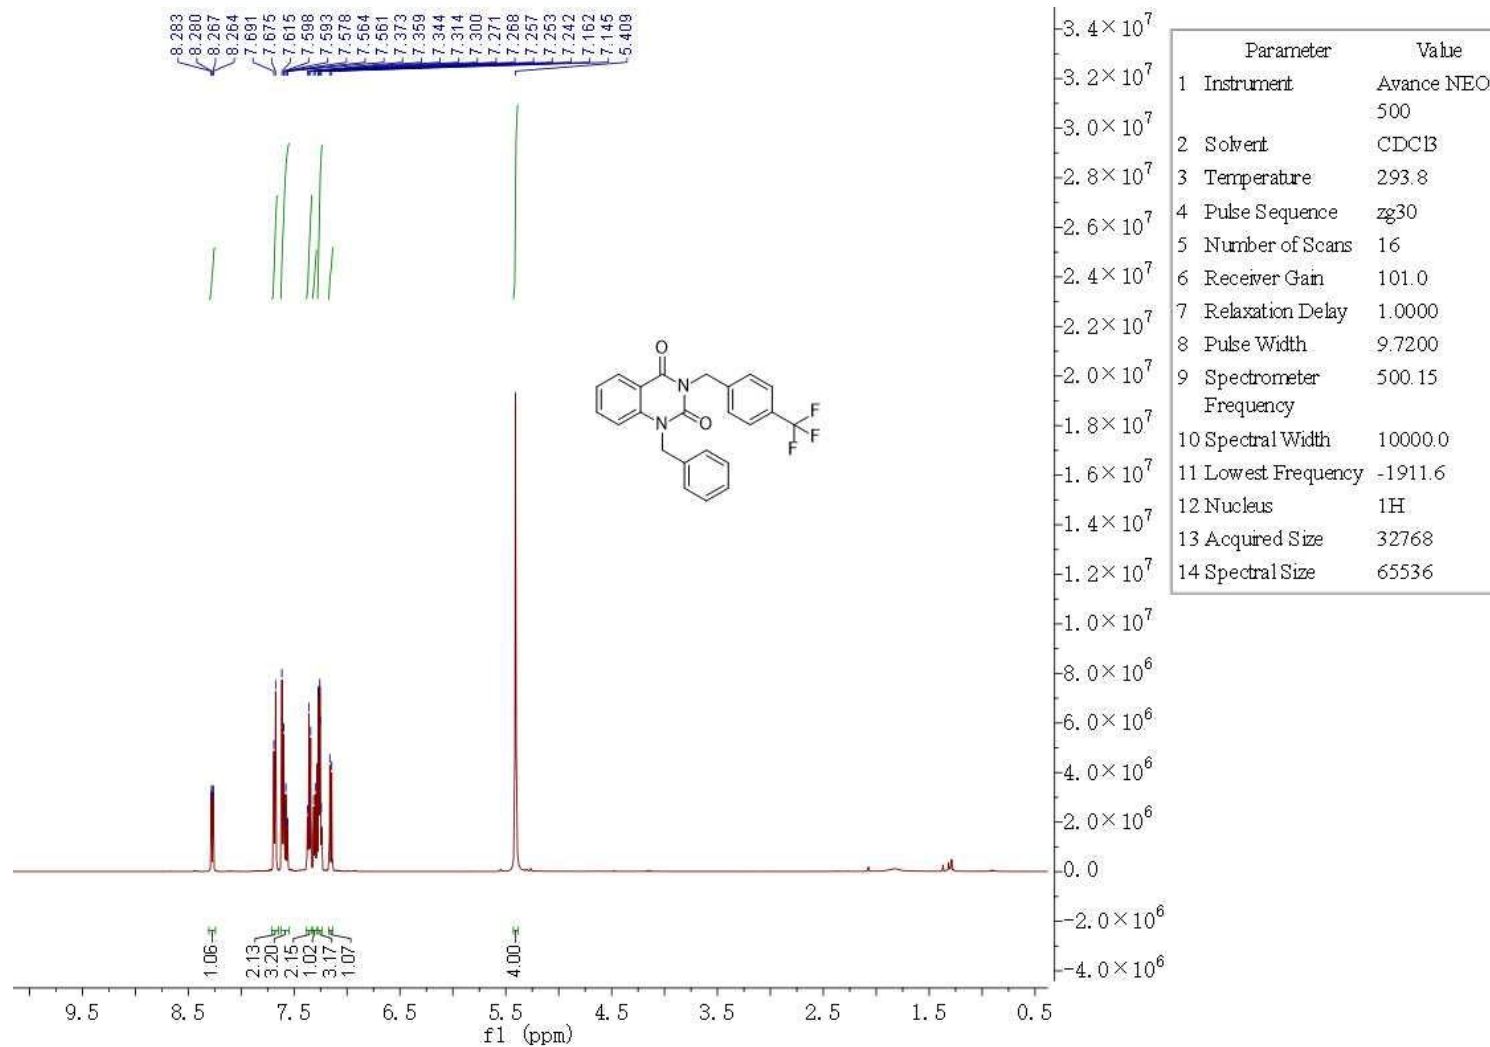

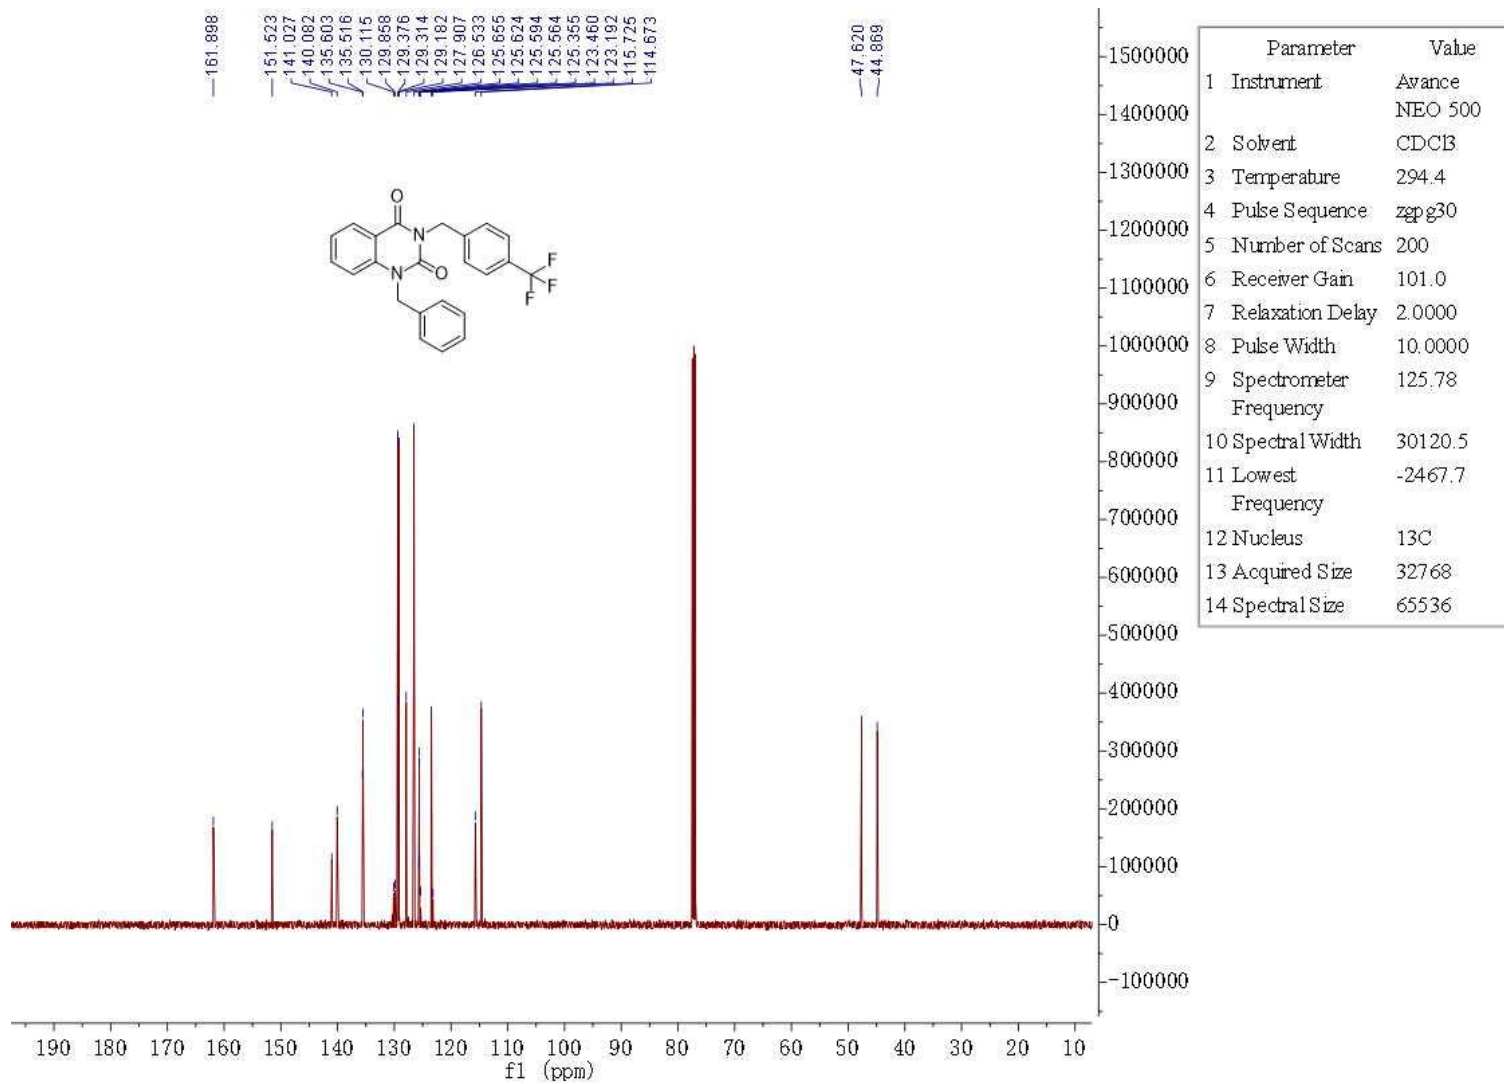

**1-benzyl-3-(2-chlorobenzyl)quinazoline-2,4(1H,3H)-dione (5e)**

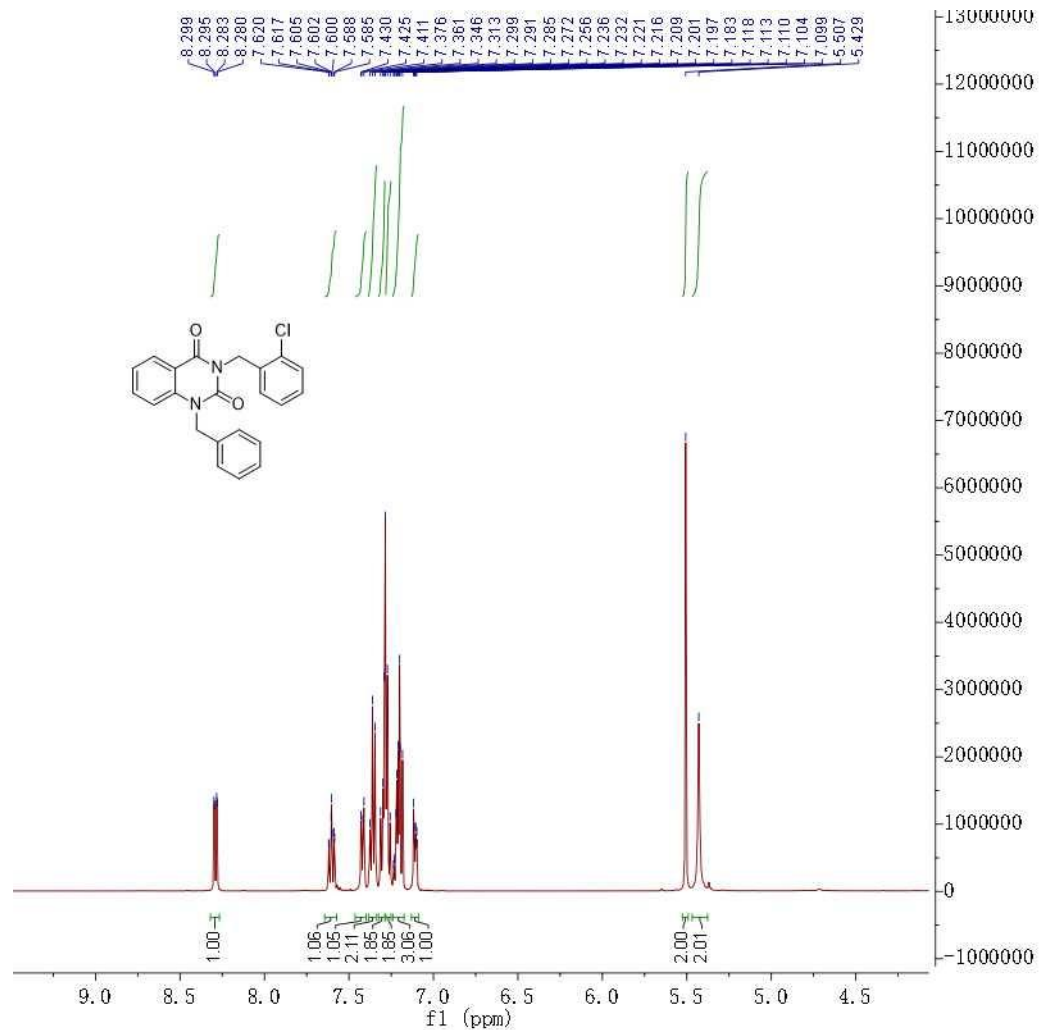

| Parameter           | Value          |
|---------------------|----------------|
| 1 Instrument        | Avance NEO 500 |
| 2 Solvent           | CDCl3          |
| 3 Temperature       | 293.8          |
| 4 Pulse Sequence    | zg30           |
| 5 Number of Scans   | 16             |
| 6 Receiver Gain     | 101.0          |
| 7 Relaxation Delay  | 1.0000         |
| 8 Pulse Width       | 9.7200         |
| 9 Spectrometer      | 500.15         |
| Frequency           |                |
| 10 Spectral Width   | 10000.0        |
| 11 Lowest Frequency | -1911.6        |
| 12 Nucleus          | 1H             |
| 13 Acquired Size    | 32768          |
| 14 Spectral Size    | 65536          |

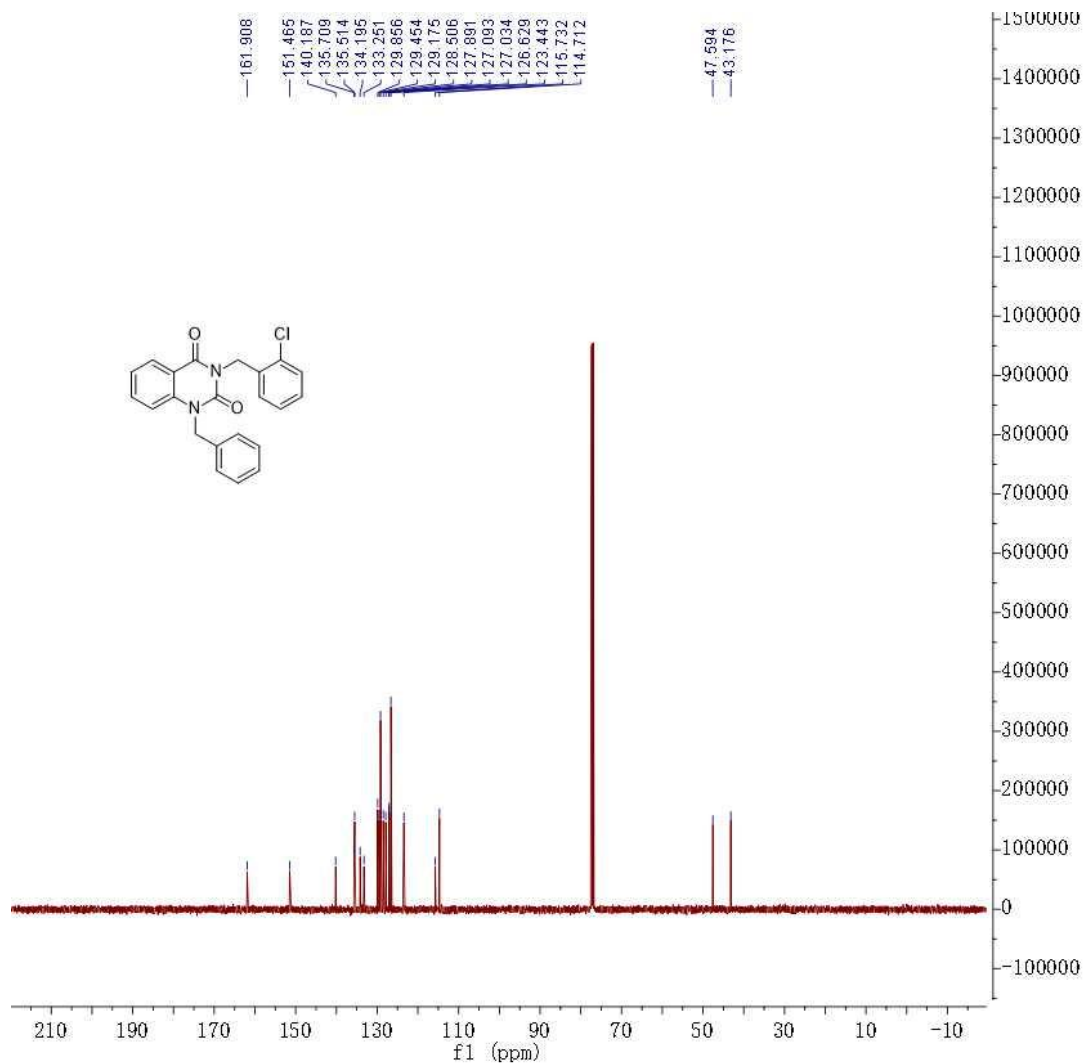

| Parameter                | Value      |
|--------------------------|------------|
| 1 Instrument             | Avance NEO |
| 2 Solvent                | CDCl3      |
| 3 Temperature            | 294.5      |
| 4 Pulse Sequence         | zgpg30     |
| 5 Number of Scans        | 200        |
| 6 Receiver Gain          | 101.0      |
| 7 Relaxation Delay       | 2.0000     |
| 8 Pulse Width            | 10.0000    |
| 9 Spectrometer Frequency | 125.78     |
| 10 Spectral Width        | 30120.5    |
| 11 Lowest Frequency      | -2484.0    |
| 12 Nucleus               | 13C        |
| 13 Acquired Size         | 32768      |
| 14 Spectral Size         | 65536      |



**1-benzyl-3-(2-bromobenzyl)quinazoline-2,4(1H,3H)-dione (5f)**

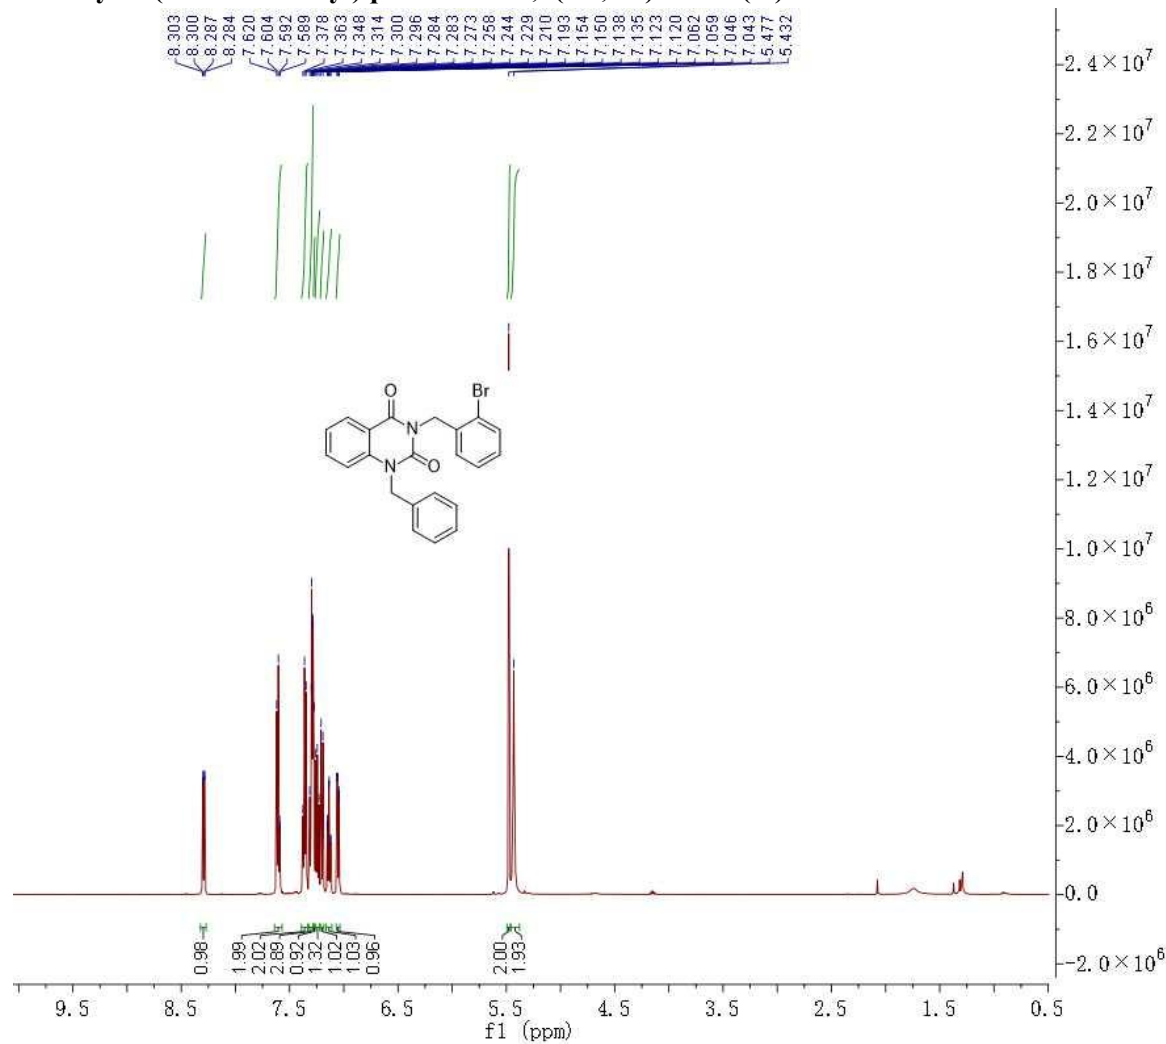

| Parameter           | Value      |
|---------------------|------------|
| 1 Instrument        | Avance NEO |
| 2 Solvent           | CDCl3      |
| 3 Temperature       | 293.6      |
| 4 Pulse Sequence    | zg30       |
| 5 Number of Scans   | 16         |
| 6 Receiver Gain     | 101.0      |
| 7 Relaxation Delay  | 1.0000     |
| 8 Pulse Width       | 9.7200     |
| 9 Spectrometer      | 500.15     |
| Frequency           |            |
| 10 Spectral Width   | 10000.0    |
| 11 Lowest Frequency | -1911.6    |
| 12 Nucleus          | 1H         |
| 13 Acquired Size    | 32768      |
| 14 Spectral Size    | 65536      |

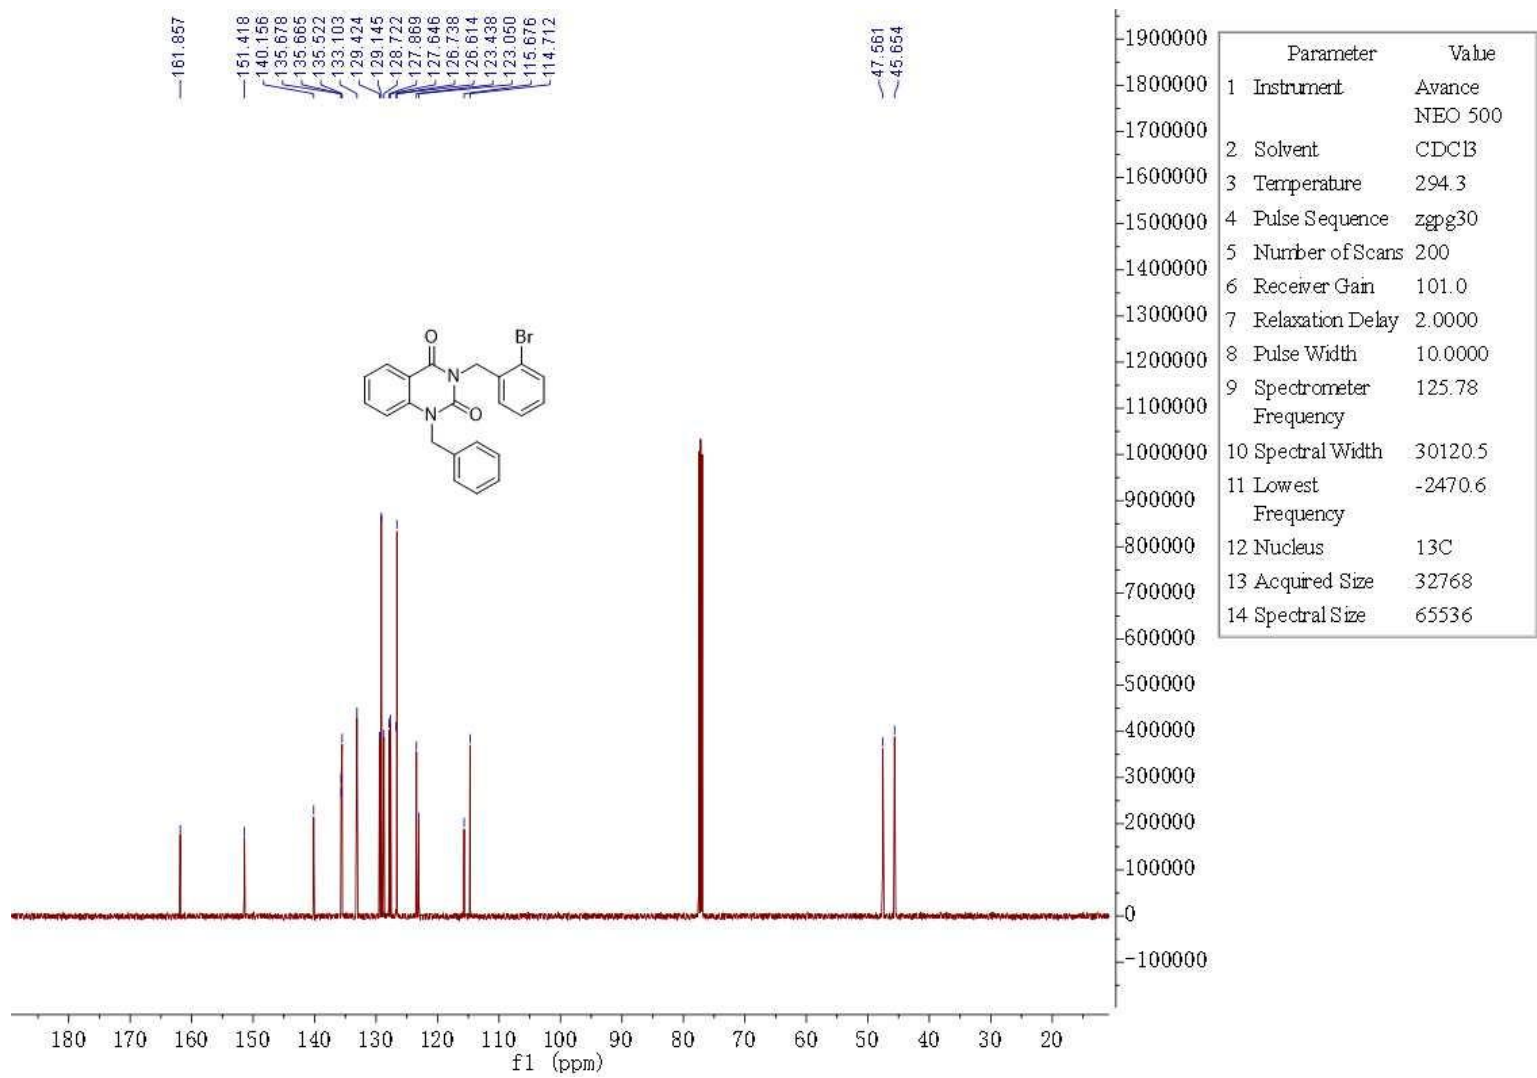

1-benzyl-3-(2-iodobenzyl)quinazoline-2,4(1H,3H)-dione (5g)

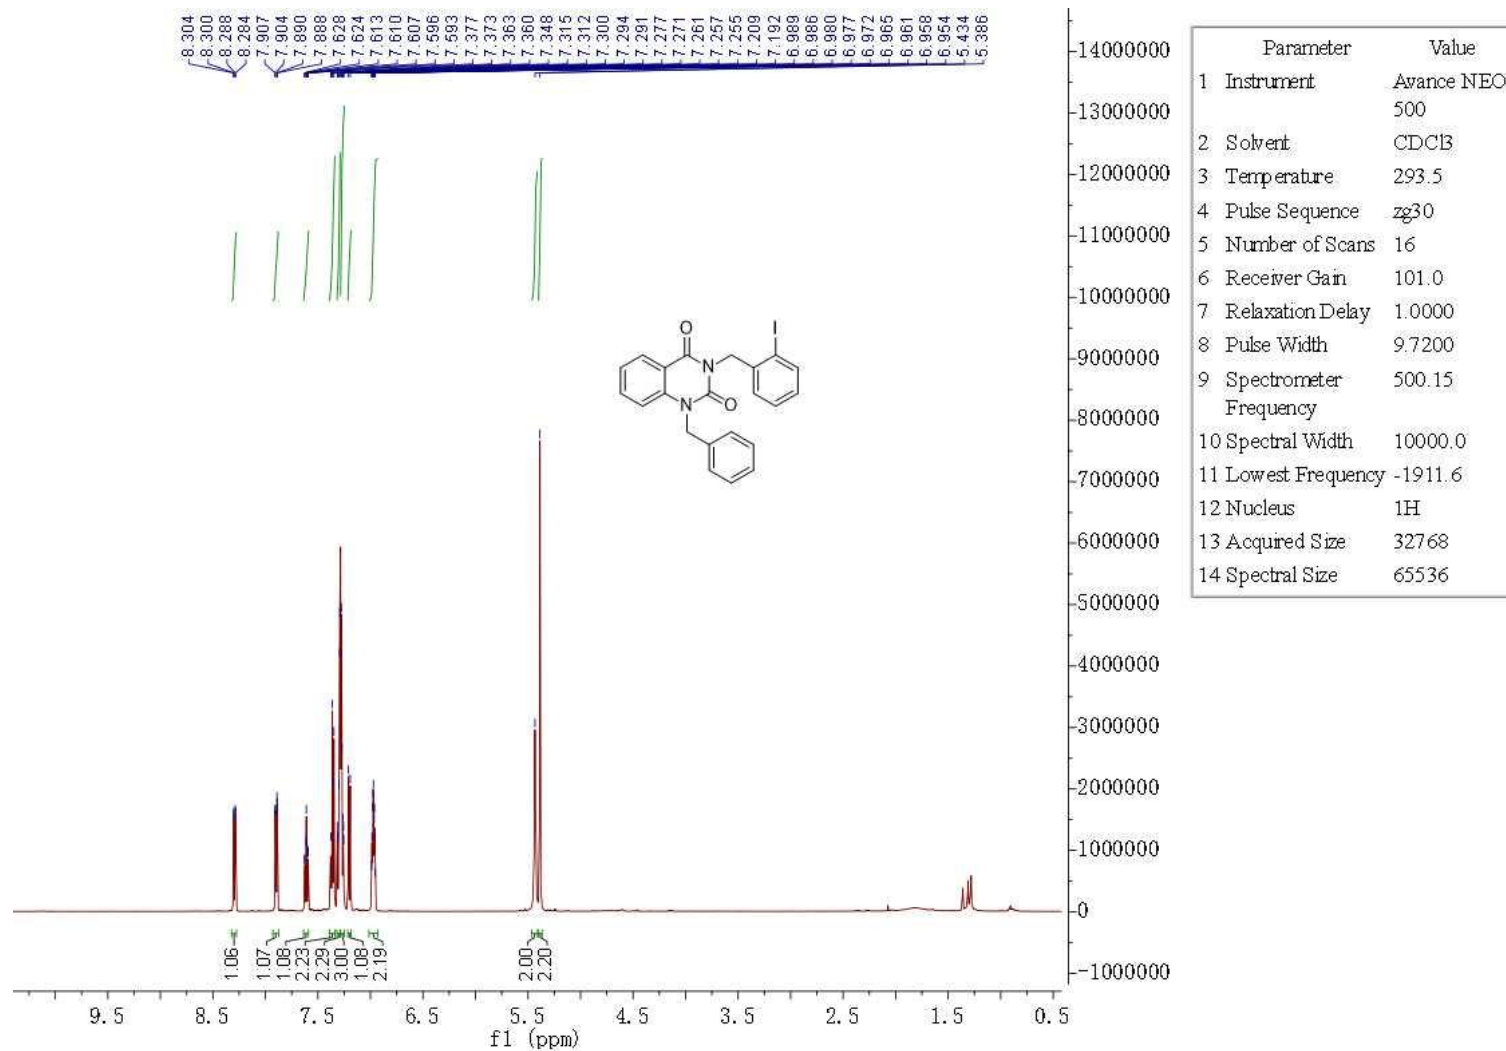

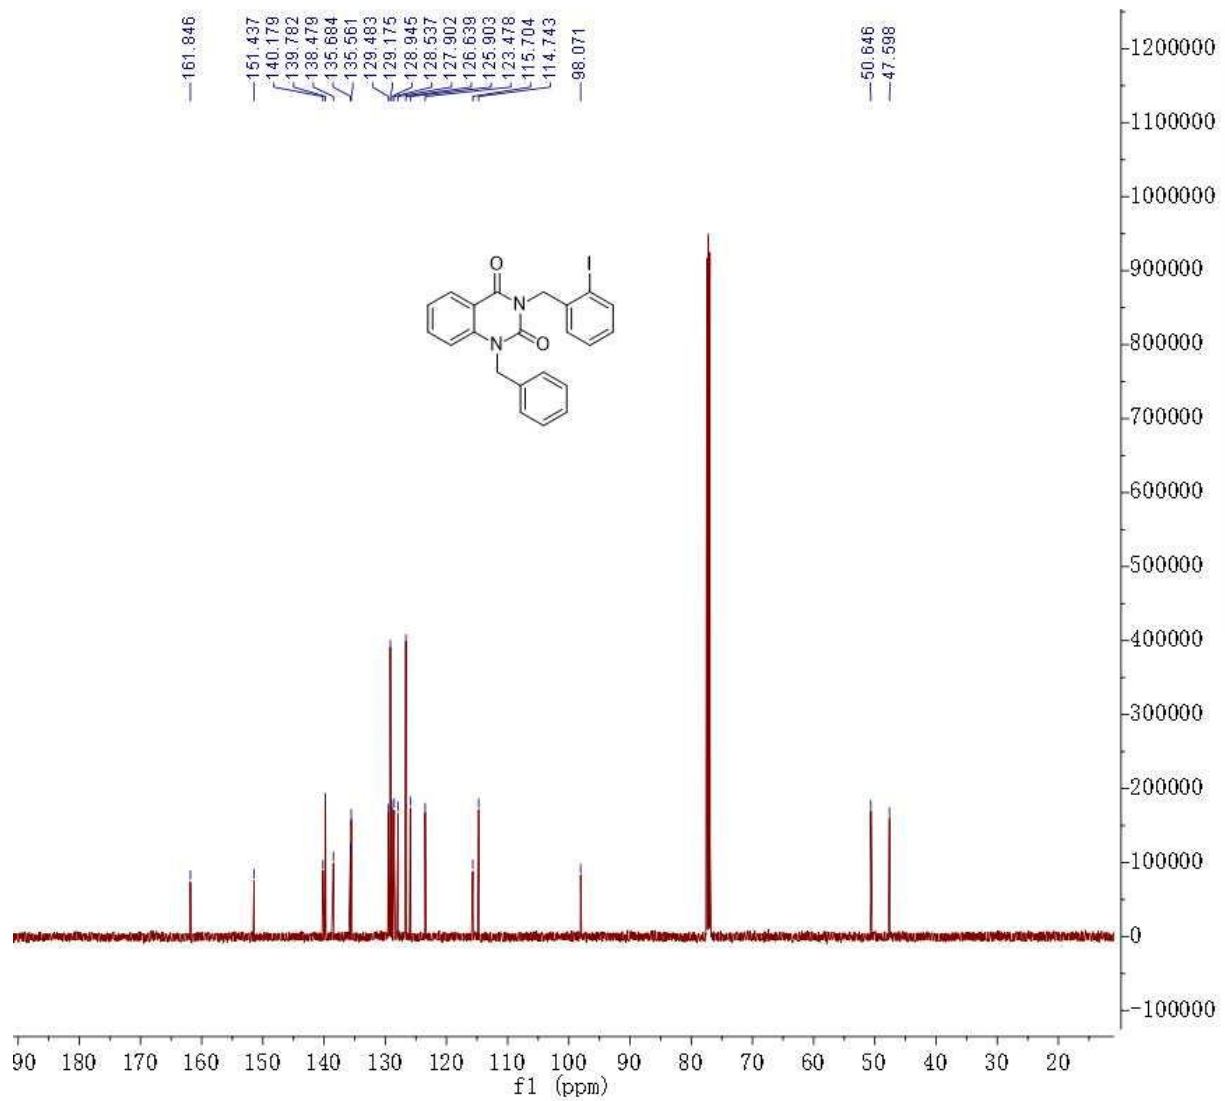

| Parameter                | Value             |
|--------------------------|-------------------|
| 1 Instrument             | Avance NEO        |
| 2 Solvent                | CDCl <sub>3</sub> |
| 3 Temperature            | 294.3             |
| 4 Pulse Sequence         | zgpg30            |
| 5 Number of Scans        | 200               |
| 6 Receiver Gain          | 101.0             |
| 7 Relaxation Delay       | 2.0000            |
| 8 Pulse Width            | 10.0000           |
| 9 Spectrometer Frequency | 125.78            |
| 10 Spectral Width        | 30120.5           |
| 11 Lowest Frequency      | -2466.9           |
| 12 Nucleus               | <sup>13</sup> C   |
| 13 Acquired Size         | 32768             |
| 14 Spectral Size         | 65536             |

**1-benzyl-3-(3,5-bis(trifluoromethyl)benzyl)quinazoline-2,4(1H,3H)-dione (5h)**

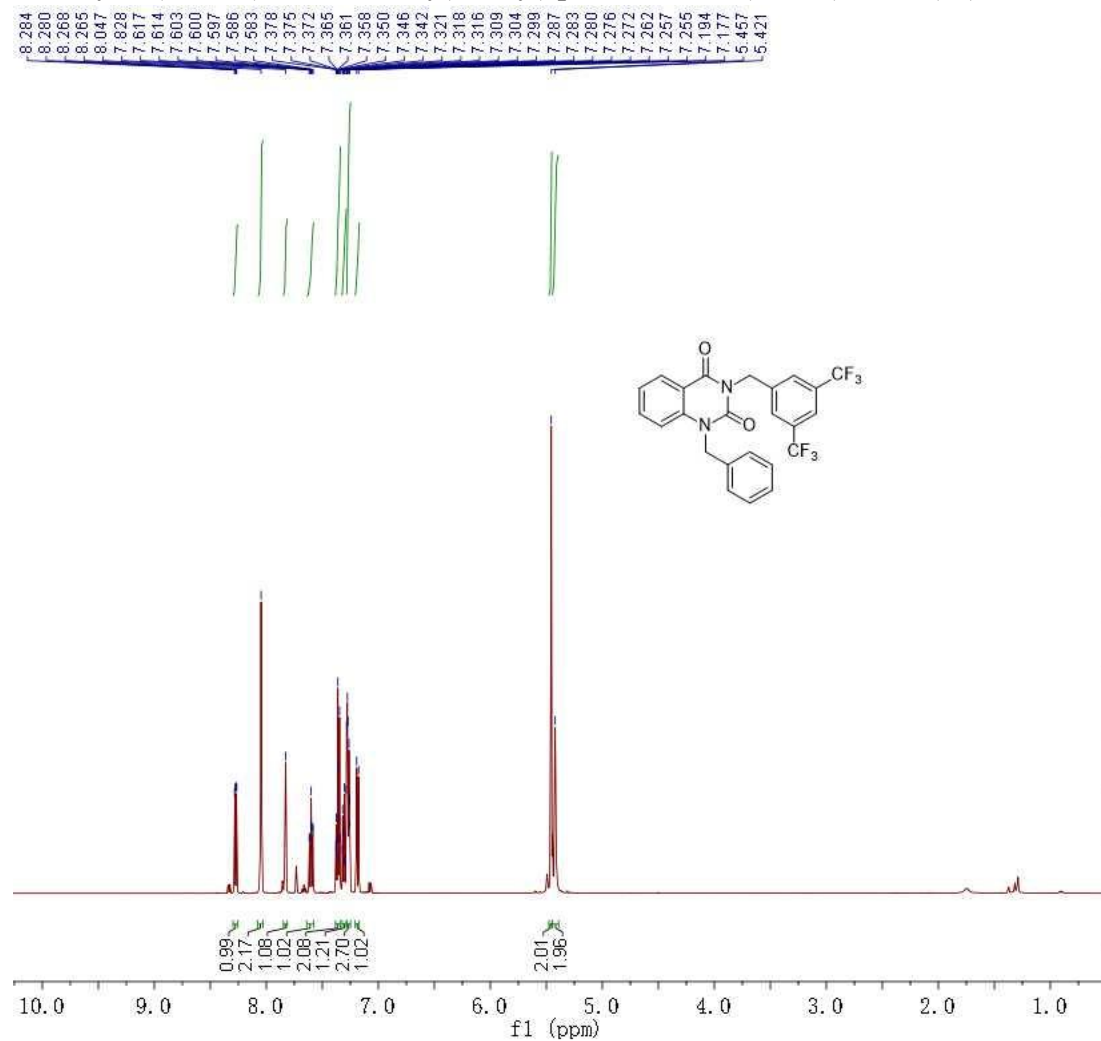

| Parameter                | Value             |
|--------------------------|-------------------|
| 1 Instrument             | Avance<br>NEO 500 |
| 2 Solvent                | CDCl3             |
| 3 Temperature            | 293.6             |
| 4 Pulse Sequence         | zg30              |
| 5 Number of Scans        | 16                |
| 6 Receiver Gain          | 101.0             |
| 7 Relaxation Delay       | 1.0000            |
| 8 Pulse Width            | 9.7200            |
| 9 Spectrometer Frequency | 500.15            |
| 10 Spectral Width        | 10000.0           |
| 11 Lowest Frequency      | -1911.6           |
| 12 Nucleus               | 1H                |
| 13 Acquired Size         | 32768             |
| 14 Spectral Size         | 65536             |

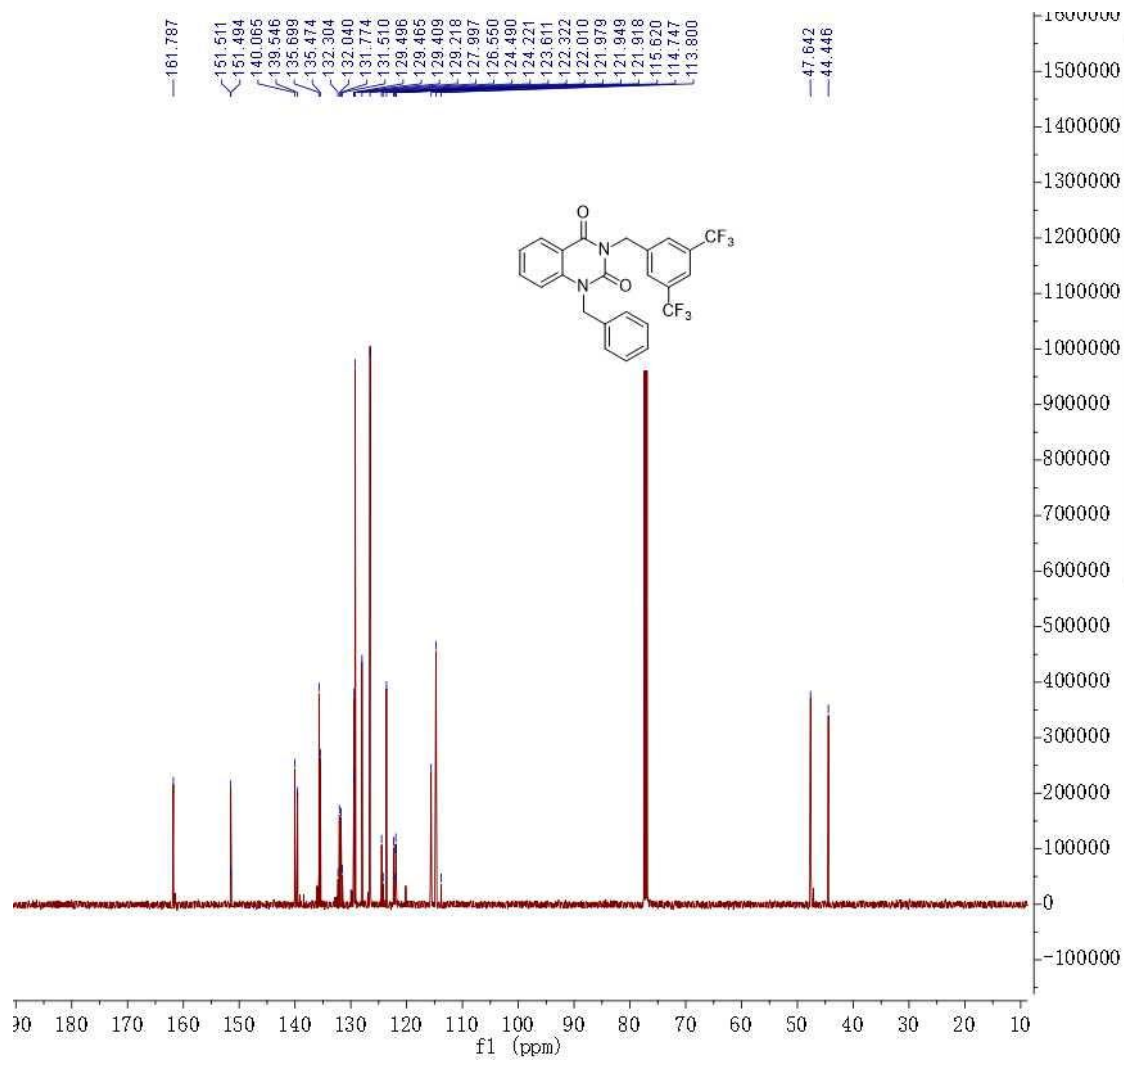

| Parameter                | Value      |
|--------------------------|------------|
| 1 Instrument             | Avance NEO |
| 2 Solvent                | CDCl3      |
| 3 Temperature            | 294.1      |
| 4 Pulse Sequence         | zgpg30     |
| 5 Number of Scans        | 200        |
| 6 Receiver Gain          | 101.0      |
| 7 Relaxation Delay       | 2.0000     |
| 8 Pulse Width            | 10.0000    |
| 9 Spectrometer Frequency | 125.78     |
| 10 Spectral Width        | 30120.5    |
| 11 Lowest Frequency      | -2466.0    |
| 12 Nucleus               | 13C        |
| 13 Acquired Size         | 32768      |
| 14 Spectral Size         | 65536      |

**3-allyl-1-benzylquinazoline-2,4(1H,3H)-dione (5i)**

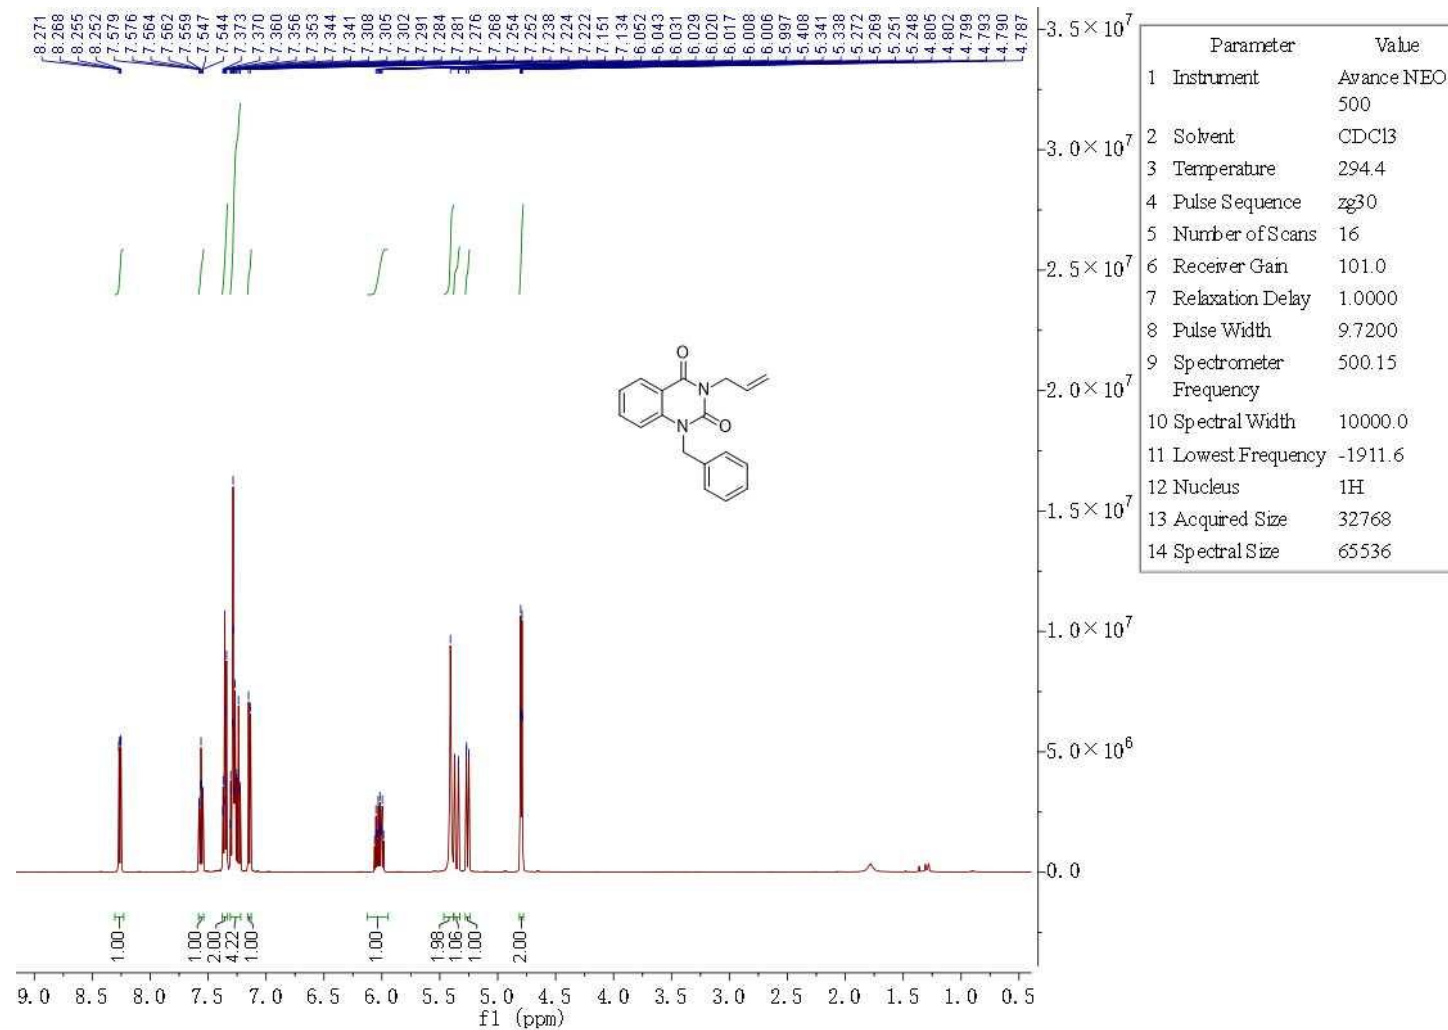



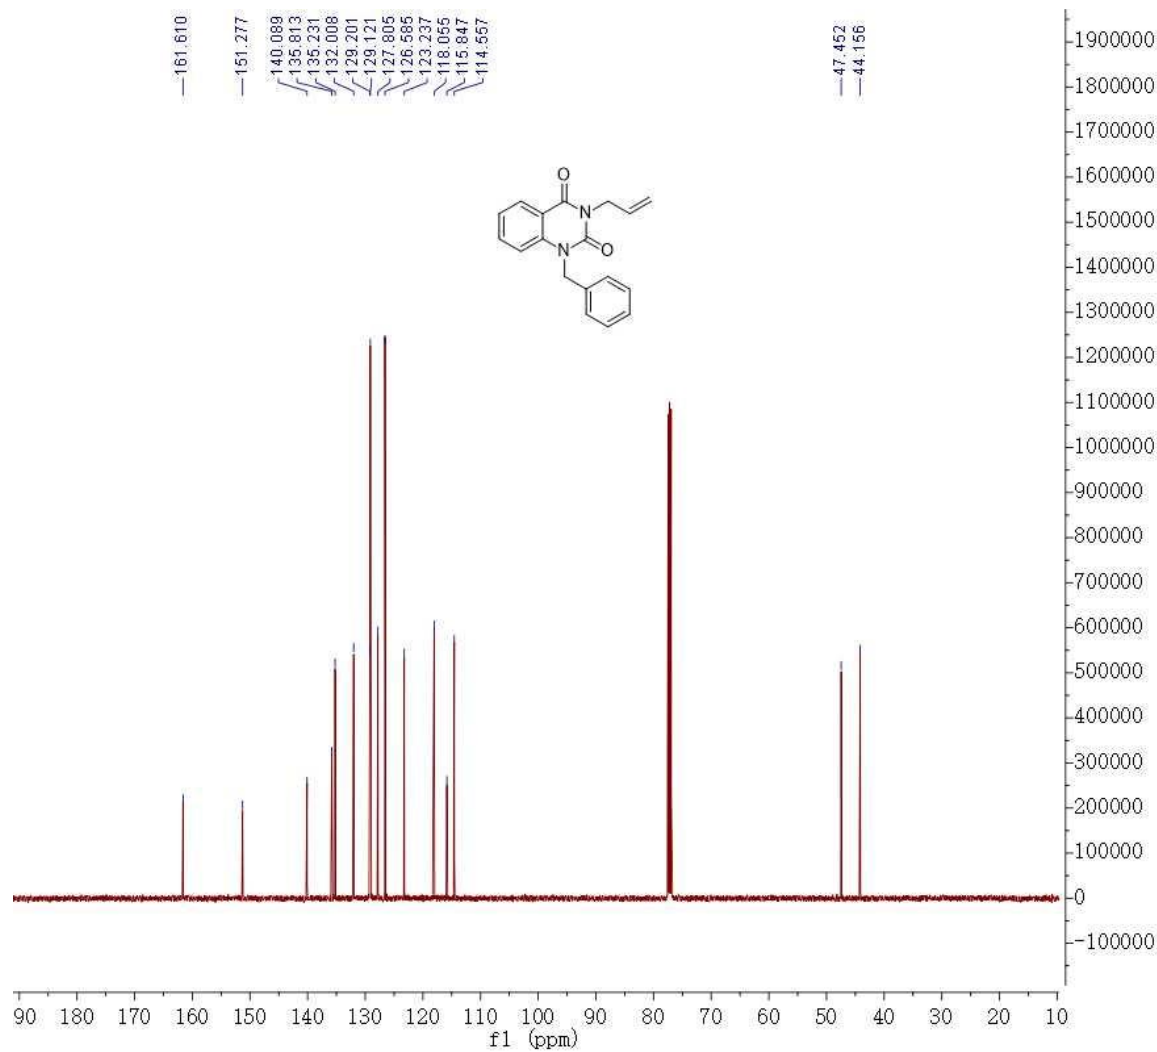

| Parameter                | Value      |
|--------------------------|------------|
| 1 Instrument             | Avance NEO |
| 2 Solvent                | CDCl3      |
| 3 Temperature            | 295.0      |
| 4 Pulse Sequence         | zgpg30     |
| 5 Number of Scans        | 200        |
| 6 Receiver Gain          | 101.0      |
| 7 Relaxation Delay       | 2.0000     |
| 8 Pulse Width            | 10.0000    |
| 9 Spectrometer Frequency | 125.78     |
| 10 Spectral Width        | 30120.5    |
| 11 Lowest Frequency      | -2469.5    |
| 12 Nucleus               | 13C        |
| 13 Acquired Size         | 32768      |
| 14 Spectral Size         | 65536      |



**1,3-dibenzyl-7-methoxyquinazoline-2,4(1H,3H)-dione (5j)**

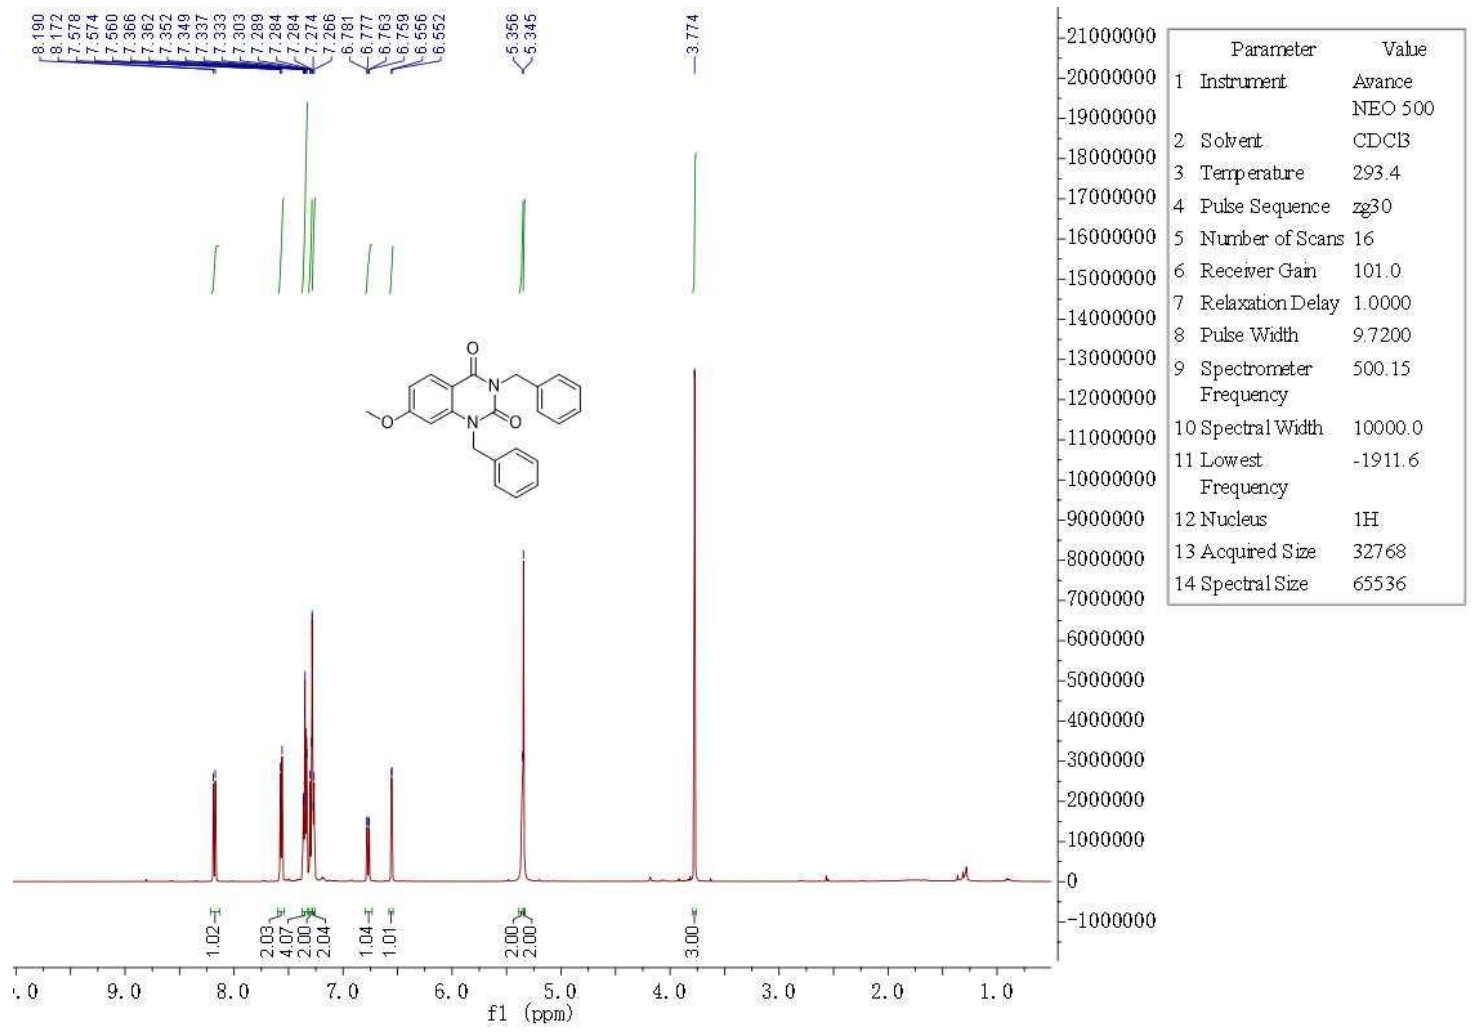

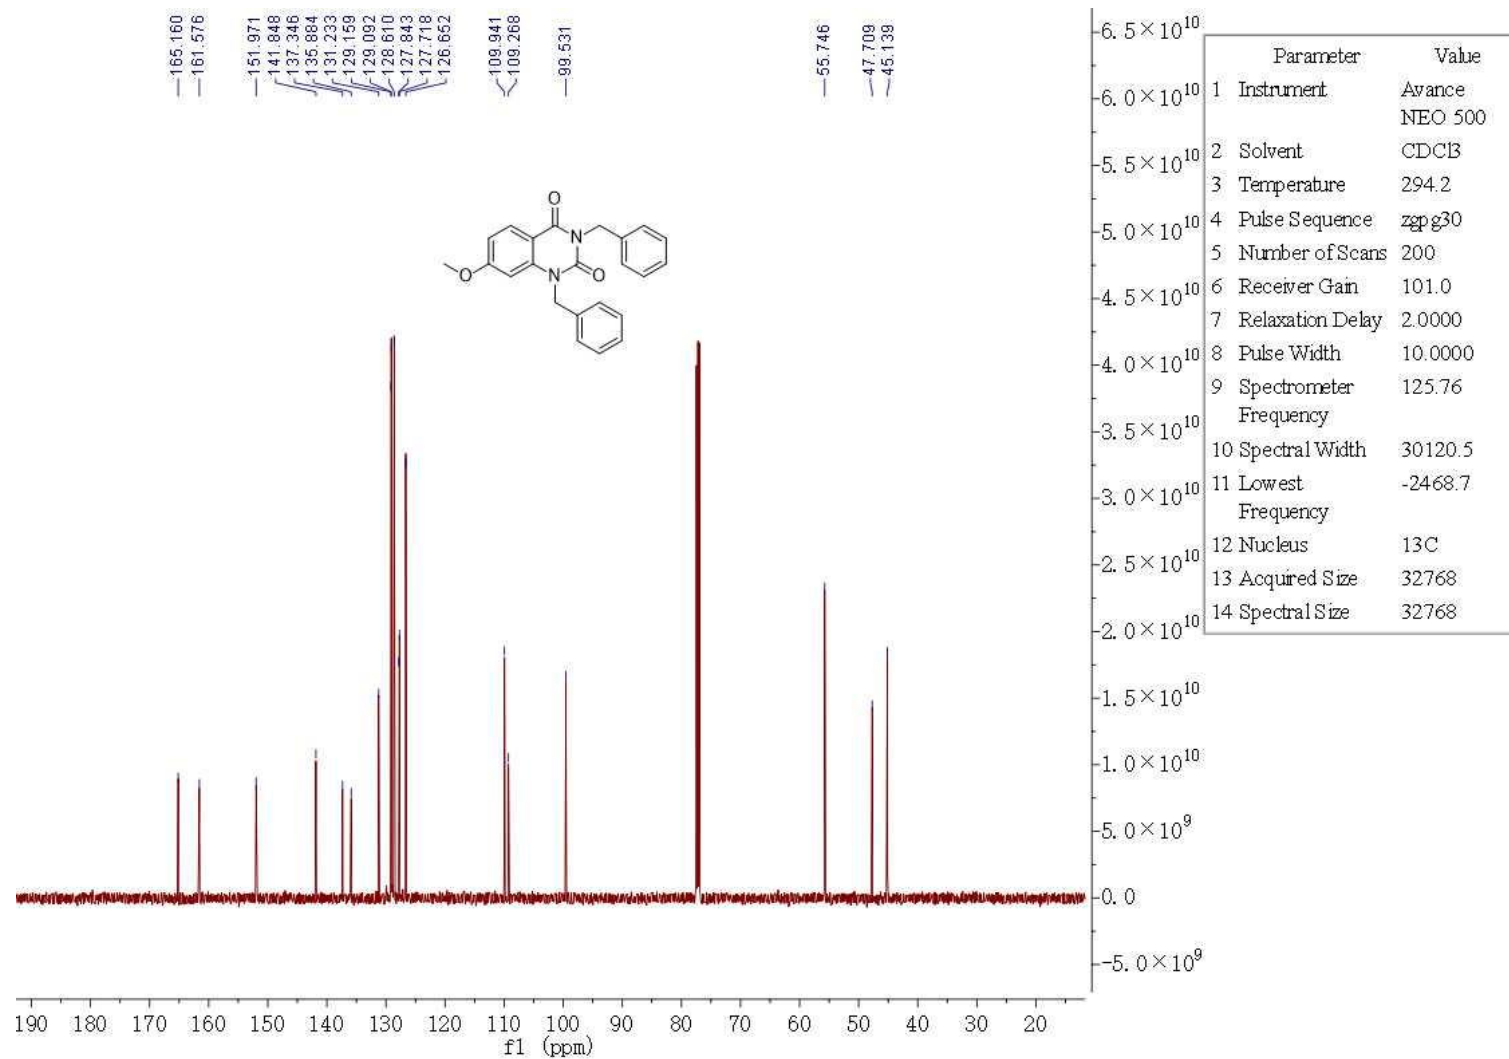

**1,3-dibenzyl-7-fluoroquinazoline-2,4(1H,3H)-dione (5k)**

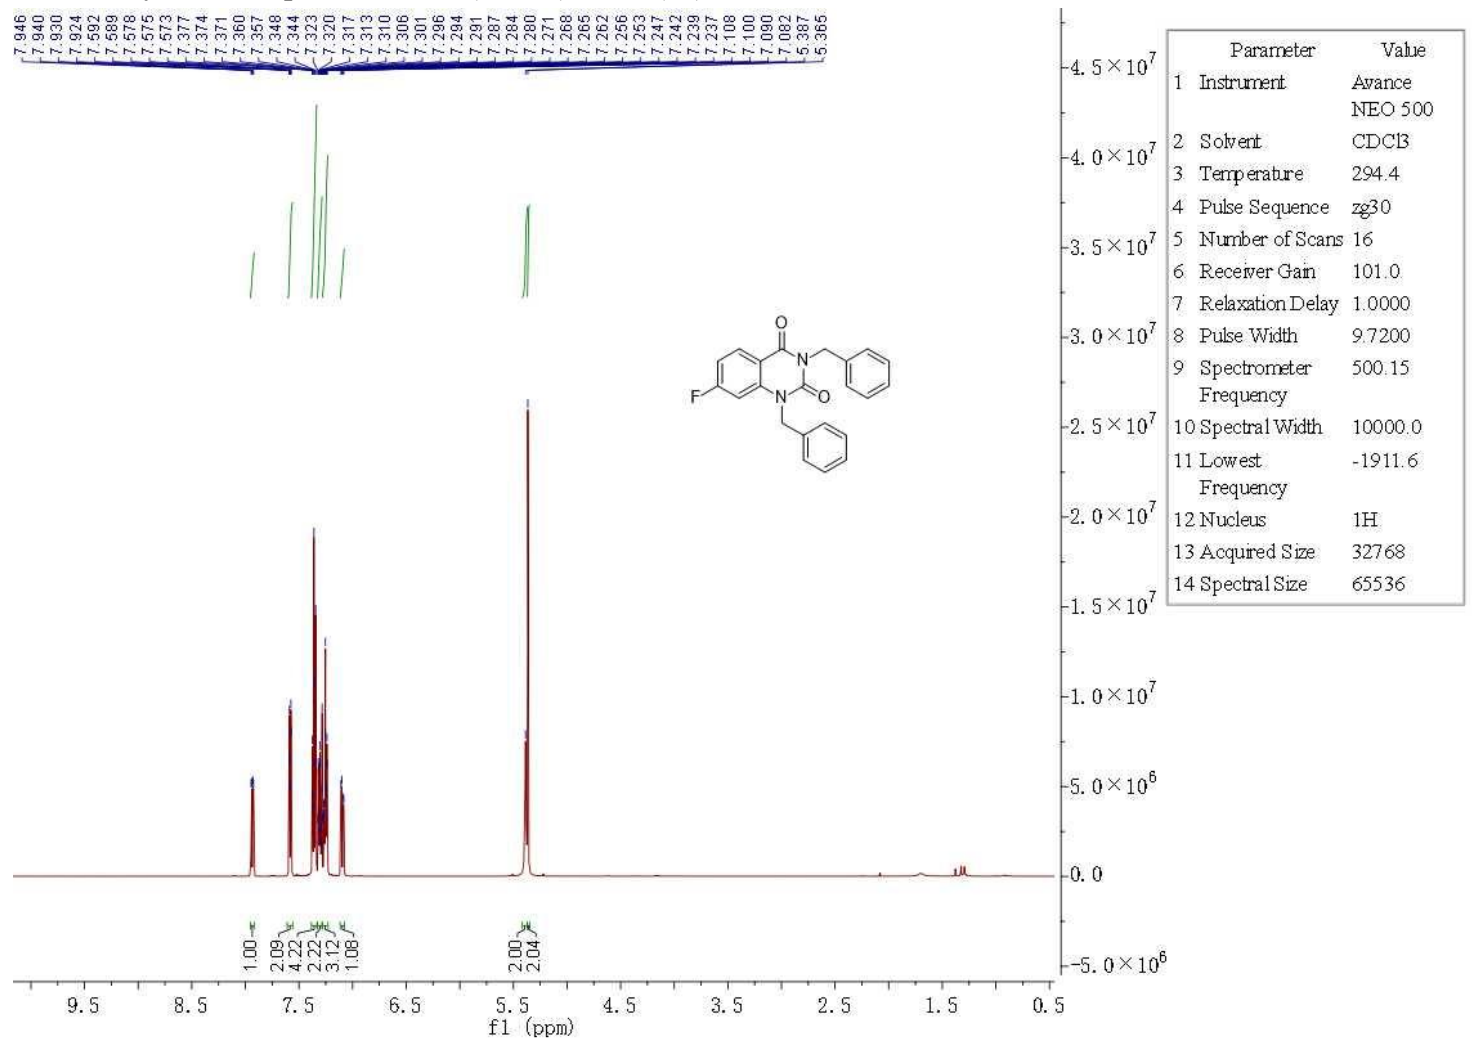

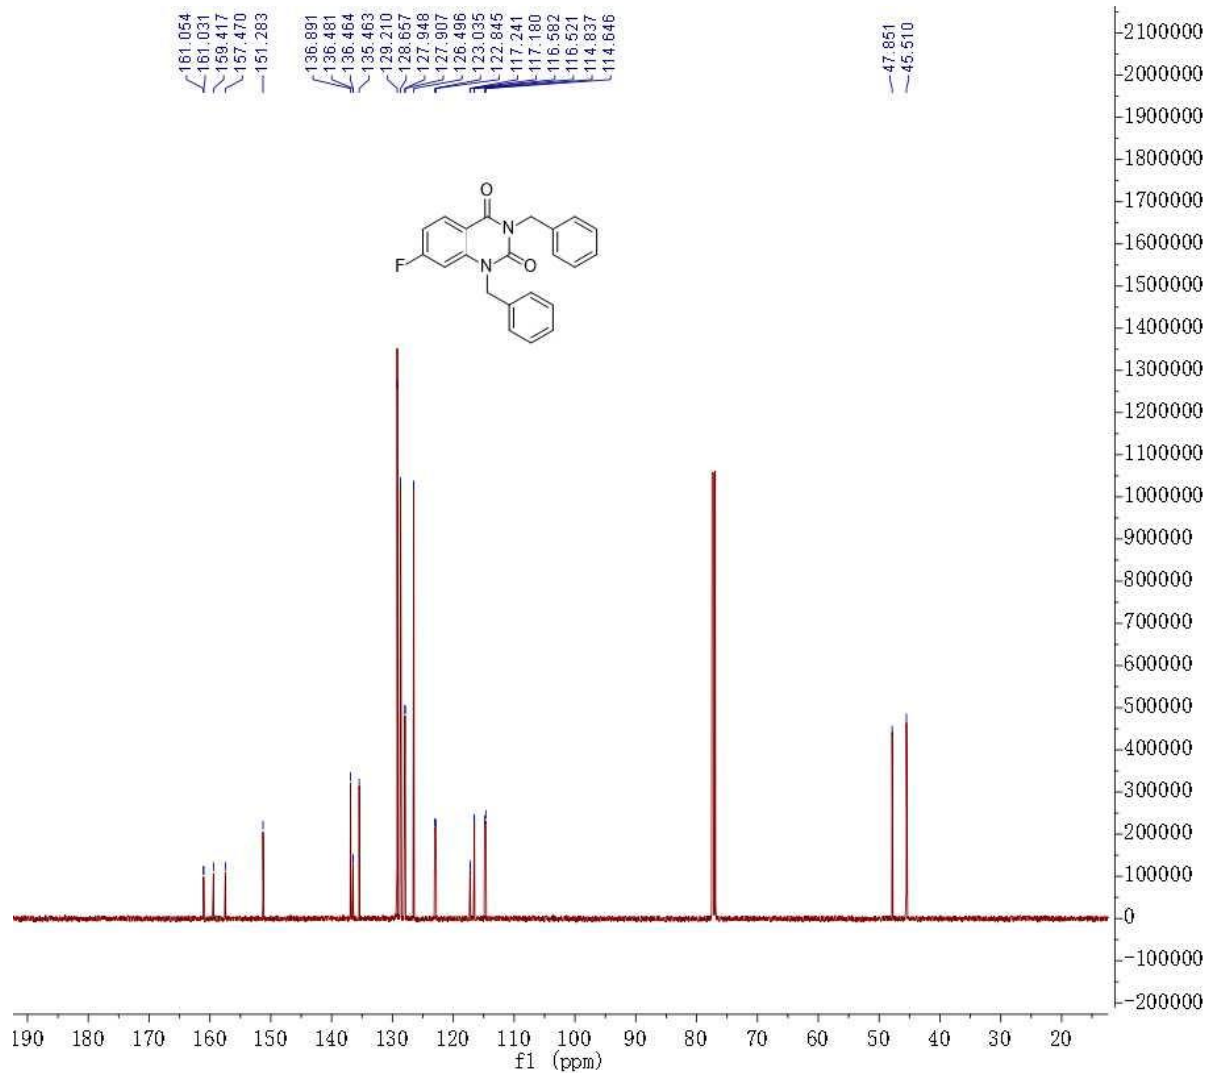

| Parameter                | Value             |
|--------------------------|-------------------|
| 1 Instrument             | Avance<br>NEO 500 |
| 2 Solvent                | CDCl3             |
| 3 Temperature            | 295.1             |
| 4 Pulse Sequence         | zgpg30            |
| 5 Number of Scans        | 200               |
| 6 Receiver Gain          | 101.0             |
| 7 Relaxation Delay       | 2.0000            |
| 8 Pulse Width            | 10.0000           |
| 9 Spectrometer Frequency | 125.78            |
| 10 Spectral Width        | 30120.5           |
| 11 Lowest Frequency      | -2469.9           |
| 12 Nucleus               | 13C               |
| 13 Acquired Size         | 32768             |
| 14 Spectral Size         | 65536             |

**1,3-dibenzyl-7-bromoquinazoline-2,4(1H,3H)-dione (5l)**

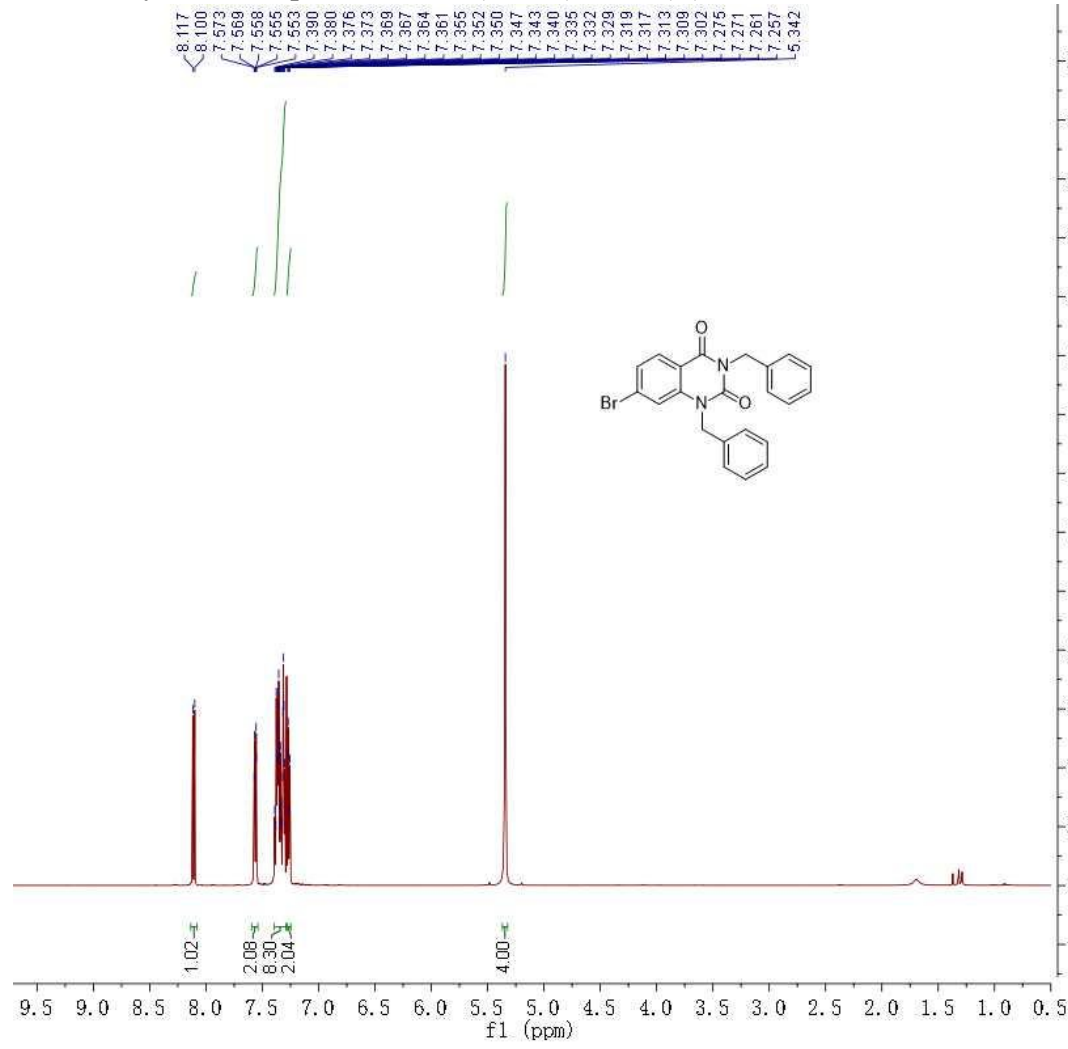

| Parameter                | Value      |
|--------------------------|------------|
| 1 Instrument             | Avance NEO |
| 2 Solvent                | CDCl3      |
| 3 Temperature            | 294.1      |
| 4 Pulse Sequence         | zg30       |
| 5 Number of Scans        | 16         |
| 6 Receiver Gain          | 101.0      |
| 7 Relaxation Delay       | 1.0000     |
| 8 Pulse Width            | 9.7200     |
| 9 Spectrometer Frequency | 500.15     |
| 10 Spectral Width        | 10000.0    |
| 11 Lowest Frequency      | -1911.6    |
| 12 Nucleus               | 1H         |
| 13 Acquired Size         | 32768      |
| 14 Spectral Size         | 65536      |

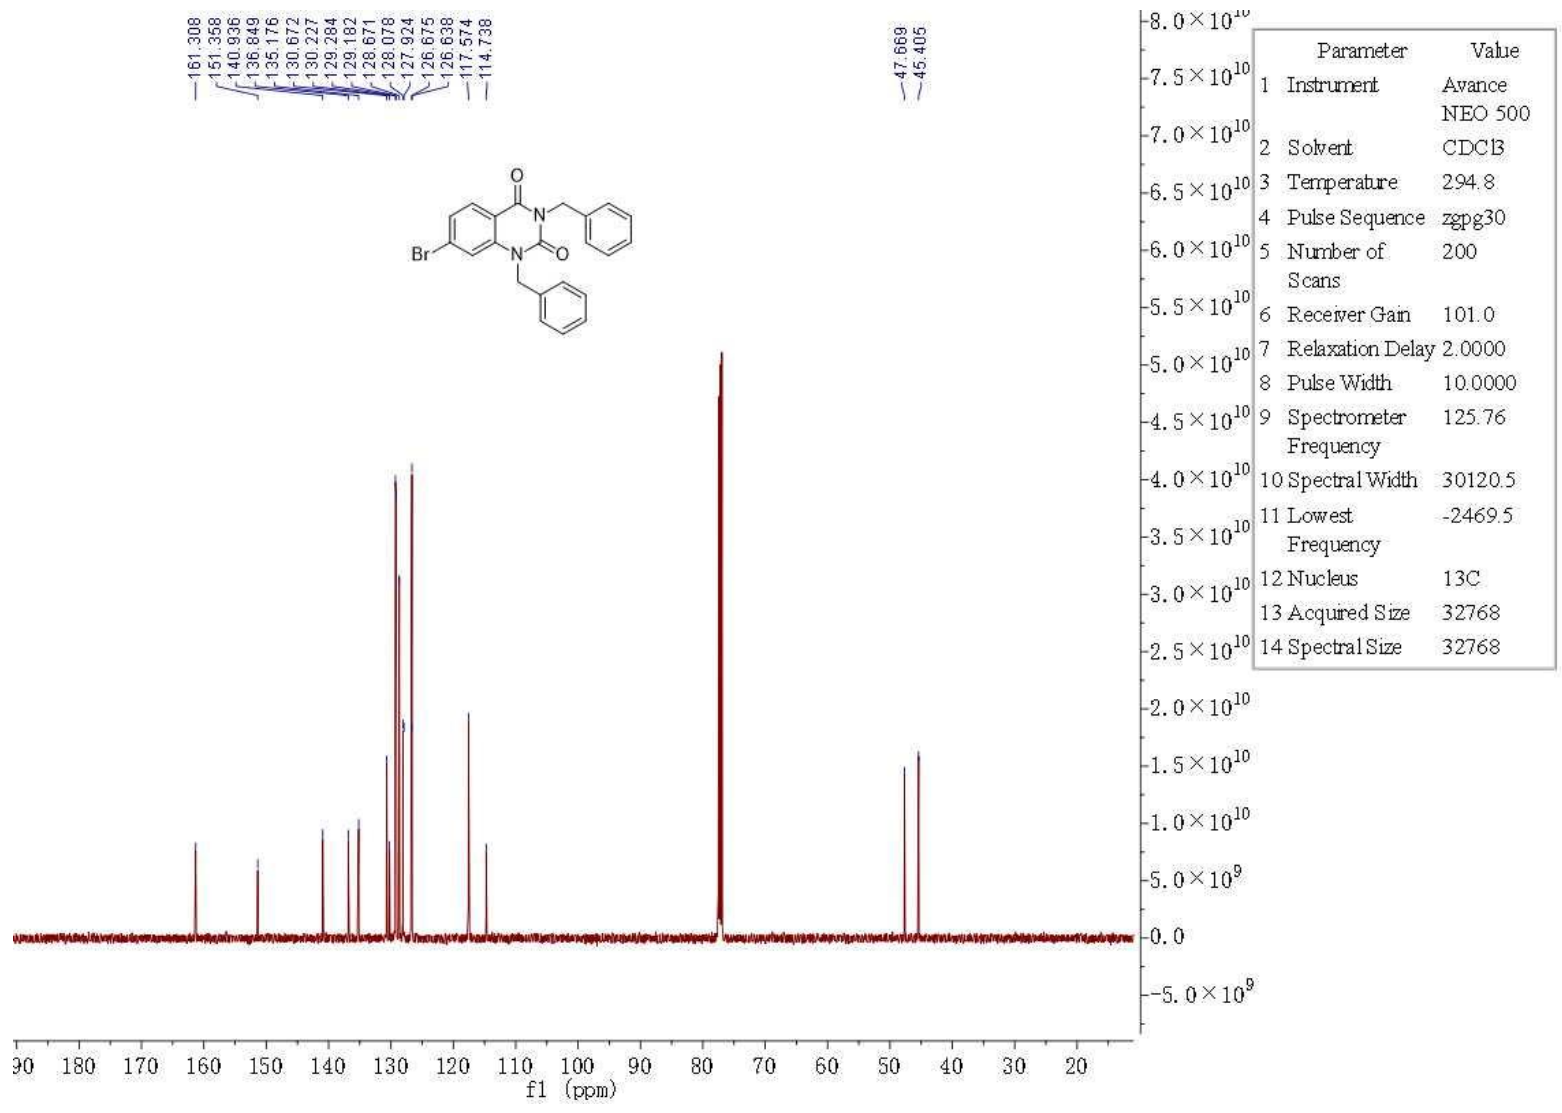

1,3-dibenzyl-6,7-dimethoxyquinazoline-2,4(1H,3H)-dione (5m)

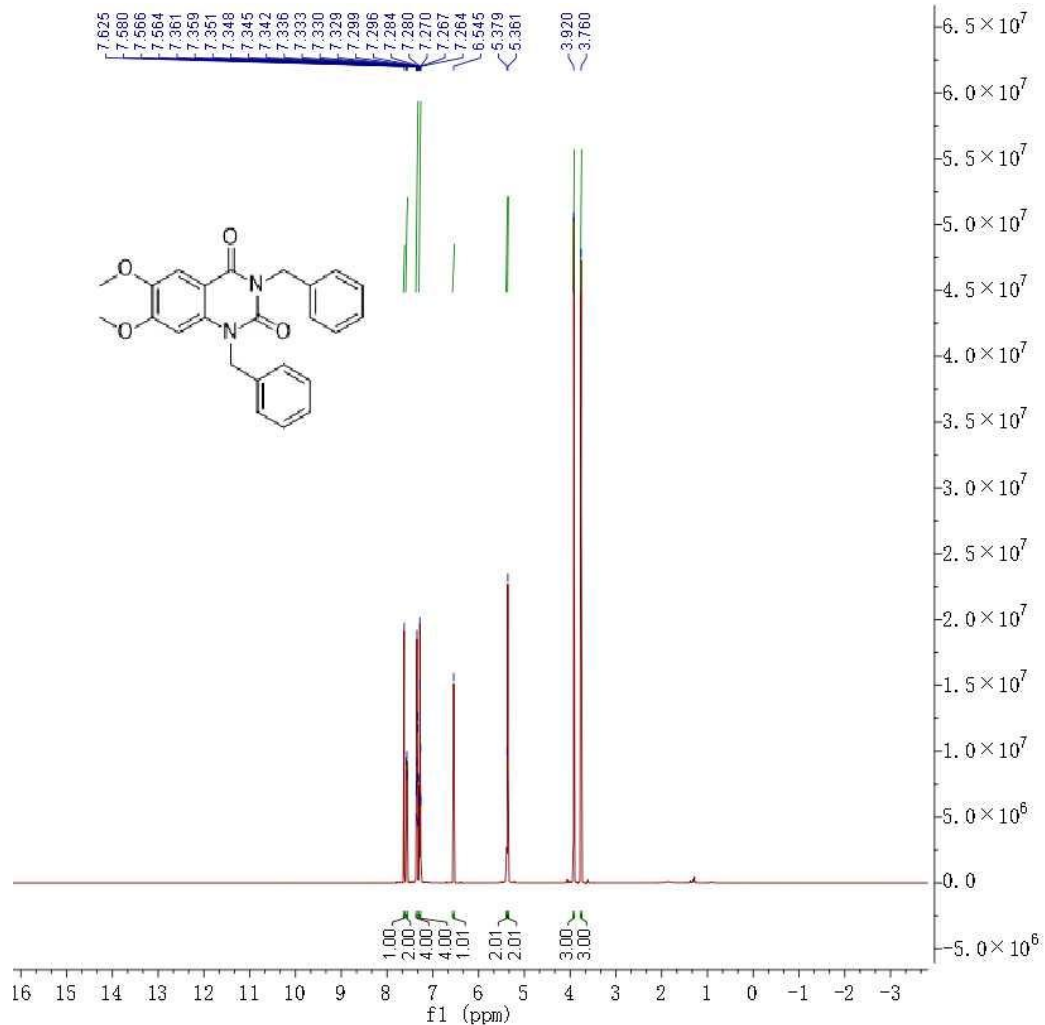

| Parameter                | Value      |
|--------------------------|------------|
| 1 Instrument             | Avance NEO |
| 2 Solvent                | CDCl3      |
| 3 Temperature            | 294.5      |
| 4 Pulse Sequence         | zg30       |
| 5 Number of Scans        | 16         |
| 6 Receiver Gain          | 69.3       |
| 7 Relaxation Delay       | 1.0000     |
| 8 Pulse Width            | 9.7200     |
| 9 Spectrometer Frequency | 500.15     |
| 10 Spectral Width        | 10000.0    |
| 11 Lowest Frequency      | -1911.6    |
| 12 Nucleus               | 1H         |
| 13 Acquired Size         | 32768      |
| 14 Spectral Size         | 65536      |

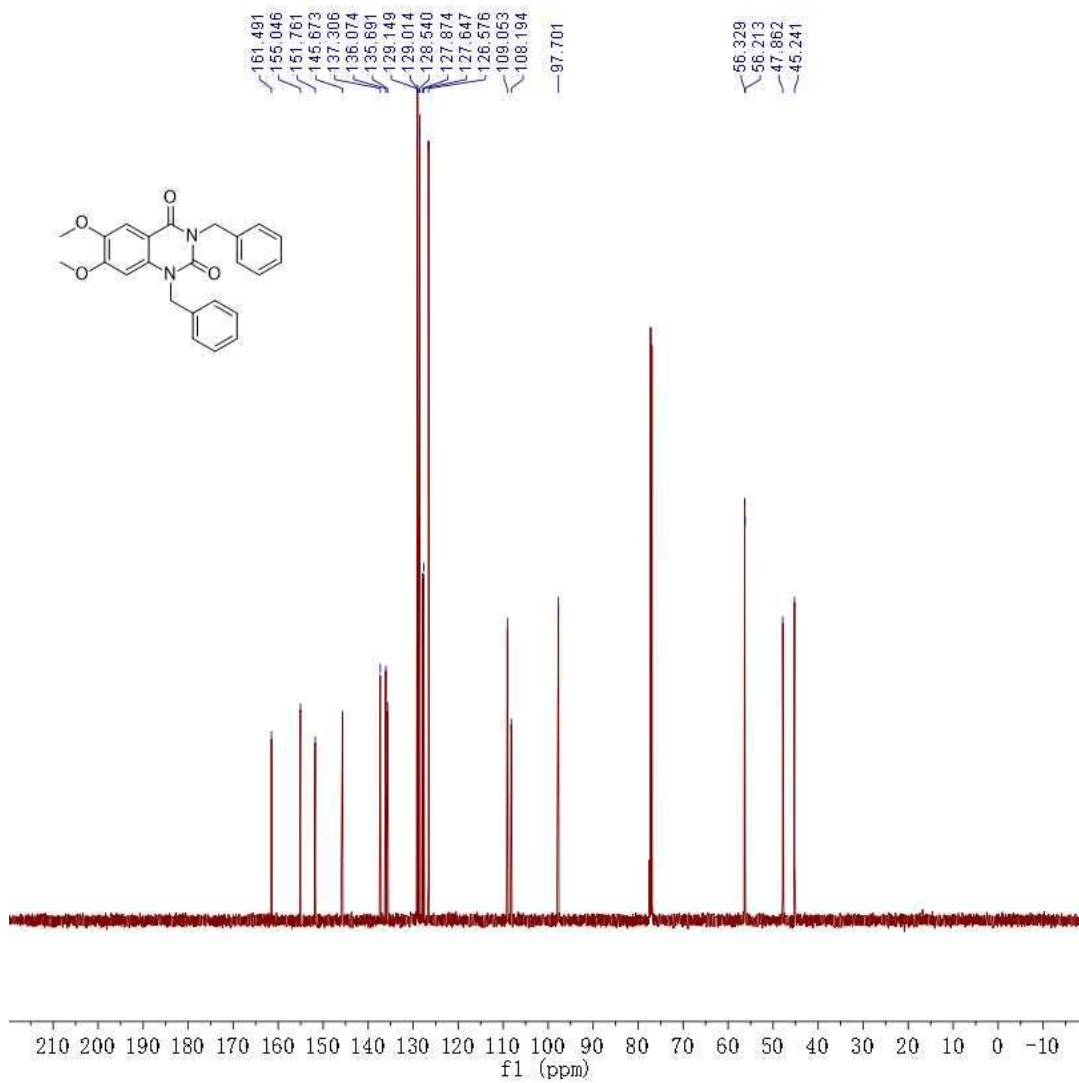

| Parameter           | Value           |
|---------------------|-----------------|
| 1 Instrument        | Avance NEO      |
| 2 Solvent           | CDCB            |
| 3 Temperature       | 294.9           |
| 4 Pulse Sequence    | zgpg30          |
| 5 Number of Scans   | 60              |
| 6 Receiver Gain     | 101.0           |
| 7 Relaxation Delay  | 2.0000          |
| 8 Pulse Width       | 10.0000         |
| 9 Spectrometer      | 125.78          |
| Frequency           |                 |
| 10 Spectral Width   | 30120.5         |
| 11 Lowest Frequency | -2476.0         |
| 12 Nucleus          | <sup>13</sup> C |
| 13 Acquired Size    | 32768           |
| 14 Spectral Size    | 65536           |



1,3-dibenzyl-6-bromo-7-chloroquinazoline-2,4(1H,3H)-dione (5n)

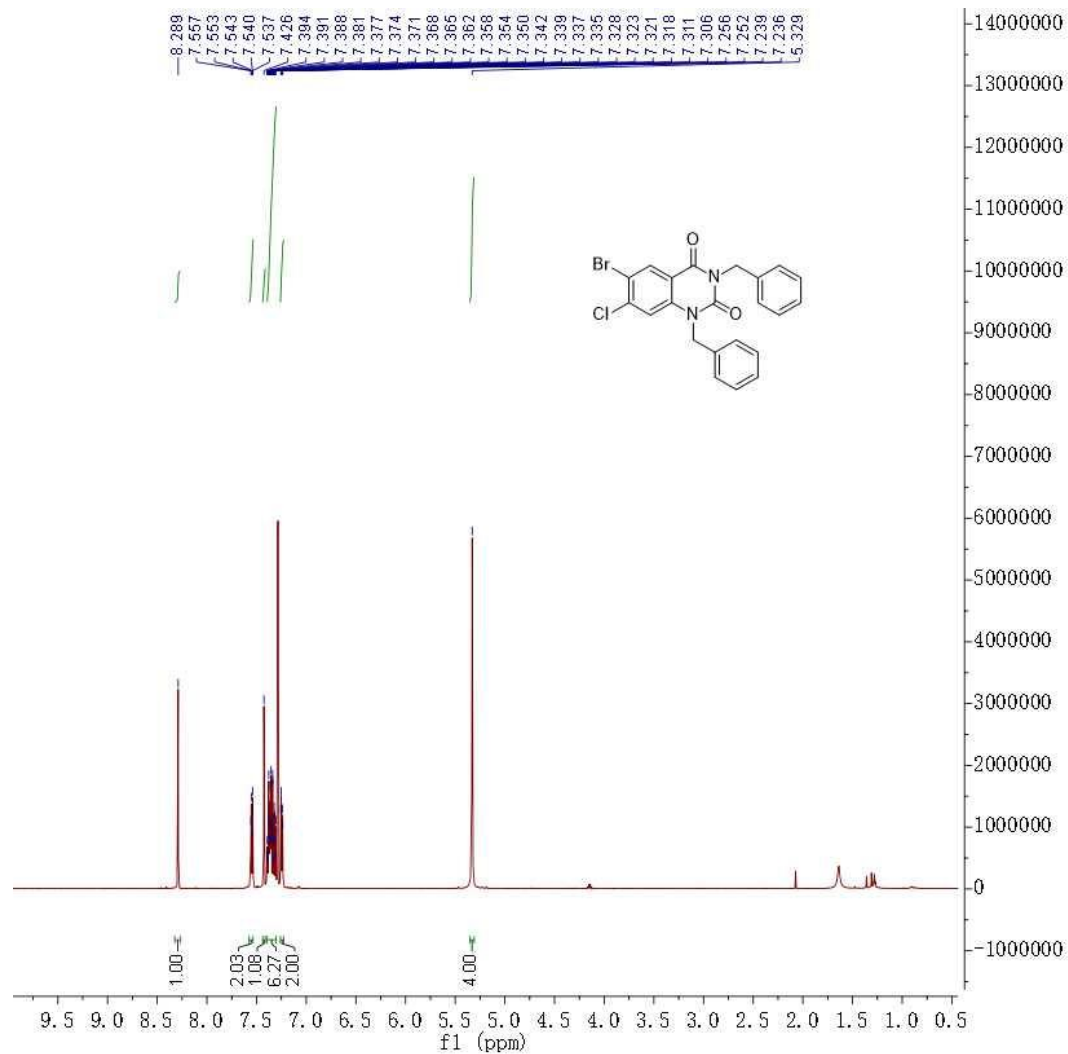

| Parameter           | Value      |
|---------------------|------------|
| 1 Instrument        | Avance NEO |
| 2 Solvent           | CDCl3      |
| 3 Temperature       | 294.8      |
| 4 Pulse Sequence    | zg30       |
| 5 Number of Scans   | 16         |
| 6 Receiver Gain     | 101.0      |
| 7 Relaxation Delay  | 1.0000     |
| 8 Pulse Width       | 9.7200     |
| 9 Spectrometer      | 500.15     |
| Frequency           |            |
| 10 Spectral Width   | 10000.0    |
| 11 Lowest Frequency | -1911.6    |
| 12 Nucleus          | 1H         |
| 13 Acquired Size    | 32768      |
| 14 Spectral Size    | 65536      |

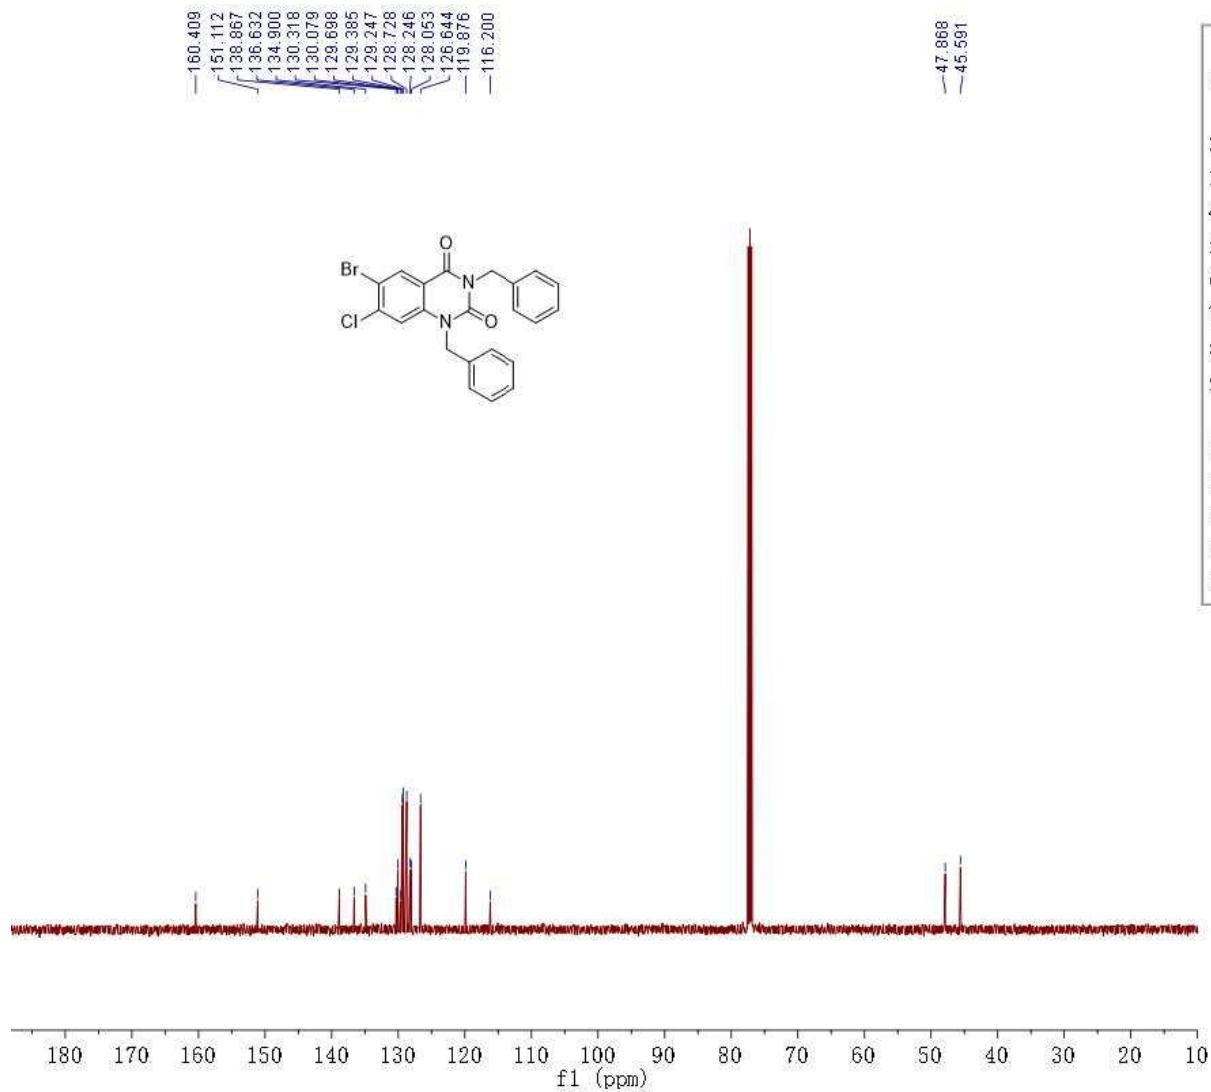

| Parameter           | Value          |
|---------------------|----------------|
| 1 Instrument        | Avance NEO 500 |
| 2 Solvent           | CDCl3          |
| 3 Temperature       | 295.2          |
| 4 Pulse Sequence    | zgpg30         |
| 5 Number of Scans   | 200            |
| 6 Receiver Gain     | 101.0          |
| 7 Relaxation Delay  | 2.0000         |
| 8 Pulse Width       | 10.0000        |
| 9 Spectrometer      | 125.78         |
| Frequency           |                |
| 10 Spectral Width   | 30120.5        |
| 11 Lowest Frequency | -2464.2        |
| 12 Nucleus          | 13C            |
| 13 Acquired Size    | 32768          |
| 14 Spectral Size    | 65536          |

### 1,3-dibenzyl-6,8-difluoroquinazoline-2,4(1H,3H)-dione (5o)

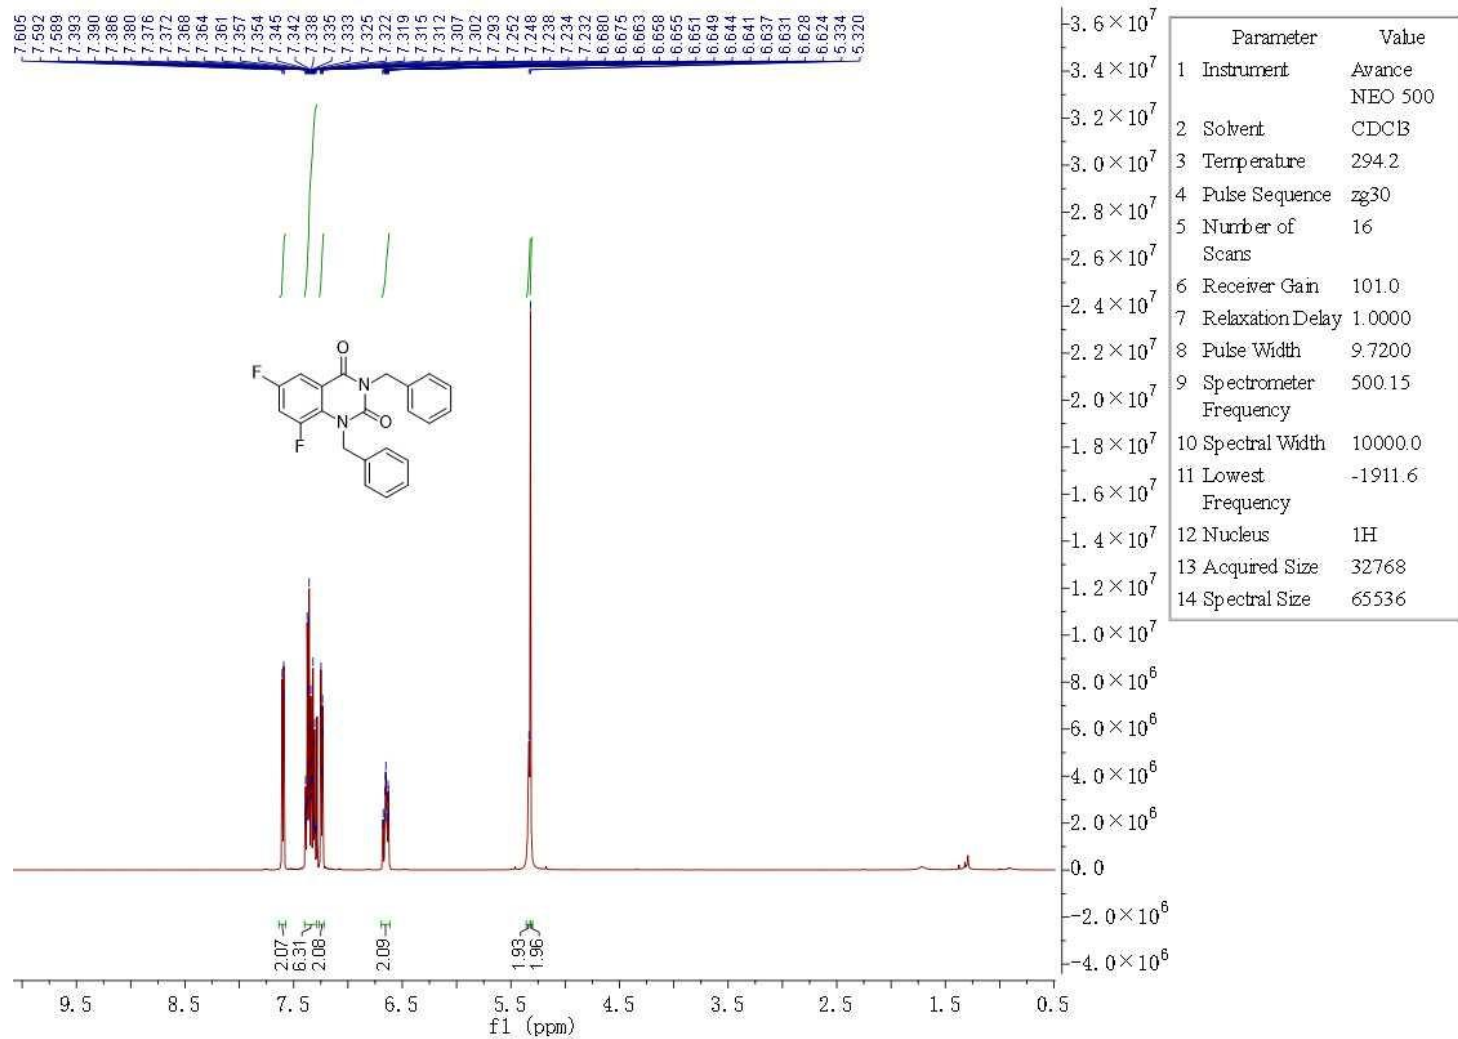

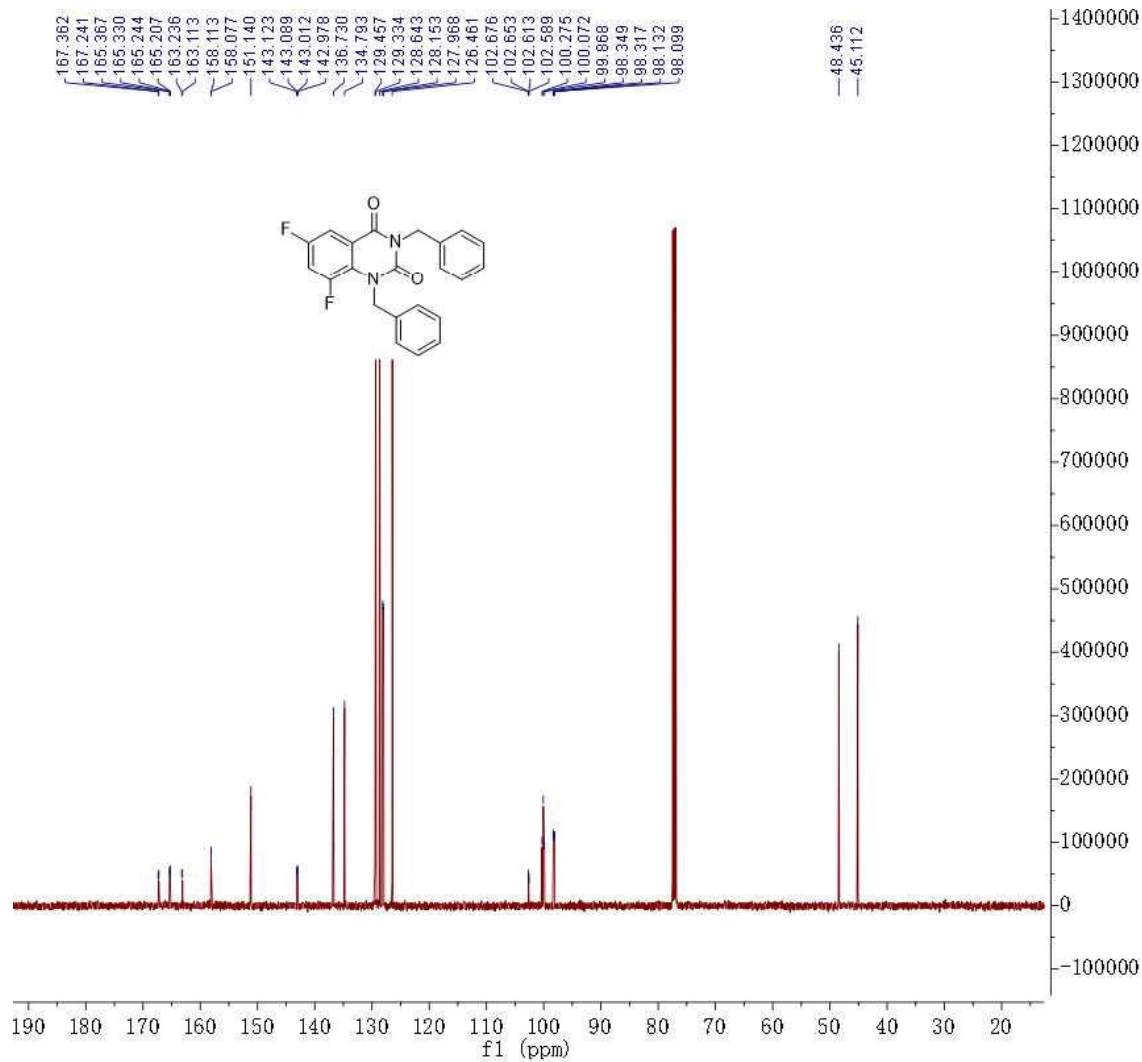

| Parameter                | Value           |
|--------------------------|-----------------|
| 1 Instrument             | Avance NEO      |
| 2 Solvent                | CDCB            |
| 3 Temperature            | 294.7           |
| 4 Pulse Sequence         | zgpg30          |
| 5 Number of Scans        | 200             |
| 6 Receiver Gain          | 101.0           |
| 7 Relaxation Delay       | 2.0000          |
| 8 Pulse Width            | 10.0000         |
| 9 Spectrometer Frequency | 125.78          |
| 10 Spectral Width        | 30120.5         |
| 11 Lowest Frequency      | -2469.9         |
| 12 Nucleus               | <sup>13</sup> C |
| 13 Acquired Size         | 32768           |
| 14 Spectral Size         | 65536           |

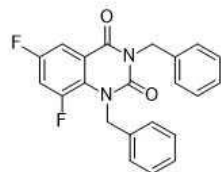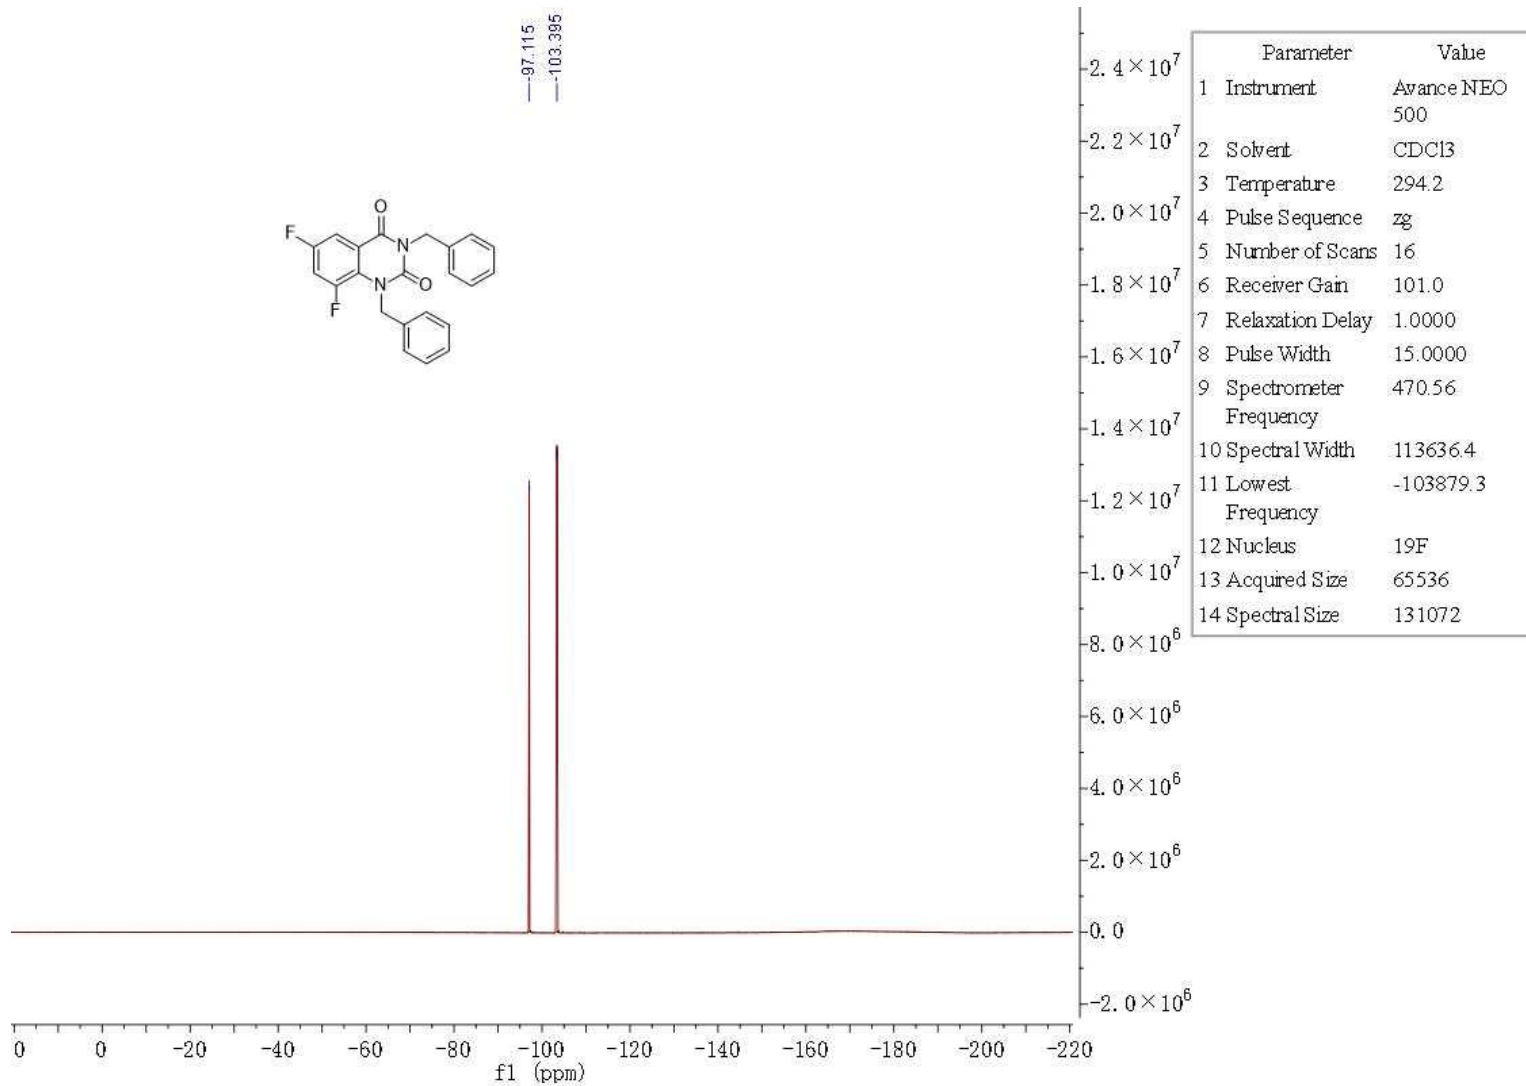

**1,3-dibenzyl-6-(benzyloxy)quinazoline-2,4(1H,3H)-dione (5p)**

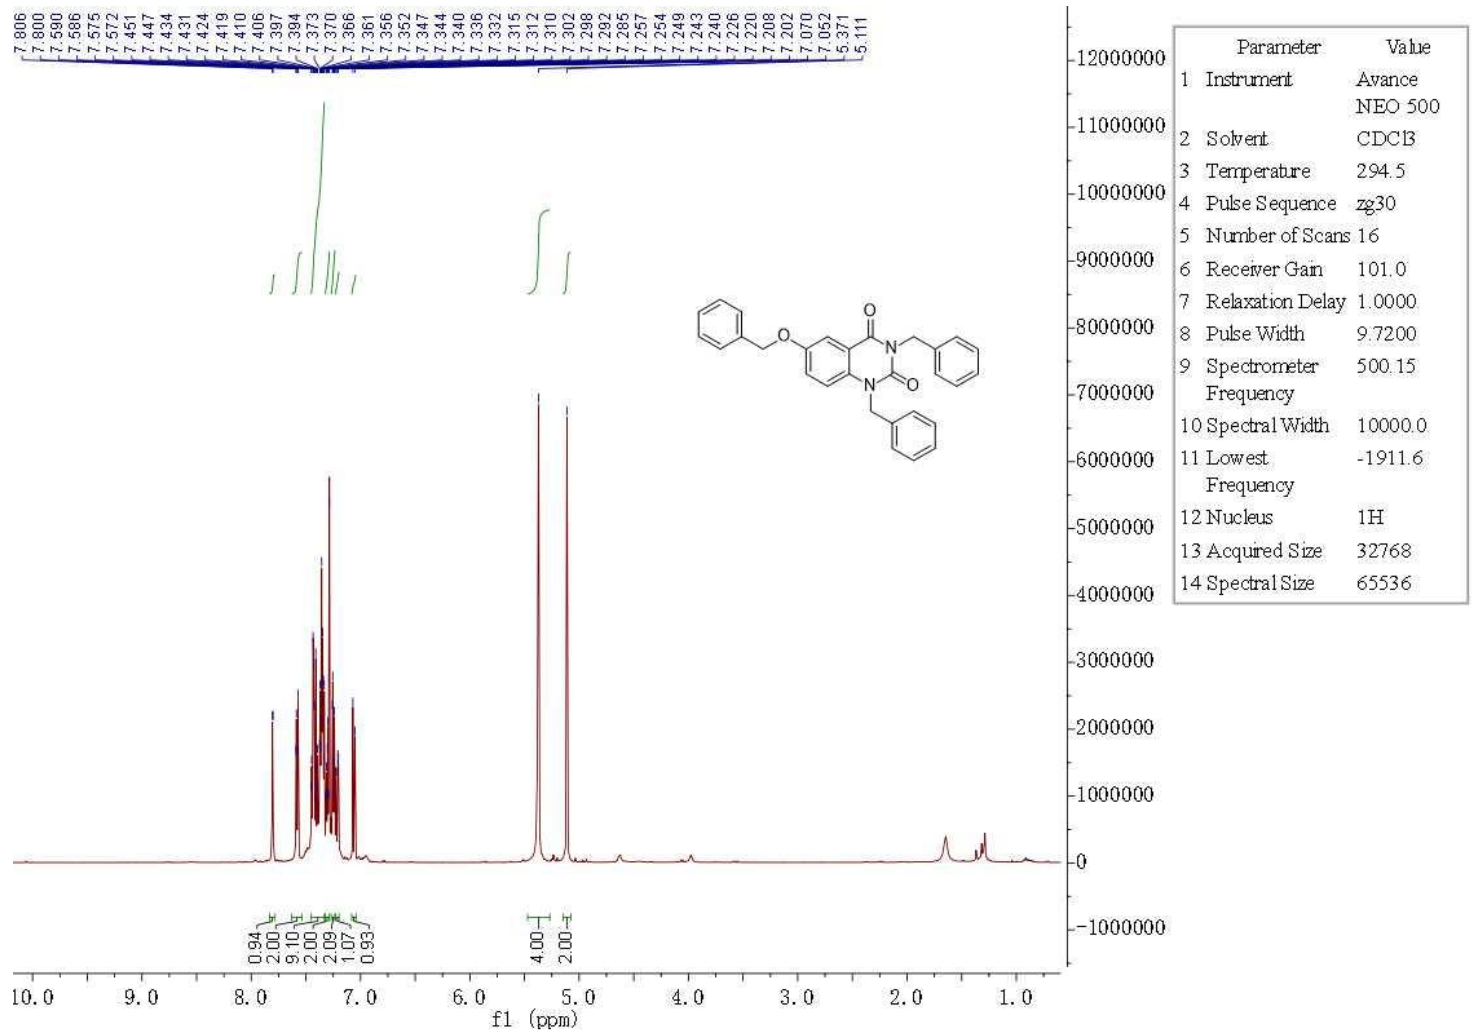

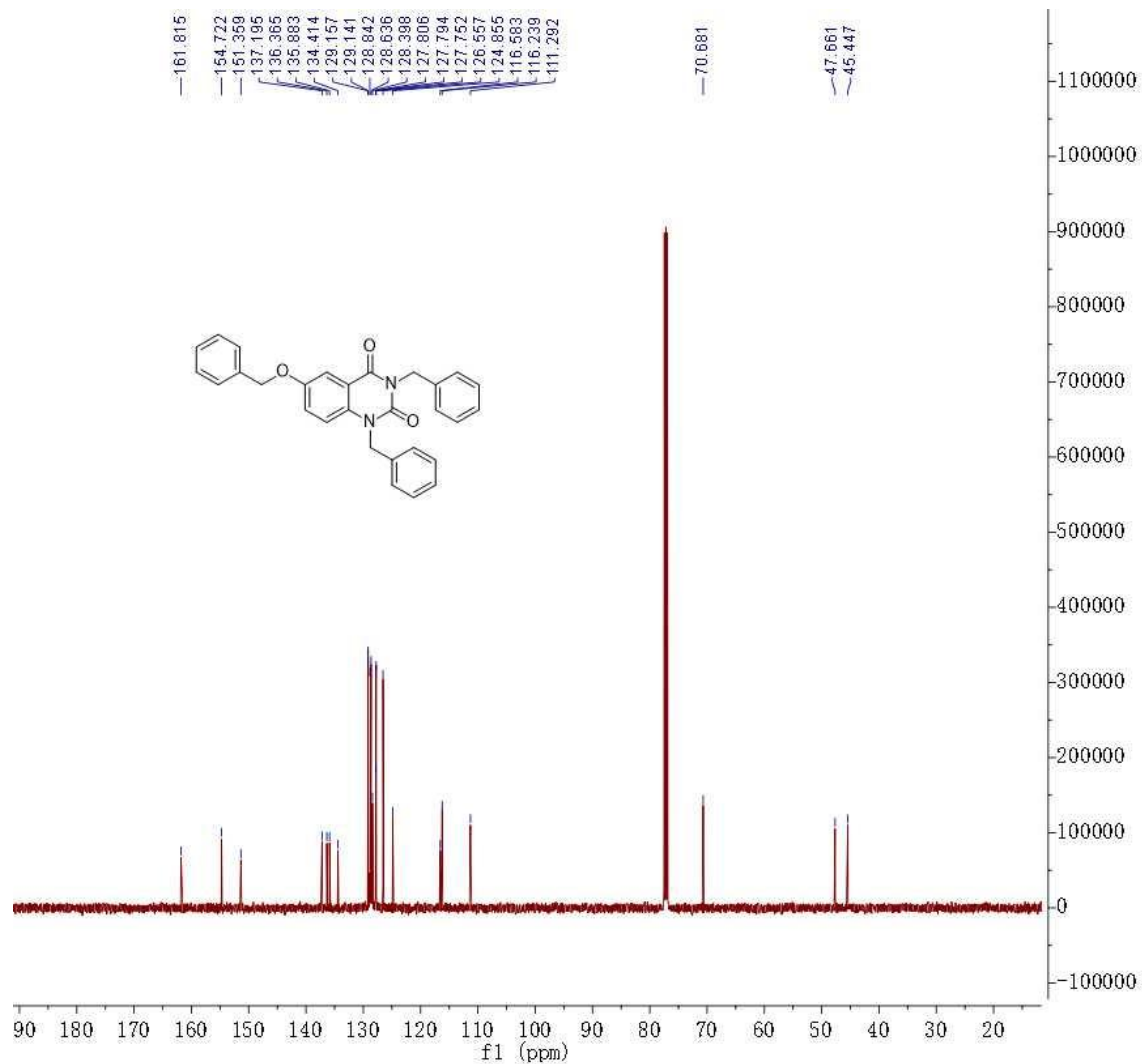

| Parameter                | Value      |
|--------------------------|------------|
| 1 Instrument             | Avance NEO |
| 2 Solvent                | CDCl3      |
| 3 Temperature            | 295.2      |
| 4 Pulse Sequence         | zgpg30     |
| 5 Number of Scans        | 200        |
| 6 Receiver Gain          | 101.0      |
| 7 Relaxation Delay       | 2.0000     |
| 8 Pulse Width            | 10.0000    |
| 9 Spectrometer Frequency | 125.78     |
| 10 Spectral Width        | 30120.5    |
| 11 Lowest Frequency      | -2466.6    |
| 12 Nucleus               | 13C        |
| 13 Acquired Size         | 32768      |
| 14 Spectral Size         | 65536      |

**1-benzyl-3-methylquinazoline-2,4(1H,3H)-dione (5q)**

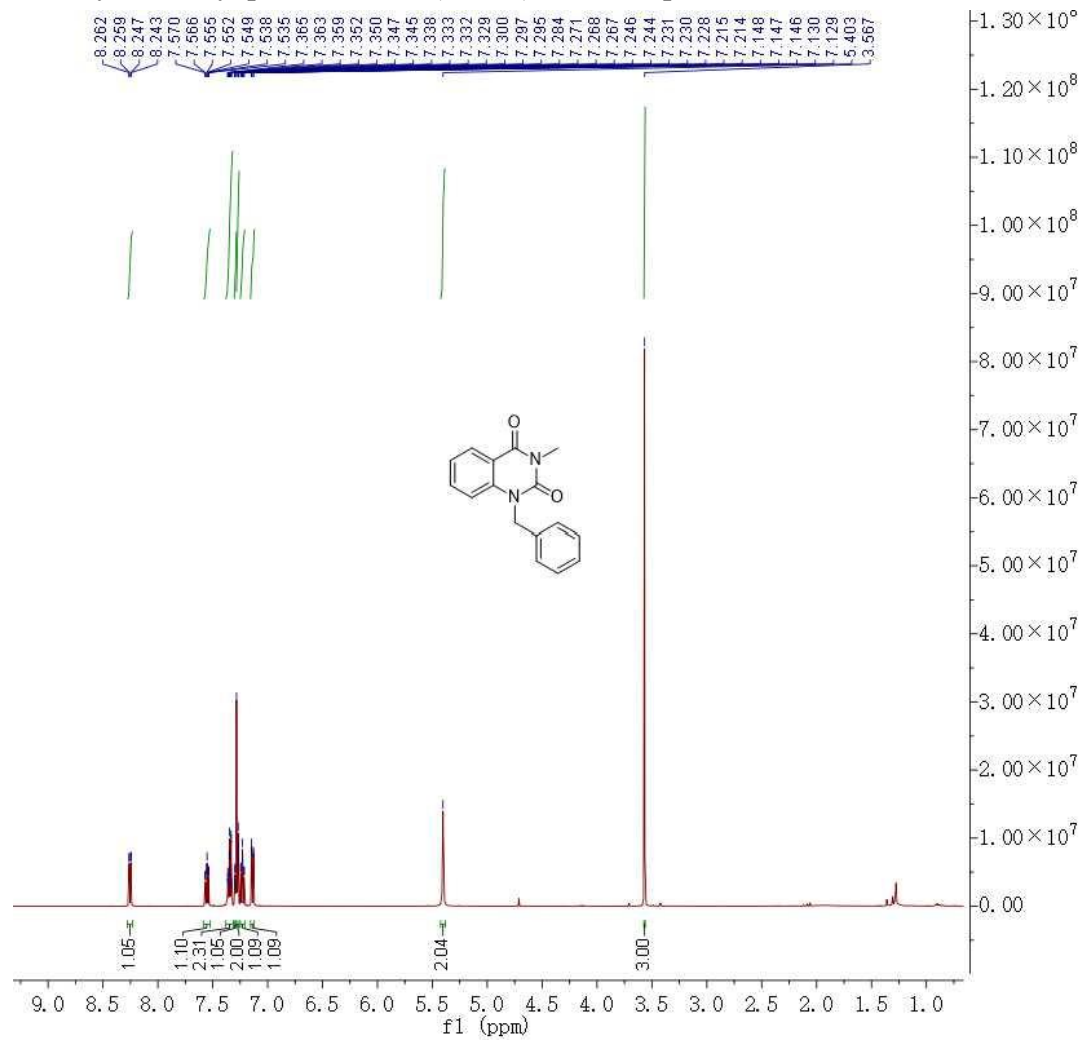

| Parameter           | Value      |
|---------------------|------------|
| 1 Instrument        | Avance NEO |
| 2 Solvent           | CDCl3      |
| 3 Temperature       | 296.2      |
| 4 Pulse Sequence    | zg30       |
| 5 Number of Scans   | 16         |
| 6 Receiver Gain     | 86.7       |
| 7 Relaxation Delay  | 1.0000     |
| 8 Pulse Width       | 9.7200     |
| 9 Spectrometer      | 500.15     |
| Frequency           |            |
| 10 Spectral Width   | 10000.0    |
| 11 Lowest Frequency | -1911.6    |
| 12 Nucleus          | 1H         |
| 13 Acquired Size    | 32768      |
| 14 Spectral Size    | 65536      |



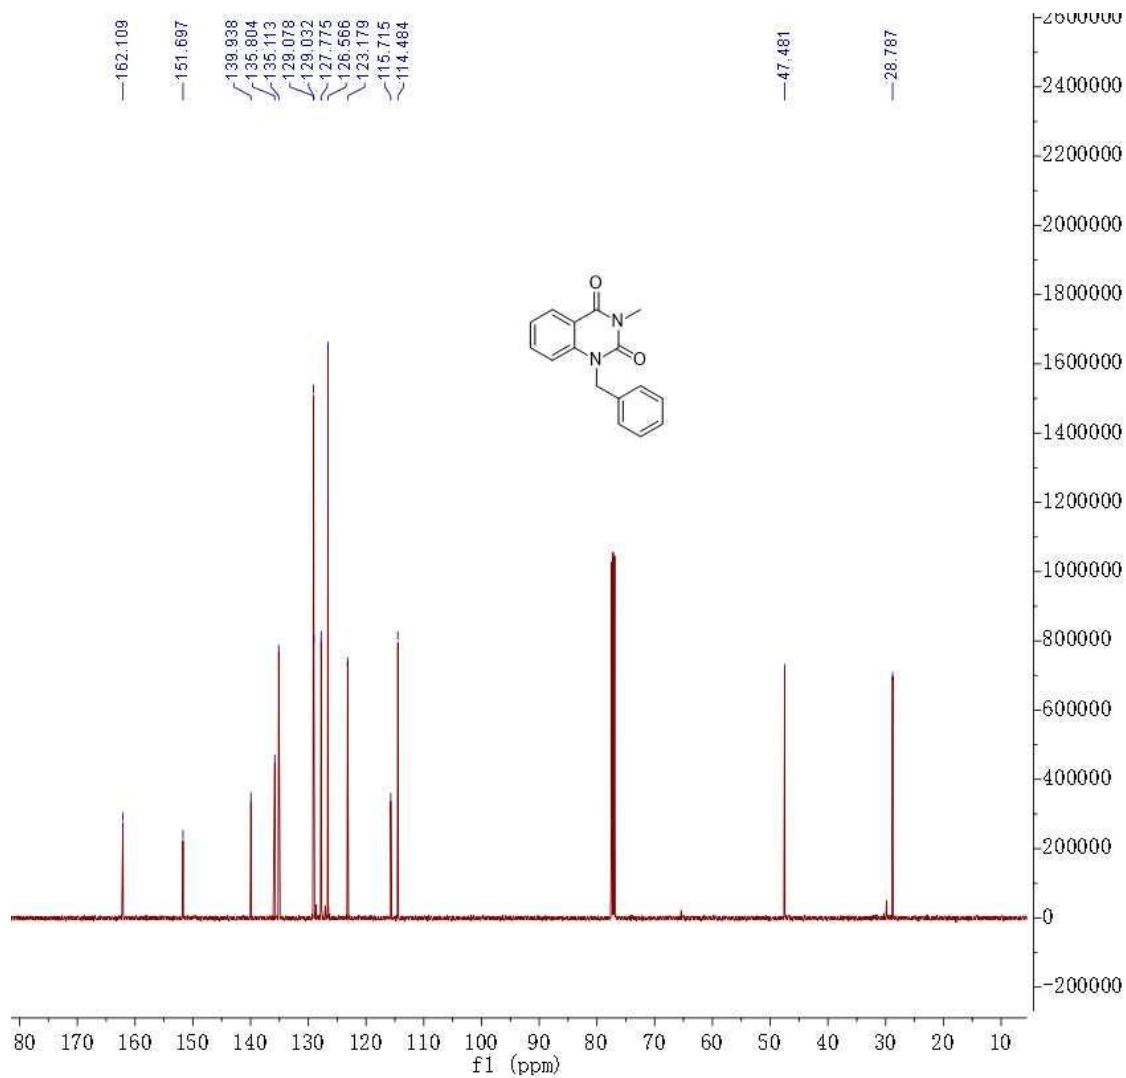

| Parameter           | Value      |
|---------------------|------------|
| 1 Instrument        | Avance NEO |
| 2 Solvent           | CDCl3      |
| 3 Temperature       | 296.1      |
| 4 Pulse Sequence    | zgpg30     |
| 5 Number of Scans   | 200        |
| 6 Receiver Gain     | 101.0      |
| 7 Relaxation Delay  | 2.0000     |
| 8 Pulse Width       | 10.0000    |
| 9 Spectrometer      | 125.78     |
| Frequency           |            |
| 10 Spectral Width   | 30120.5    |
| 11 Lowest Frequency | -2471.9    |
| 12 Nucleus          | 13C        |
| 13 Acquired Size    | 32768      |
| 14 Spectral Size    | 65536      |

3-benzylbenzo[d]thiazol-2(3H)-one (7a)

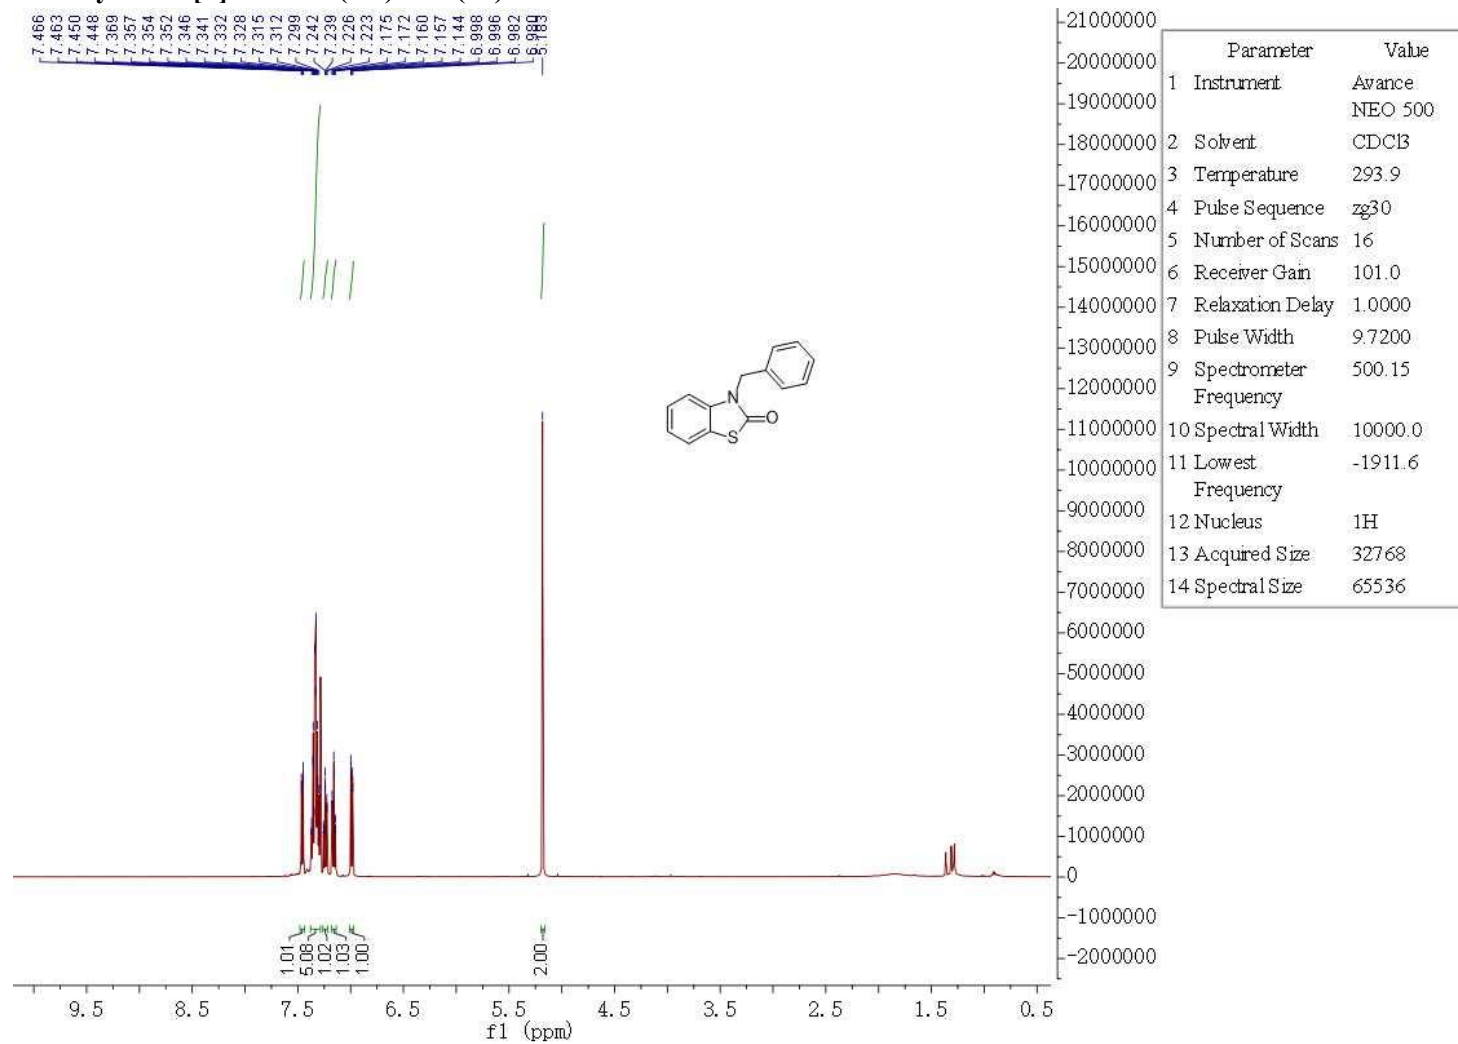

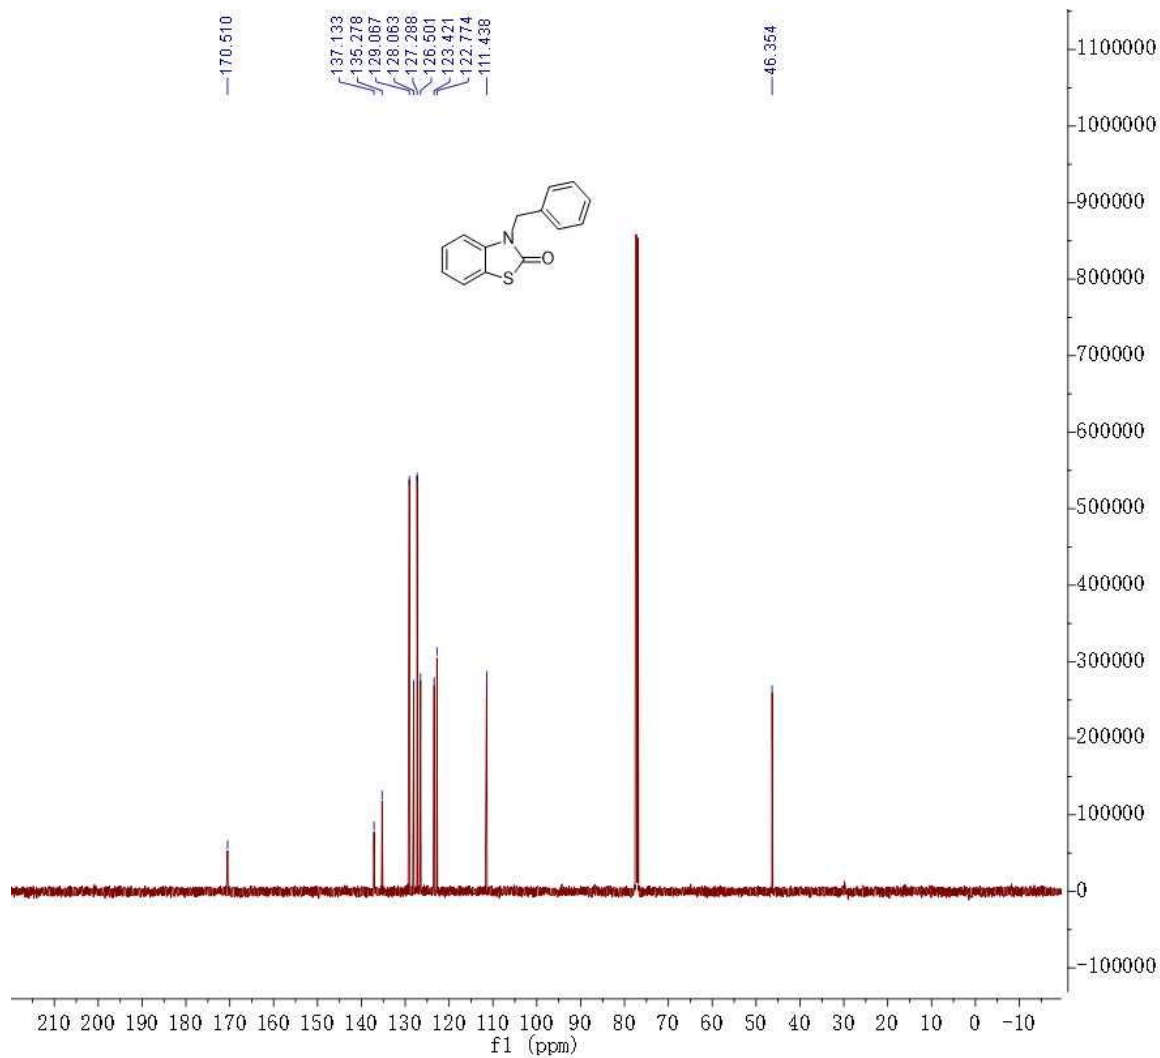

| Parameter                   | Value             |
|-----------------------------|-------------------|
| 1 Instrument                | Avance<br>NEO 500 |
| 2 Solvent                   | CDCl3             |
| 3 Temperature               | 294.8             |
| 4 Pulse Sequence            | zgpg30            |
| 5 Number of Scans           | 200               |
| 6 Receiver Gain             | 101.0             |
| 7 Relaxation Delay          | 2.0000            |
| 8 Pulse Width               | 10.0000           |
| 9 Spectrometer<br>Frequency | 125.78            |
| 10 Spectral Width           | 30120.5           |
| 11 Lowest<br>Frequency      | -2466.6           |
| 12 Nucleus                  | 13C               |
| 13 Acquired Size            | 32768             |
| 14 Spectral Size            | 65536             |

**3-benzyl-6-bromobenzo[d]thiazol-2(3H)-one (7b)**

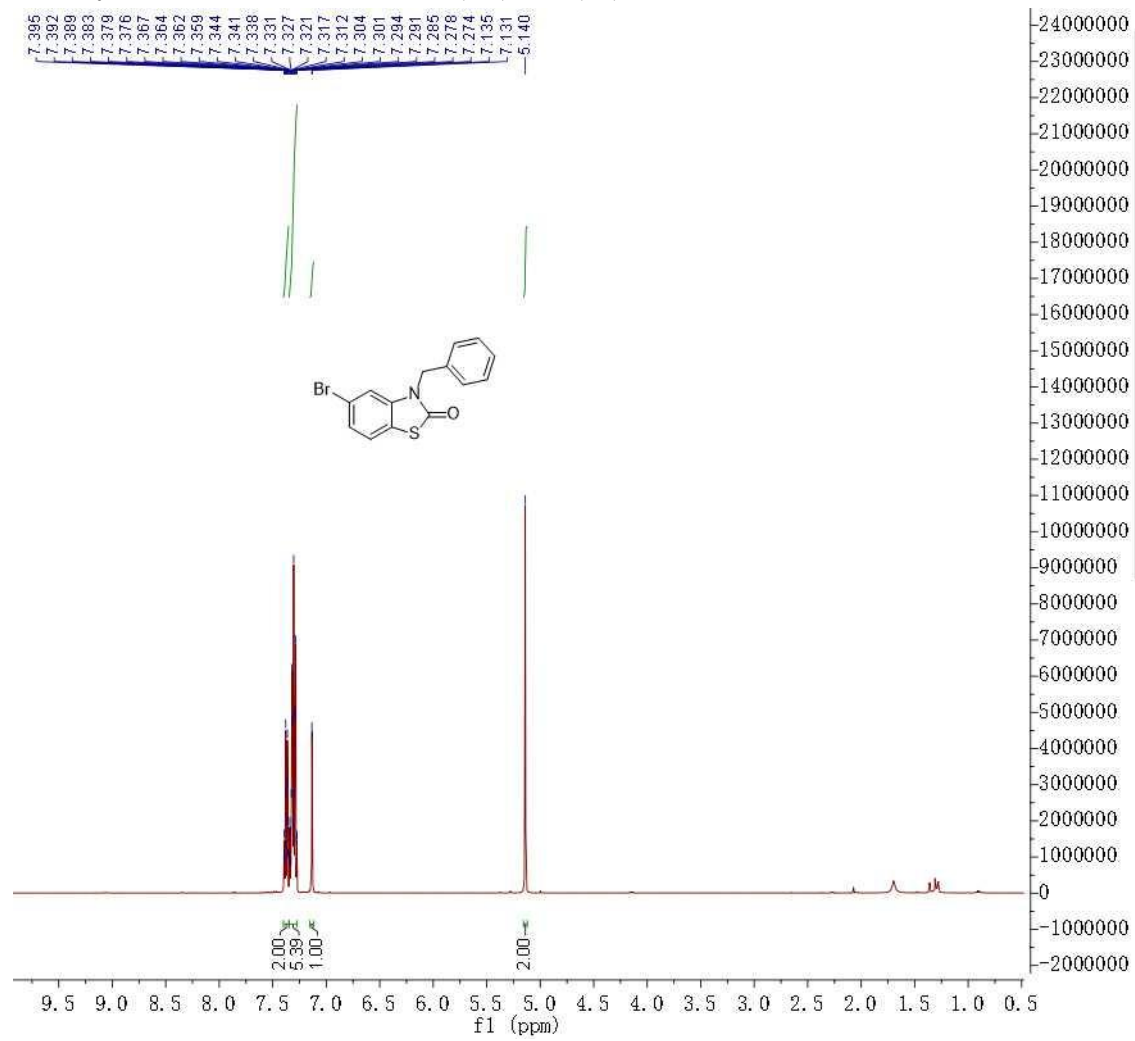

| Parameter                | Value      |
|--------------------------|------------|
| 1 Instrument             | Avance NEO |
| 2 Solvent                | CDCl3      |
| 3 Temperature            | 294.5      |
| 4 Pulse Sequence         | zg30       |
| 5 Number of Scans        | 16         |
| 6 Receiver Gain          | 101.0      |
| 7 Relaxation Delay       | 1.0000     |
| 8 Pulse Width            | 9.7200     |
| 9 Spectrometer Frequency | 500.15     |
| 10 Spectral Width        | 10000.0    |
| 11 Lowest Frequency      | -1911.6    |
| 12 Nucleus               | 1H         |
| 13 Acquired Size         | 32768      |
| 14 Spectral Size         | 65536      |

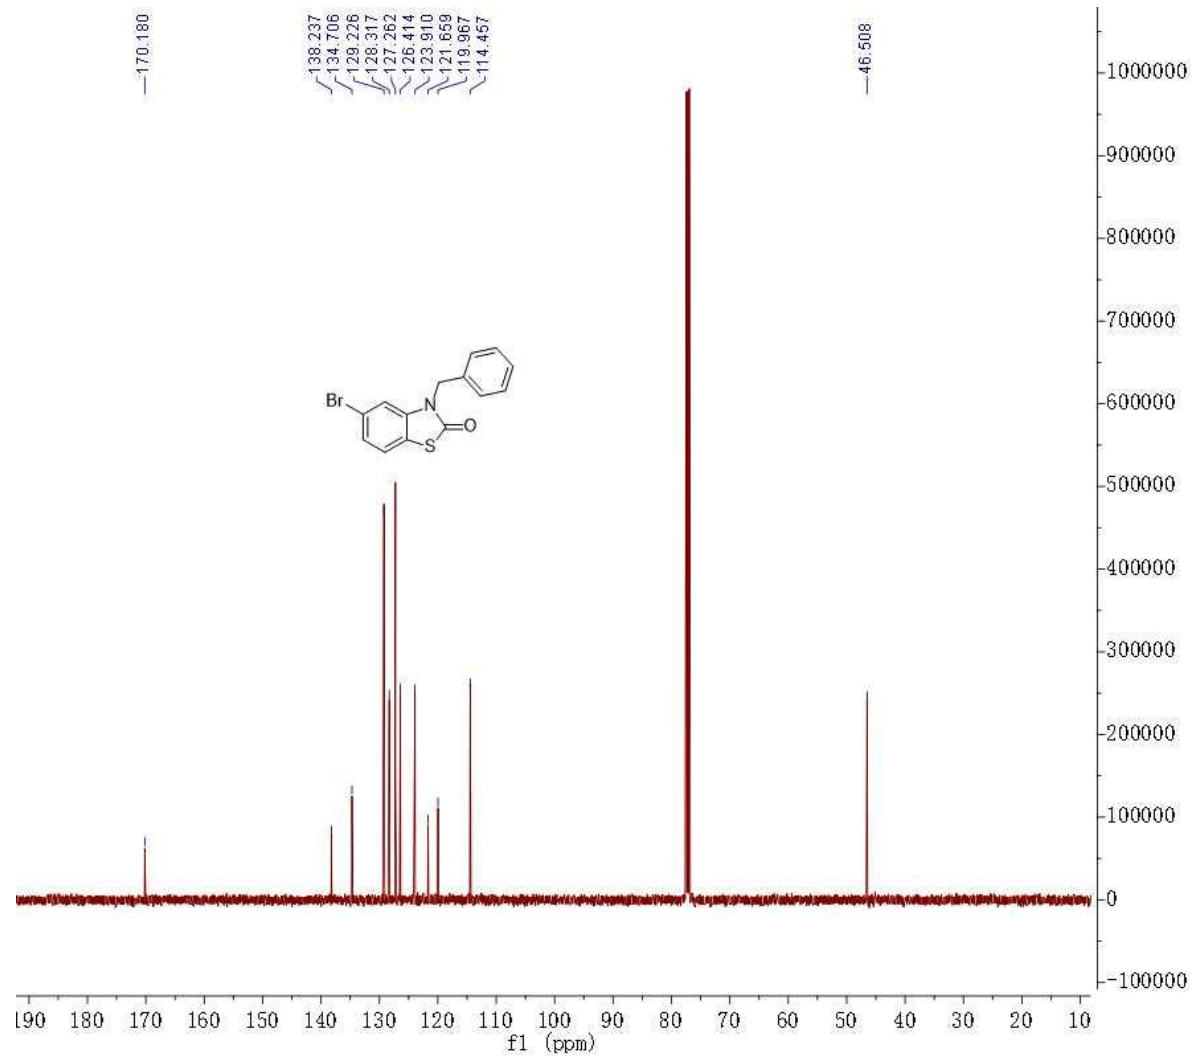

| Parameter                   | Value             |
|-----------------------------|-------------------|
| 1 Instrument                | Avance<br>NEO 500 |
| 2 Solvent                   | CDCl <sub>3</sub> |
| 3 Temperature               | 295.1             |
| 4 Pulse Sequence            | zgpg30            |
| 5 Number of Scans           | 200               |
| 6 Receiver Gain             | 101.0             |
| 7 Relaxation Delay          | 2.0000            |
| 8 Pulse Width               | 10.0000           |
| 9 Spectrometer<br>Frequency | 125.78            |
| 10 Spectral Width           | 30120.5           |
| 11 Lowest<br>Frequency      | -2465.7           |
| 12 Nucleus                  | <sup>13</sup> C   |
| 13 Acquired Size            | 32768             |
| 14 Spectral Size            | 65536             |

**3-benzyl-6-chlorobenzo[d]thiazol-2(3H)-one (7c)**

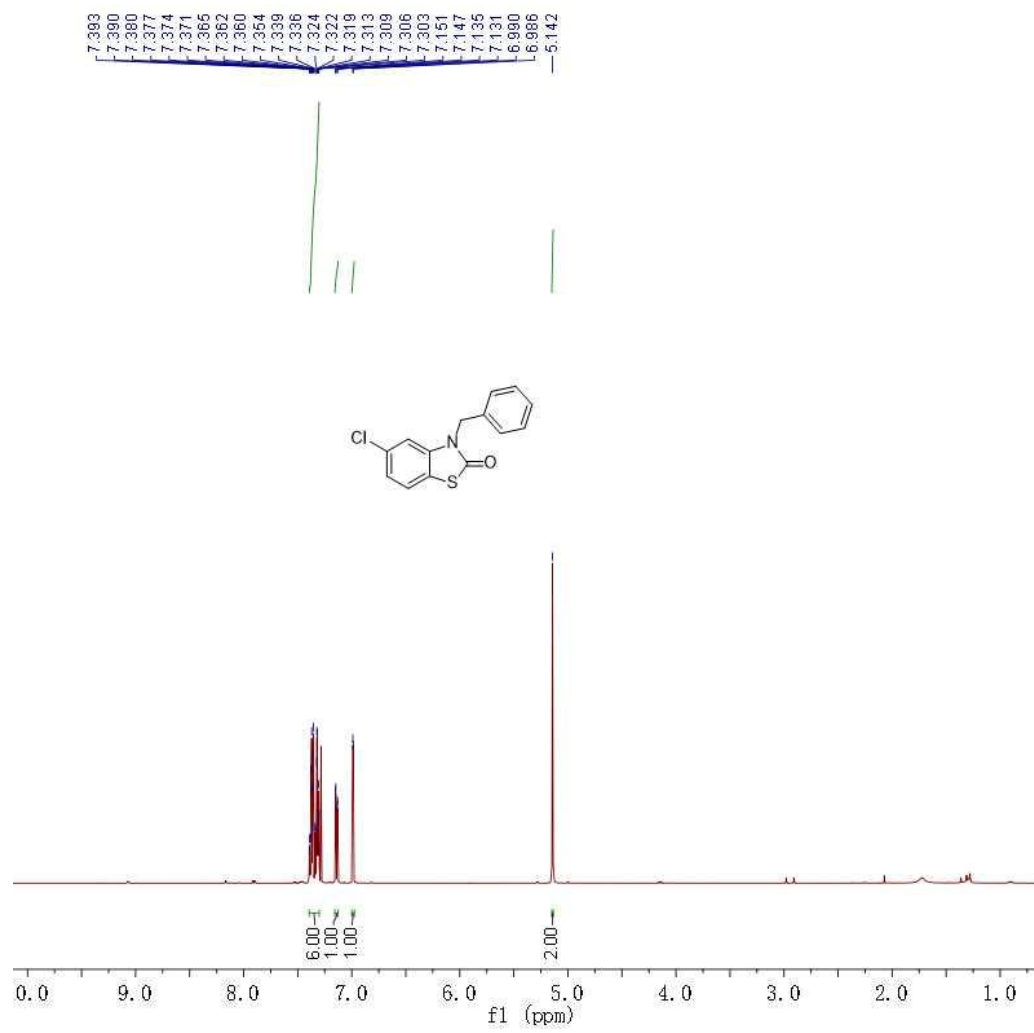

| Parameter                   | Value             |
|-----------------------------|-------------------|
| 1 Instrument                | Avance<br>NEO 500 |
| 2 Solvent                   | CDCl3             |
| 3 Temperature               | 294.4             |
| 4 Pulse Sequence            | zg30              |
| 5 Number of Scans           | 16                |
| 6 Receiver Gain             | 101.0             |
| 7 Relaxation Delay          | 1.0000            |
| 8 Pulse Width               | 9.7200            |
| 9 Spectrometer<br>Frequency | 500.15            |
| 10 Spectral Width           | 10000.0           |
| 11 Lowest<br>Frequency      | -1911.6           |
| 12 Nucleus                  | 1H                |
| 13 Acquired Size            | 32768             |
| 14 Spectral Size            | 65536             |

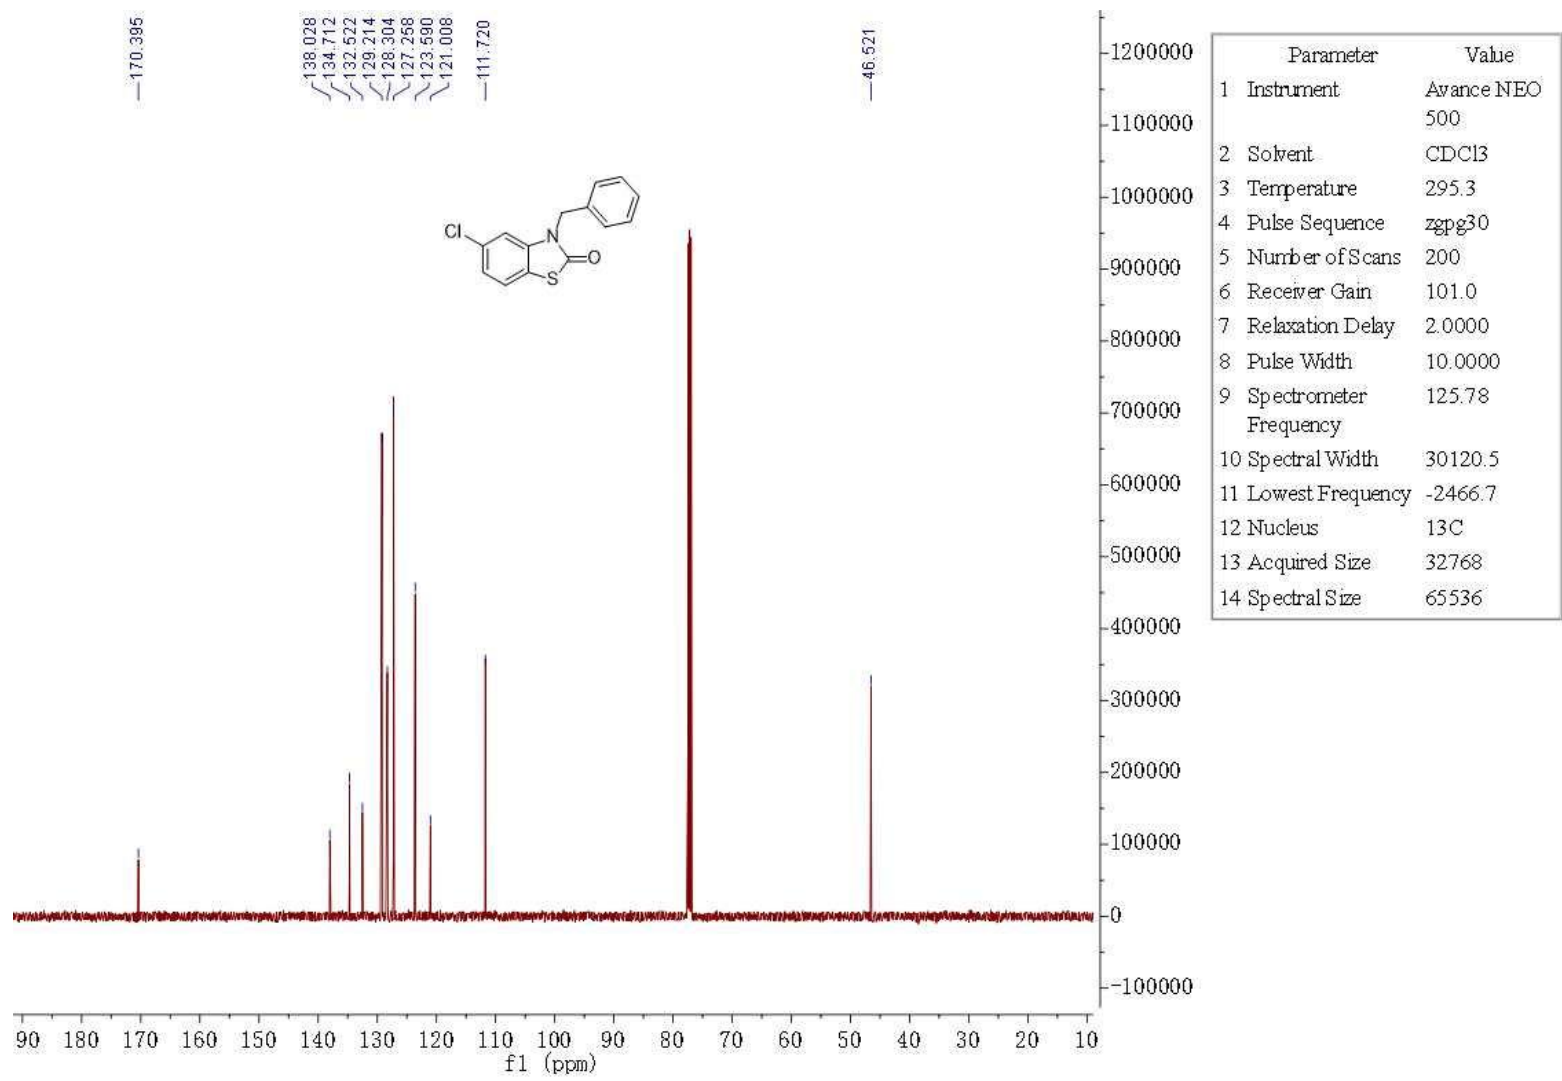

**3-benzyl-6-methoxybenzo[d]thiazol-2(3H)-one (7d)**

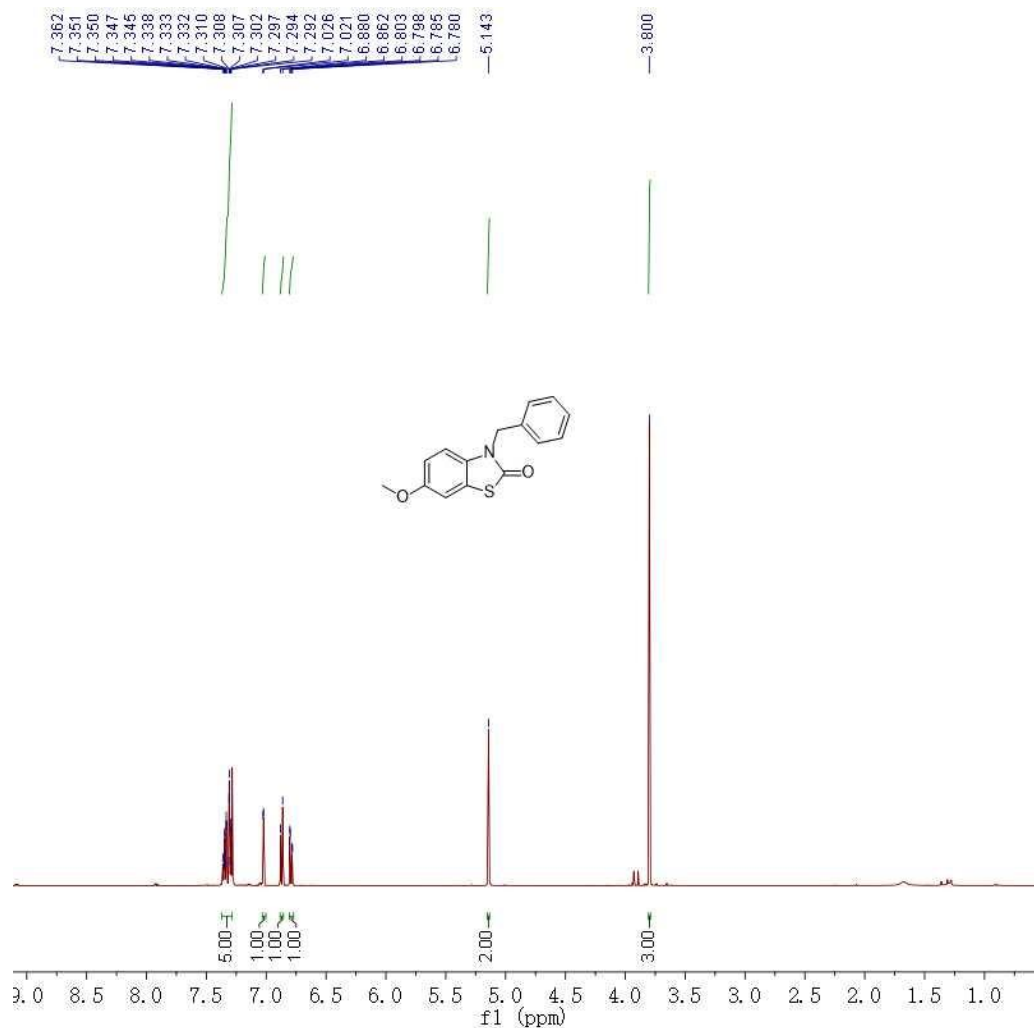

| Parameter                | Value      |
|--------------------------|------------|
| 1 Instrument             | Avance NEO |
| 2 Solvent                | CDCl3      |
| 3 Temperature            | 294.6      |
| 4 Pulse Sequence         | zg30       |
| 5 Number of Scans        | 16         |
| 6 Receiver Gain          | 101.0      |
| 7 Relaxation Delay       | 1.0000     |
| 8 Pulse Width            | 9.7200     |
| 9 Spectrometer Frequency | 500.15     |
| 10 Spectral Width        | 10000.0    |
| 11 Lowest Frequency      | -1911.6    |
| 12 Nucleus               | 1H         |
| 13 Acquired Size         | 32768      |
| 14 Spectral Size         | 65536      |



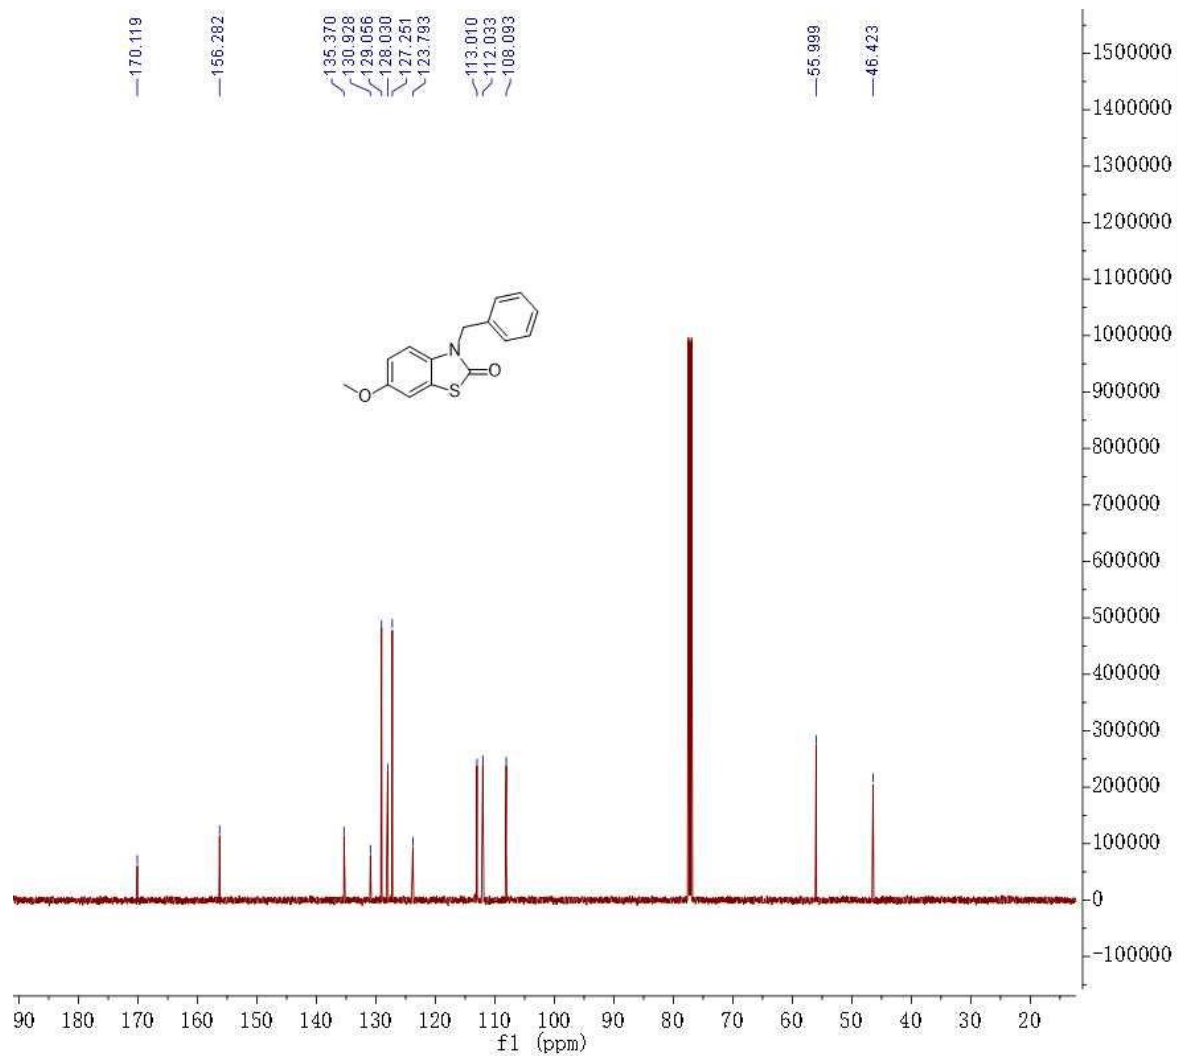

| Parameter          | Value   |
|--------------------|---------|
| 1 Instrument       | Avance  |
|                    | NEO 500 |
| 2 Solvent          | CDCl3   |
| 3 Temperature      | 295.0   |
| 4 Pulse Sequence   | zgpg30  |
| 5 Number of Scans  | 200     |
| 6 Receiver Gain    | 101.0   |
| 7 Relaxation Delay | 2.0000  |
| 8 Pulse Width      | 10.0000 |
| 9 Spectrometer     | 125.78  |
| Frequency          |         |
| 10 Spectral Width  | 30120.5 |
| 11 Lowest          | -2465.7 |
| Frequency          |         |
| 12 Nucleus         | 13C     |
| 13 Acquired Size   | 32768   |
| 14 Spectral Size   | 65536   |

1-benzyl-3-methyl-1,3-dihydro-2H-benzo[d]imidazol-2-one (7e)

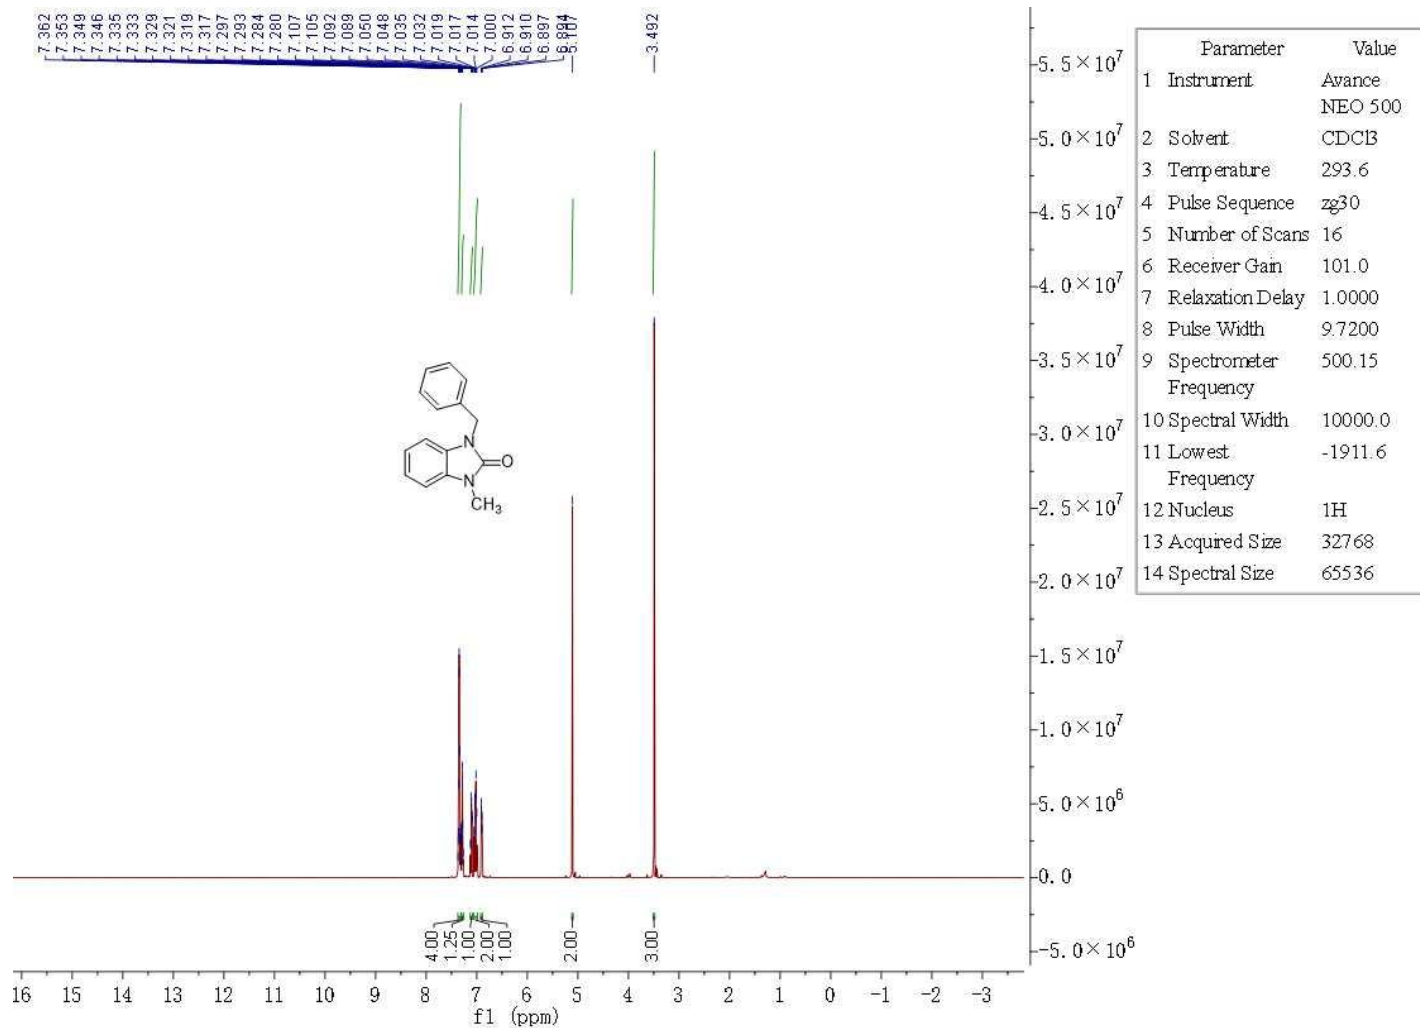

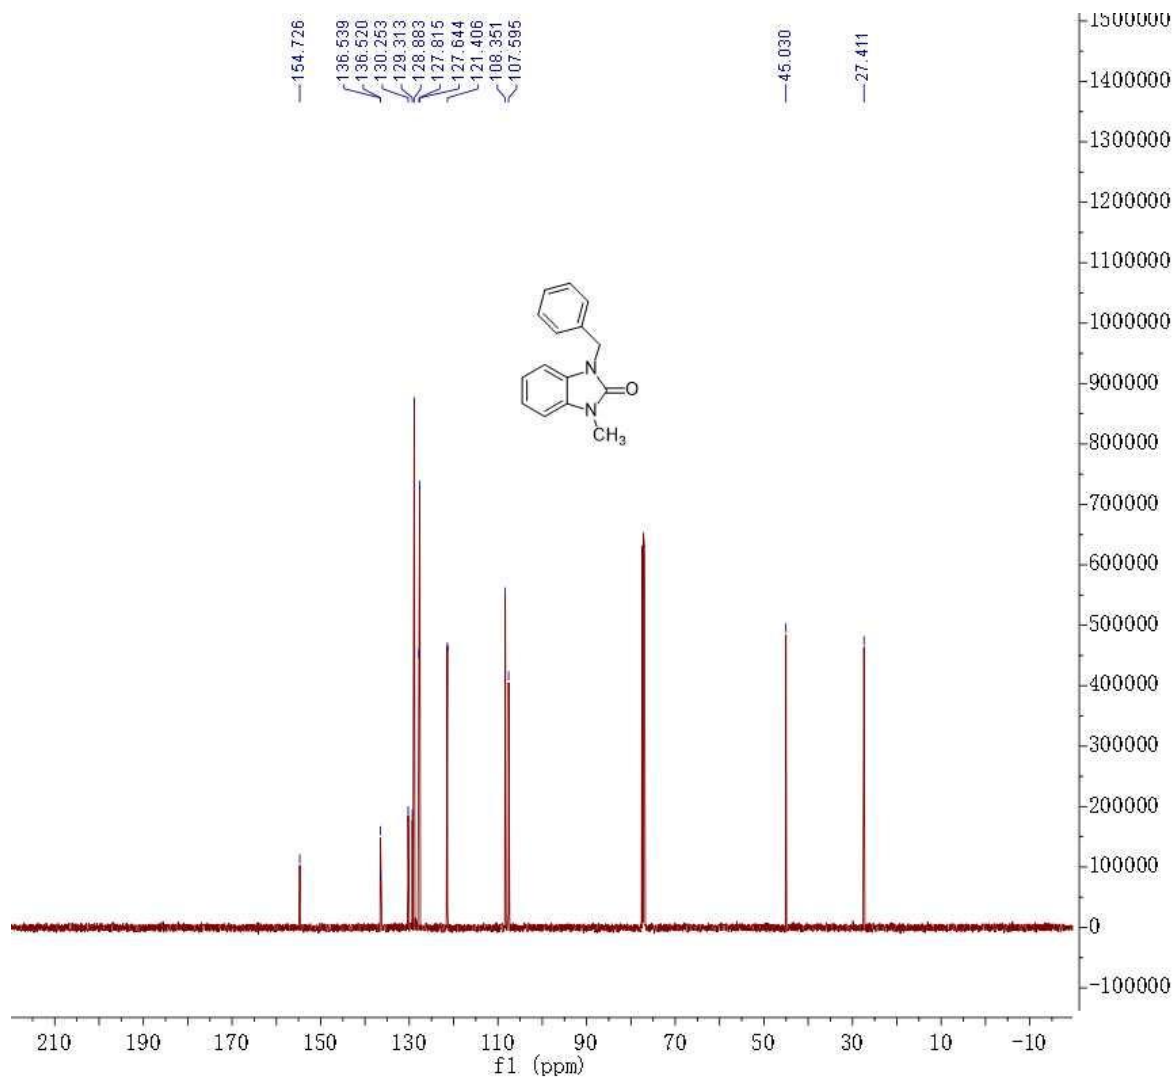

| Parameter           | Value             |
|---------------------|-------------------|
| 1 Instrument        | Avance NEO        |
| 2 Solvent           | CDCl <sub>3</sub> |
| 3 Temperature       | 294.2             |
| 4 Pulse Sequence    | zgpg30            |
| 5 Number of Scans   | 200               |
| 6 Receiver Gain     | 101.0             |
| 7 Relaxation Delay  | 2.0000            |
| 8 Pulse Width       | 10.0000           |
| 9 Spectrometer      | 125.78            |
| Frequency           |                   |
| 10 Spectral Width   | 30120.5           |
| 11 Lowest Frequency | -2468.2           |
| 12 Nucleus          | <sup>13</sup> C   |
| 13 Acquired Size    | 32768             |
| 14 Spectral Size    | 65536             |

**1,3-dibenzyl-4-oxo-3,4-dihydroquinazolin-1-ium bromide (8)**

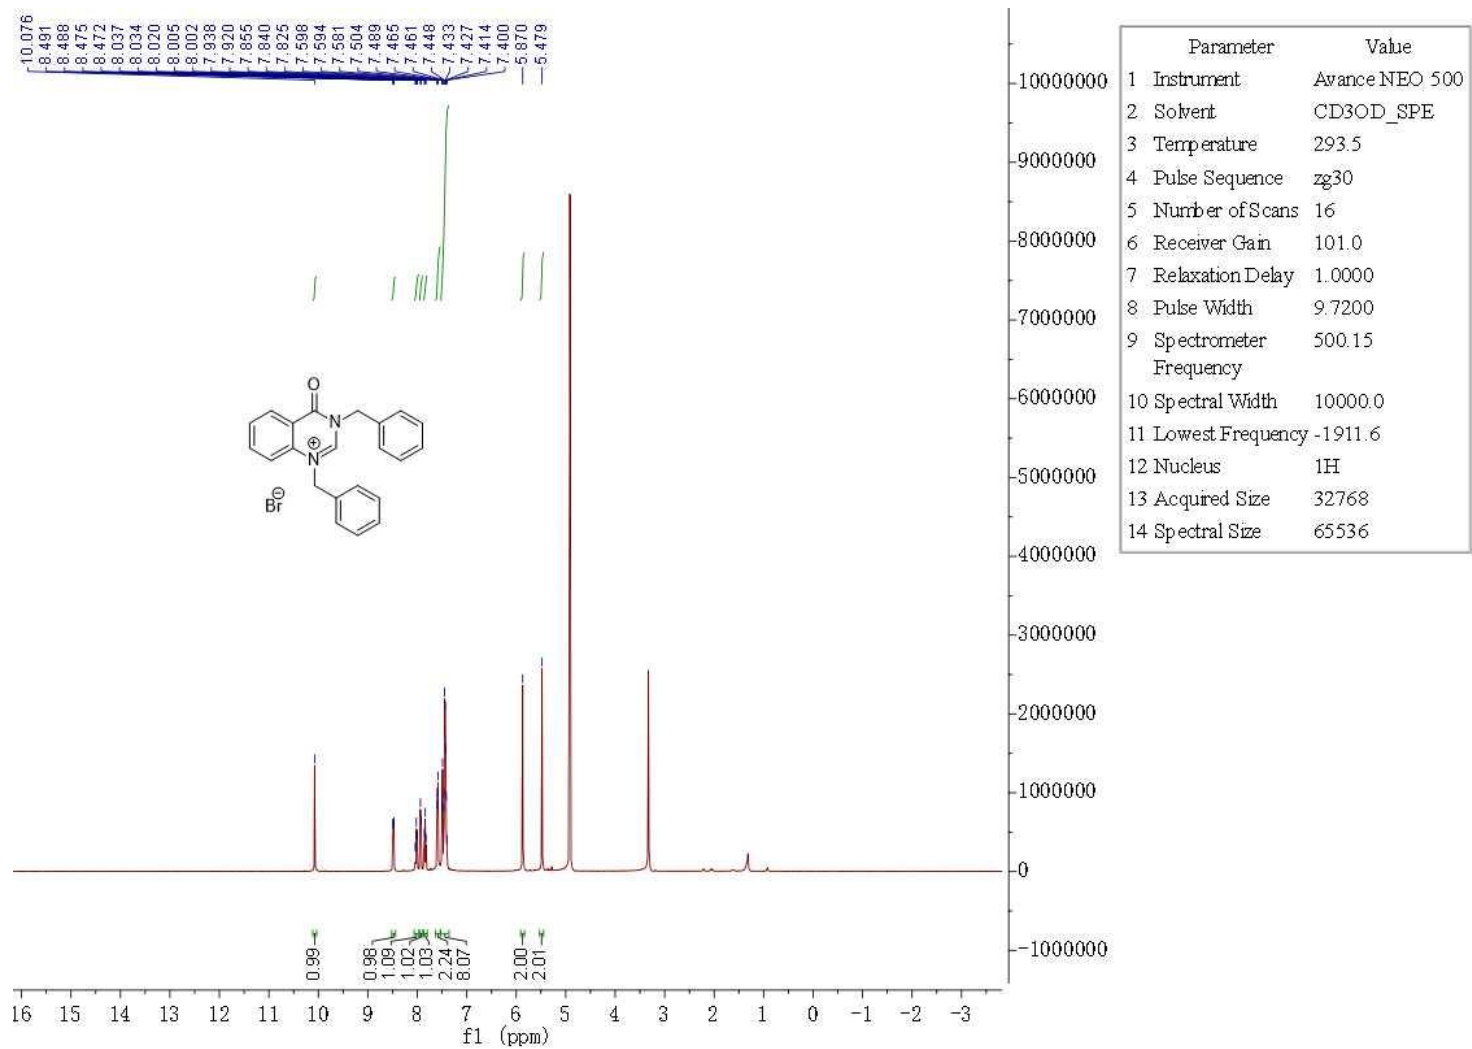

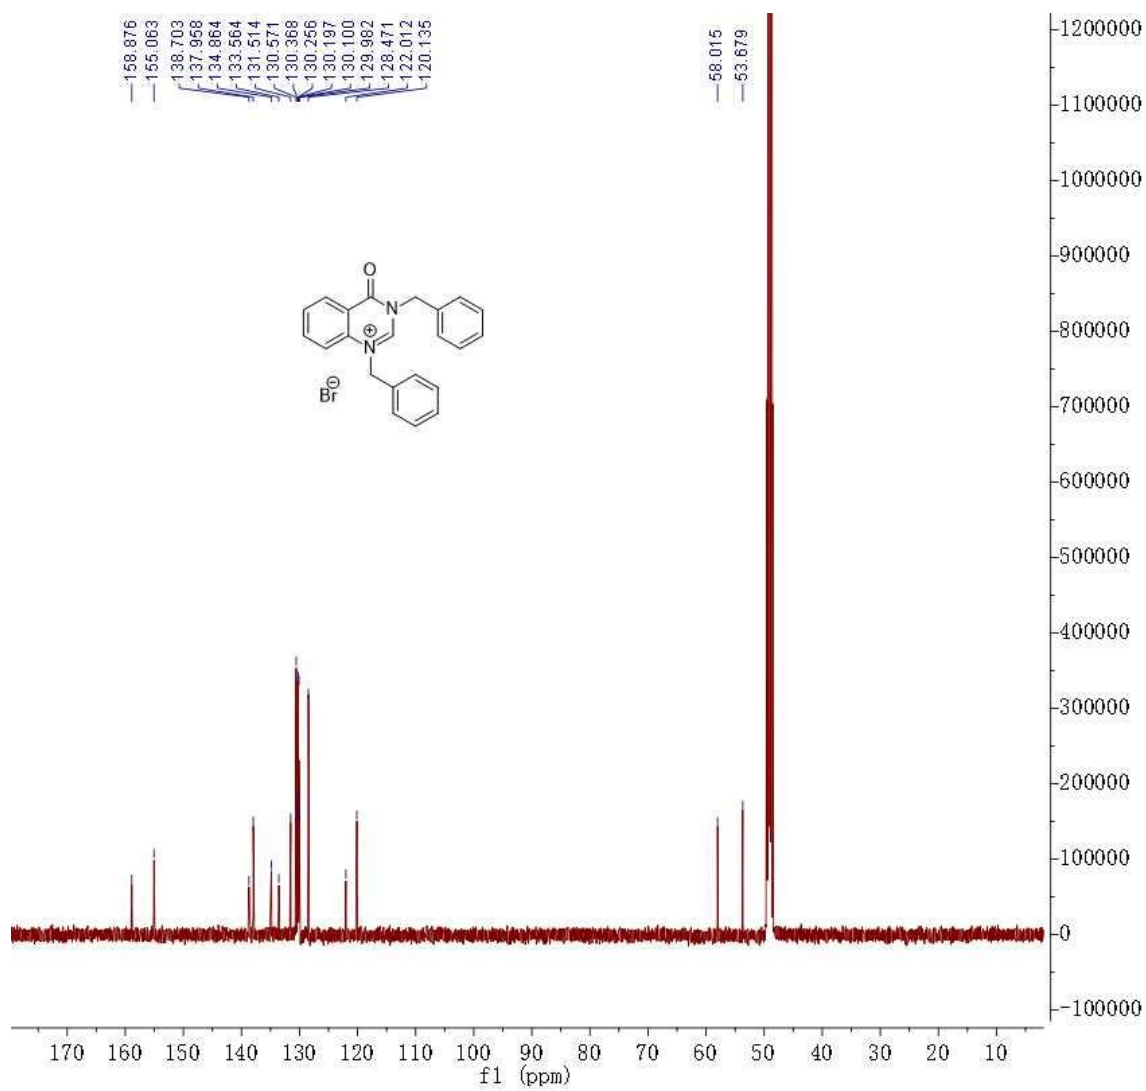

| Parameter                | Value           |
|--------------------------|-----------------|
| 1 Instrument             | Avance NEO 500  |
| 2 Solvent                | CD3OD_SPE       |
| 3 Temperature            | 295.5           |
| 4 Pulse Sequence         | zgpg30          |
| 5 Number of Scans        | 500             |
| 6 Receiver Gain          | 101.0           |
| 7 Relaxation Delay       | 2.0000          |
| 8 Pulse Width            | 10.0000         |
| 9 Spectrometer Frequency | 125.78          |
| 10 Spectral Width        | 30120.5         |
| 11 Lowest Frequency      | -2308.8         |
| 12 Nucleus               | $^{13}\text{C}$ |
| 13 Acquired Size         | 32768           |
| 14 Spectral Size         | 65536           |

**3-benzyl-2-(benzyloxy)quinazolin-4(3H)-one (9)**

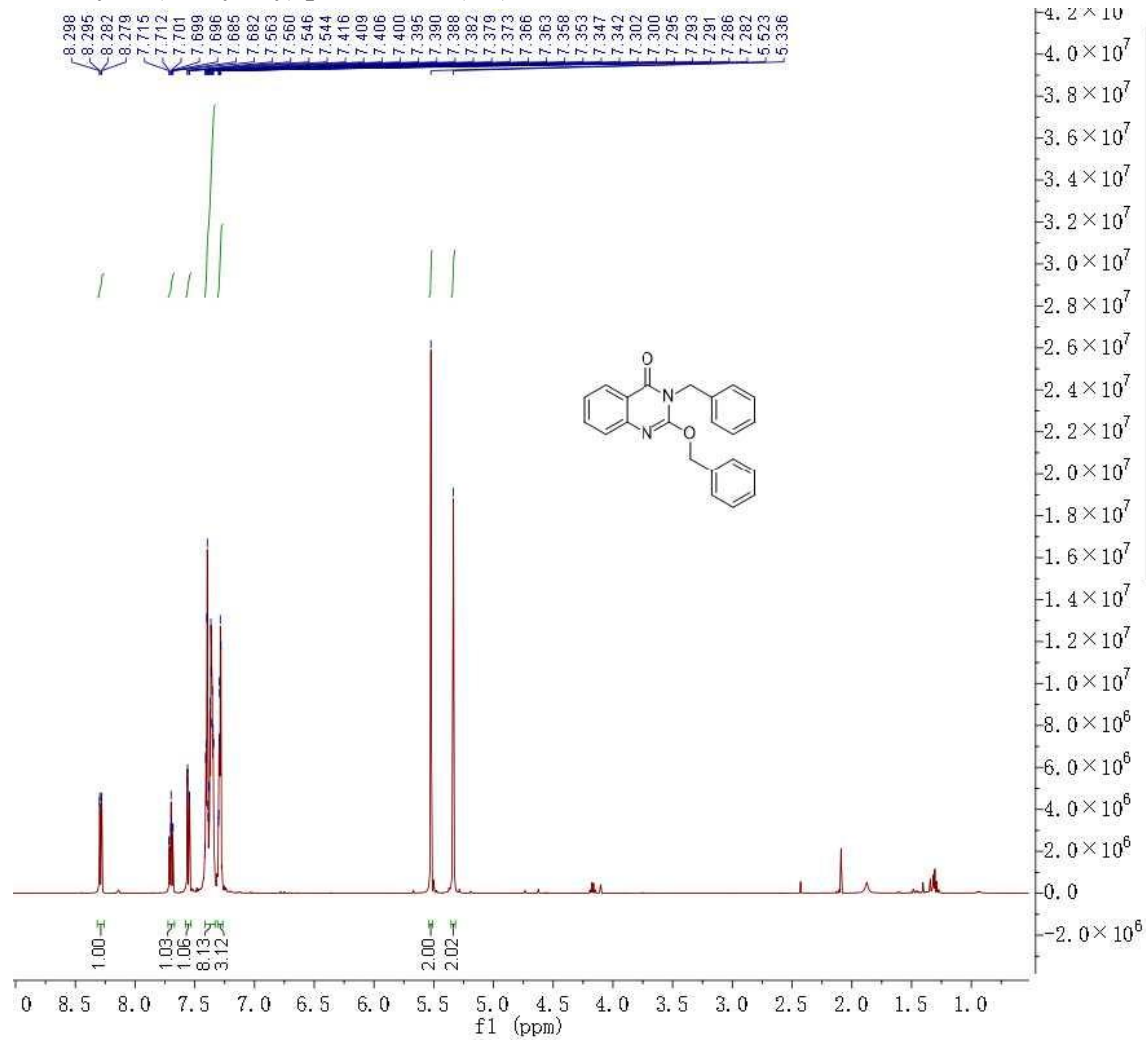

| Parameter                | Value      |
|--------------------------|------------|
| 1 Instrument             | Avance NEO |
| 2 Solvent                | CDCl3      |
| 3 Temperature            | 296.2      |
| 4 Pulse Sequence         | zg30       |
| 5 Number of Scans        | 16         |
| 6 Receiver Gain          | 67.1       |
| 7 Relaxation Delay       | 1.0000     |
| 8 Pulse Width            | 9.7200     |
| 9 Spectrometer Frequency | 500.15     |
| 10 Spectral Width        | 10000.0    |
| 11 Lowest Frequency      | -1911.6    |
| 12 Nucleus               | 1H         |
| 13 Acquired Size         | 32768      |
| 14 Spectral Size         | 65536      |

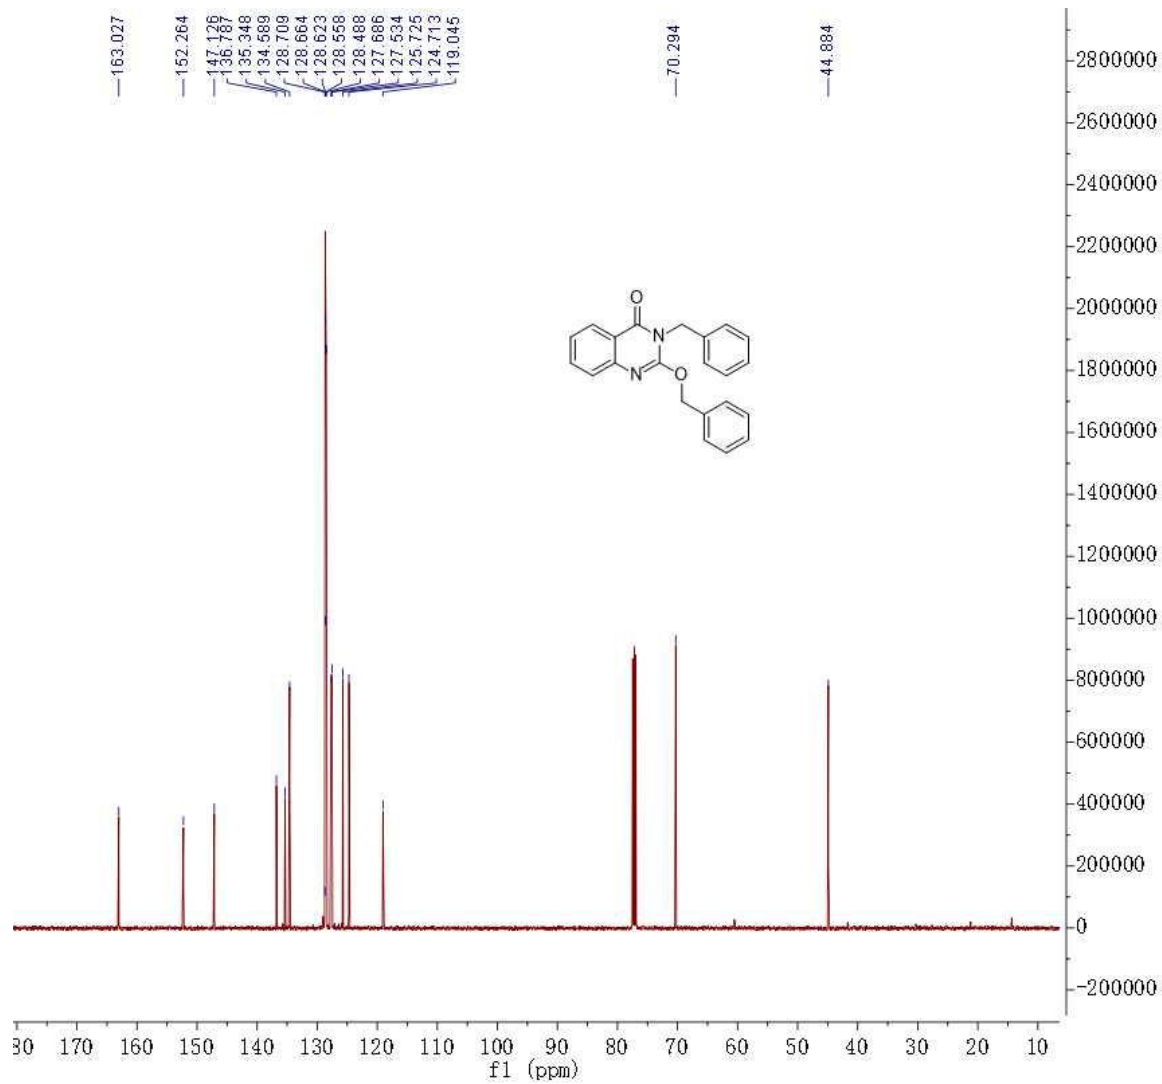

| Parameter           | Value      |
|---------------------|------------|
| 1 Instrument        | Avance NEO |
| 2 Solvent           | CDCl3      |
| 3 Temperature       | 296.2      |
| 4 Pulse Sequence    | zgpg30     |
| 5 Number of Scans   | 200        |
| 6 Receiver Gain     | 101.0      |
| 7 Relaxation Delay  | 2.0000     |
| 8 Pulse Width       | 10.0000    |
| 9 Spectrometer      | 125.78     |
| Frequency           |            |
| 10 Spectral Width   | 30120.5    |
| 11 Lowest Frequency | -2475.5    |
| 12 Nucleus          | 13C        |
| 13 Acquired Size    | 32768      |
| 14 Spectral Size    | 65536      |
